# Supplementary material for: High expression of RIPK2 is associated with Taxol resistance in serous ovarian cancer
Source: J Ovarian Res. 2022 Apr 27;15:48. doi: 10.1186/s13048-022-00986-2 (PMC9044796; doi:10.1186/s13048-022-00986-2)
Supplement: Supplementary file 6 — Additional file 6: Supplementary Table 6. Relationship_of_CNA_with_RIPK2. [file 13048_2022_986_MOESM6_ESM.csv]

	Gene	Cytoband	Alteration	Altered.group	Unaltered.group	Log.Ratio	p.Value	q.Value	Enriched.in
1	OSGIN2	8q21.3	Amp	5 (19.23%)	0 (0.00%)	>10	8.08E-06	0.209	Altered group
2	NBN	8q21.3	Amp	5 (19.23%)	1 (0.44%)	5.44	4.51E-05	0.584	Altered group
3	RAB2A	8q12.1-q12.2	Amp	6 (23.08%)	4 (1.77%)	3.7	0.000108	0.897	Altered group
4	CALB1	8q21.3	Amp	5 (19.23%)	3 (1.33%)	3.86	0.000363	0.897	Altered group
5	DECR1	8q21.3	Amp	5 (19.23%)	3 (1.33%)	3.86	0.000363	0.897	Altered group
6	LINC00588	8q12.1	Amp	4 (15.38%)	1 (0.44%)	5.12	0.0004233	0.897	Altered group
7	TMEM64	8q21.3	Amp	4 (15.38%)	1 (0.44%)	5.12	0.0004233	0.897	Altered group
8	BHLHE22	8q12.3	Amp	3 (11.54%)	0 (0.00%)	>10	0.0009865	0.897	Altered group
9	CNGB3	8q21.3	Amp	3 (11.54%)	0 (0.00%)	>10	0.0009865	0.897	Altered group
10	CYP7B1	8q12.3	Amp	3 (11.54%)	0 (0.00%)	>10	0.0009865	0.897	Altered group
11	LOC401463	8q12.3	Amp	3 (11.54%)	0 (0.00%)	>10	0.0009865	0.897	Altered group
12	PNPLA7	9q34.3	Amp	3 (11.54%)	0 (0.00%)	>10	0.0009865	0.897	Altered group
13	FAM110B	8q12.1	Amp	4 (15.38%)	2 (0.88%)	4.12	0.00118	0.897	Altered group
14	IMPAD1	8q12.1	Amp	4 (15.38%)	2 (0.88%)	4.12	0.00118	0.897	Altered group
15	LRRC69	8q21.3	Amp	4 (15.38%)	2 (0.88%)	4.12	0.00118	0.897	Altered group
16	NECAB1	8q21.3	Amp	4 (15.38%)	2 (0.88%)	4.12	0.00118	0.897	Altered group
17	OTUD6B	8q21.3	Amp	4 (15.38%)	2 (0.88%)	4.12	0.00118	0.897	Altered group
18	PIP4P2	8q21.3	Amp	4 (15.38%)	2 (0.88%)	4.12	0.00118	0.897	Altered group
19	CA8	8q12.1	Amp	5 (19.23%)	5 (2.21%)	3.12	0.001409	0.897	Altered group
20	CHD7	8q12.2	Amp	5 (19.23%)	5 (2.21%)	3.12	0.001409	0.897	Altered group
21	MRPS28	8q21.13	Amp	4 (15.38%)	3 (1.33%)	3.53	0.002557	0.897	Altered group
22	SLC26A7	8q21.3	Amp	4 (15.38%)	3 (1.33%)	3.53	0.002557	0.897	Altered group
23	SMARCA2	9p24.3	Amp	4 (15.38%)	3 (1.33%)	3.53	0.002557	0.897	Altered group
24	ABCA2	9q34.3	Amp	3 (11.54%)	1 (0.44%)	4.7	0.003673	0.897	Altered group
25	AGPAT2	9q34.3	Amp	3 (11.54%)	1 (0.44%)	4.7	0.003673	0.897	Altered group
26	AJM1	9q34.3	Amp	3 (11.54%)	1 (0.44%)	4.7	0.003673	0.897	Altered group
27	ANAPC2	9q34.3	Amp	3 (11.54%)	1 (0.44%)	4.7	0.003673	0.897	Altered group
28	C8G	9q34.3	Amp	3 (11.54%)	1 (0.44%)	4.7	0.003673	0.897	Altered group
29	C9ORF139	9q34.3	Amp	3 (11.54%)	1 (0.44%)	4.7	0.003673	0.897	Altered group
30	C9ORF163	9q34.3	Amp	3 (11.54%)	1 (0.44%)	4.7	0.003673	0.897	Altered group
31	CAMSAP1	9q34.3	Amp	3 (11.54%)	1 (0.44%)	4.7	0.003673	0.897	Altered group
32	CARD9	9q34.3	Amp	3 (11.54%)	1 (0.44%)	4.7	0.003673	0.897	Altered group
33	CCDC183	9q34.3	Amp	3 (11.54%)	1 (0.44%)	4.7	0.003673	0.897	Altered group
34	CCDC183-AS1	9q34.3	Amp	3 (11.54%)	1 (0.44%)	4.7	0.003673	0.897	Altered group
35	CCDC6	10q21.2	Amp	3 (11.54%)	1 (0.44%)	4.7	0.003673	0.897	Altered group
36	CLIC3	9q34.3	Amp	3 (11.54%)	1 (0.44%)	4.7	0.003673	0.897	Altered group
37	CNBD1	8q21.3	Amp	3 (11.54%)	1 (0.44%)	4.7	0.003673	0.897	Altered group
38	CYSRT1	9q34.3	Amp	3 (11.54%)	1 (0.44%)	4.7	0.003673	0.897	Altered group
39	DIPK1B	9q34.3	Amp	3 (11.54%)	1 (0.44%)	4.7	0.003673	0.897	Altered group
40	DKFZP434A062	9q34.3	Amp	3 (11.54%)	1 (0.44%)	4.7	0.003673	0.897	Altered group
41	DNLZ	9q34.3	Amp	3 (11.54%)	1 (0.44%)	4.7	0.003673	0.897	Altered group
42	DPP7	9q34.3	Amp	3 (11.54%)	1 (0.44%)	4.7	0.003673	0.897	Altered group
43	EDF1	9q34.3	Amp	3 (11.54%)	1 (0.44%)	4.7	0.003673	0.897	Altered group
44	EGFL7	9q34.3	Amp	3 (11.54%)	1 (0.44%)	4.7	0.003673	0.897	Altered group
45	ENTPD2	9q34.3	Amp	3 (11.54%)	1 (0.44%)	4.7	0.003673	0.897	Altered group
46	ENTPD8	9q34.3	Amp	3 (11.54%)	1 (0.44%)	4.7	0.003673	0.897	Altered group
47	ENTR1	9q34.3	Amp	3 (11.54%)	1 (0.44%)	4.7	0.003673	0.897	Altered group
48	EXD3	9q34.3	Amp	3 (11.54%)	1 (0.44%)	4.7	0.003673	0.897	Altered group
49	FAM166A	9q34.3	Amp	3 (11.54%)	1 (0.44%)	4.7	0.003673	0.897	Altered group
50	FBXW5	9q34.3	Amp	3 (11.54%)	1 (0.44%)	4.7	0.003673	0.897	Altered group
51	FUT7	9q34.3	Amp	3 (11.54%)	1 (0.44%)	4.7	0.003673	0.897	Altered group
52	GPSM1	9q34.3	Amp	3 (11.54%)	1 (0.44%)	4.7	0.003673	0.897	Altered group
53	GRIN1	9q34.3	Amp	3 (11.54%)	1 (0.44%)	4.7	0.003673	0.897	Altered group
54	INPP5E	9q34.3	Amp	3 (11.54%)	1 (0.44%)	4.7	0.003673	0.897	Altered group
55	KCNT1	9q34.3	Amp	3 (11.54%)	1 (0.44%)	4.7	0.003673	0.897	Altered group
56	LCN10	9q34.3	Amp	3 (11.54%)	1 (0.44%)	4.7	0.003673	0.897	Altered group
57	LCN12	9q34.3	Amp	3 (11.54%)	1 (0.44%)	4.7	0.003673	0.897	Altered group
58	LCN15	9q34.3	Amp	3 (11.54%)	1 (0.44%)	4.7	0.003673	0.897	Altered group
59	LCN6	9q34.3	Amp	3 (11.54%)	1 (0.44%)	4.7	0.003673	0.897	Altered group
60	LCN8	9q34.3	Amp	3 (11.54%)	1 (0.44%)	4.7	0.003673	0.897	Altered group
61	LCN9	9q34.3	Amp	3 (11.54%)	1 (0.44%)	4.7	0.003673	0.897	Altered group
62	LCNL1	9q34.3	Amp	3 (11.54%)	1 (0.44%)	4.7	0.003673	0.897	Altered group
63	LHX3	9q34.3	Amp	3 (11.54%)	1 (0.44%)	4.7	0.003673	0.897	Altered group
64	LRRC26	9q34.3	Amp	3 (11.54%)	1 (0.44%)	4.7	0.003673	0.897	Altered group
65	MAMDC4	9q34.3	Amp	3 (11.54%)	1 (0.44%)	4.7	0.003673	0.897	Altered group
66	MAN1B1	9q34.3	Amp	3 (11.54%)	1 (0.44%)	4.7	0.003673	0.897	Altered group
67	MAN1B1-DT	9q34.3	Amp	3 (11.54%)	1 (0.44%)	4.7	0.003673	0.897	Altered group
68	MMP16	8q21.3	Amp	3 (11.54%)	1 (0.44%)	4.7	0.003673	0.897	Altered group
69	NACC2	9q34.3	Amp	3 (11.54%)	1 (0.44%)	4.7	0.003673	0.897	Altered group
70	NDOR1	9q34.3	Amp	3 (11.54%)	1 (0.44%)	4.7	0.003673	0.897	Altered group
71	NELFB	9q34.3	Amp	3 (11.54%)	1 (0.44%)	4.7	0.003673	0.897	Altered group
72	NOTCH1	9q34.3	Amp	3 (11.54%)	1 (0.44%)	4.7	0.003673	0.897	Altered group
73	NOXA1	9q34.3	Amp	3 (11.54%)	1 (0.44%)	4.7	0.003673	0.897	Altered group
74	NPDC1	9q34.3	Amp	3 (11.54%)	1 (0.44%)	4.7	0.003673	0.897	Altered group
75	NRARP	9q34.3	Amp	3 (11.54%)	1 (0.44%)	4.7	0.003673	0.897	Altered group
76	NSMF	9q34.3	Amp	3 (11.54%)	1 (0.44%)	4.7	0.003673	0.897	Altered group
77	PAXX	9q34.3	Amp	3 (11.54%)	1 (0.44%)	4.7	0.003673	0.897	Altered group
78	PHPT1	9q34.3	Amp	3 (11.54%)	1 (0.44%)	4.7	0.003673	0.897	Altered group
79	PMPCA	9q34.3	Amp	3 (11.54%)	1 (0.44%)	4.7	0.003673	0.897	Altered group
80	PTGDS	9q34.3	Amp	3 (11.54%)	1 (0.44%)	4.7	0.003673	0.897	Altered group
81	QSOX2	9q34.3	Amp	3 (11.54%)	1 (0.44%)	4.7	0.003673	0.897	Altered group
82	RABL6	9q34.3	Amp	3 (11.54%)	1 (0.44%)	4.7	0.003673	0.897	Altered group
83	RNF208	9q34.3	Amp	3 (11.54%)	1 (0.44%)	4.7	0.003673	0.897	Altered group
84	SAPCD2	9q34.3	Amp	3 (11.54%)	1 (0.44%)	4.7	0.003673	0.897	Altered group
85	SEC16A	9q34.3	Amp	3 (11.54%)	1 (0.44%)	4.7	0.003673	0.897	Altered group
86	SLC34A3	9q34.3	Amp	3 (11.54%)	1 (0.44%)	4.7	0.003673	0.897	Altered group
87	SNAPC4	9q34.3	Amp	3 (11.54%)	1 (0.44%)	4.7	0.003673	0.897	Altered group
88	SNHG7	9q34.3	Amp	3 (11.54%)	1 (0.44%)	4.7	0.003673	0.897	Altered group
89	SNORA17A	9q34.3	Amp	3 (11.54%)	1 (0.44%)	4.7	0.003673	0.897	Altered group
90	SNORA17B	9q34.3	Amp	3 (11.54%)	1 (0.44%)	4.7	0.003673	0.897	Altered group
91	SOHLH1	9q34.3	Amp	3 (11.54%)	1 (0.44%)	4.7	0.003673	0.897	Altered group
92	SSNA1	9q34.3	Amp	3 (11.54%)	1 (0.44%)	4.7	0.003673	0.897	Altered group
93	STPG3	9q34.3	Amp	3 (11.54%)	1 (0.44%)	4.7	0.003673	0.897	Altered group
94	TMEM141	9q34.3	Amp	3 (11.54%)	1 (0.44%)	4.7	0.003673	0.897	Altered group
95	TMEM203	9q34.3	Amp	3 (11.54%)	1 (0.44%)	4.7	0.003673	0.897	Altered group
96	TMEM250	9q34.3	Amp	3 (11.54%)	1 (0.44%)	4.7	0.003673	0.897	Altered group
97	TOR4A	9q34.3	Amp	3 (11.54%)	1 (0.44%)	4.7	0.003673	0.897	Altered group
98	TPRN	9q34.3	Amp	3 (11.54%)	1 (0.44%)	4.7	0.003673	0.897	Altered group
99	TRAF2	9q34.3	Amp	3 (11.54%)	1 (0.44%)	4.7	0.003673	0.897	Altered group
100	TUBB4B	9q34.3	Amp	3 (11.54%)	1 (0.44%)	4.7	0.003673	0.897	Altered group
101	UAP1L1	9q34.3	Amp	3 (11.54%)	1 (0.44%)	4.7	0.003673	0.897	Altered group
102	UBAC1	9q34.3	Amp	3 (11.54%)	1 (0.44%)	4.7	0.003673	0.897	Altered group
103	USP53	4q26	Amp	3 (11.54%)	1 (0.44%)	4.7	0.003673	0.897	Altered group
104	ATP6V1H	8q11.23	Amp	5 (19.23%)	7 (3.10%)	2.63	0.003821	0.897	Altered group
105	C8ORF34	8q13.2	Amp	5 (19.23%)	8 (3.54%)	2.44	0.005765	0.897	Altered group
106	SOX17	8q11.23	Amp	5 (19.23%)	8 (3.54%)	2.44	0.005765	0.897	Altered group
107	ALKAL1	8q11.23	Amp	4 (15.38%)	5 (2.21%)	2.8	0.007946	0.897	Altered group
108	ASPH	8q12.3	Amp	4 (15.38%)	5 (2.21%)	2.8	0.007946	0.897	Altered group
109	C6	5p13.1	Amp	4 (15.38%)	5 (2.21%)	2.8	0.007946	0.897	Altered group
110	MOS	8q12.1	Amp	4 (15.38%)	5 (2.21%)	2.8	0.007946	0.897	Altered group
111	OPRK1	8q11.23	Amp	4 (15.38%)	5 (2.21%)	2.8	0.007946	0.897	Altered group
112	PENK	8q12.1	Amp	4 (15.38%)	5 (2.21%)	2.8	0.007946	0.897	Altered group
113	RB1CC1	8q11.23	Amp	4 (15.38%)	5 (2.21%)	2.8	0.007946	0.897	Altered group
114	RPS20	8q12.1	Amp	4 (15.38%)	5 (2.21%)	2.8	0.007946	0.897	Altered group
115	SDR16C5	8q12.1	Amp	4 (15.38%)	5 (2.21%)	2.8	0.007946	0.897	Altered group
116	SDR16C6P	8q12.1	Amp	4 (15.38%)	5 (2.21%)	2.8	0.007946	0.897	Altered group
117	SNORD54	8q12.1	Amp	4 (15.38%)	5 (2.21%)	2.8	0.007946	0.897	Altered group
118	ST18	8q11.23	Amp	4 (15.38%)	5 (2.21%)	2.8	0.007946	0.897	Altered group
119	LOC728613	5p15.33	Amp	5 (19.23%)	9 (3.98%)	2.27	0.008327	0.897	Altered group
120	LPCAT1	5p15.33	Amp	5 (19.23%)	9 (3.98%)	2.27	0.008327	0.897	Altered group
121	SDHAP3	5p15.33	Amp	5 (19.23%)	9 (3.98%)	2.27	0.008327	0.897	Altered group
122	ANK3	10q21.2	Amp	3 (11.54%)	2 (0.88%)	3.7	0.008547	0.897	Altered group
123	DCAF4L2	8q21.3	Amp	3 (11.54%)	2 (0.88%)	3.7	0.008547	0.897	Altered group
124	GGH	8q12.3	Amp	3 (11.54%)	2 (0.88%)	3.7	0.008547	0.897	Altered group
125	KIRREL3	11q24.2	Amp	3 (11.54%)	2 (0.88%)	3.7	0.008547	0.897	Altered group
126	LINC00908	18q23	DeepDel	3 (11.54%)	2 (0.88%)	3.7	0.008547	0.897	Altered group
127	LINC01553	10q21.2	Amp	3 (11.54%)	2 (0.88%)	3.7	0.008547	0.897	Altered group
128	MYOZ2	4q26	Amp	3 (11.54%)	2 (0.88%)	3.7	0.008547	0.897	Altered group
129	NKAIN3-IT1	8q12.3	Amp	3 (11.54%)	2 (0.88%)	3.7	0.008547	0.897	Altered group
130	TTPA	8q12.3	Amp	3 (11.54%)	2 (0.88%)	3.7	0.008547	0.897	Altered group
131	ZBTB10	8q21.13	Amp	3 (11.54%)	2 (0.88%)	3.7	0.008547	0.897	Altered group
