# Supplementary material for: High expression of RIPK2 is associated with Taxol resistance in serous ovarian cancer
Source: J Ovarian Res. 2022 Apr 27;15:48. doi: 10.1186/s13048-022-00986-2 (PMC9044796; doi:10.1186/s13048-022-00986-2)
Supplement: Supplementary file 8 — Additional file 8: Supplementary Table 8. Immune_infiltration. [file 13048_2022_986_MOESM8_ESM.xlsx]

## Sheet: immune_infiltration_TCGA
	aDC	Adipocytes	Astrocytes	B-cells	Basophils	CD4+ memory T-cells	CD4+ naive T-cells	CD4+ T-cells	CD4+ Tcm	CD4+ Tem	CD8+ naive T-cells	CD8+ T-cells	CD8+ Tcm	CD8+ Tem	cDC	Chondrocytes	Class-switched memory B-cells	CLP	CMP	DC	Endothelial cells	Eosinophils	Epithelial cells	Erythrocytes	Fibroblasts	GMP	Hepatocytes	HSC	iDC	Keratinocytes	ly Endothelial cells	Macrophages	Macrophages M1	Macrophages M2	Mast cells	Megakaryocytes	Melanocytes	Memory B-cells	MEP	Mesangial cells	Monocytes	MPP	MSC	mv Endothelial cells	Myocytes	naive B-cells	Neurons	Neutrophils	NK cells
TCGA-23-1028	0.0690197	0	0.0184606	0.033449	7.98677e-20	0.0166749	0	0	0	0	0.0200739	0.0134214	0.0264274	3.4284e-19	0.013734	0.0100902	1.79974e-19	0.0815873	0	0.00255299	1.34456e-19	8.03963e-20	0.388531	0	0.0200963	1.76505e-18	6.49088e-19	0.0562935	0.0034454	0.0450943	0	0.0210074	0.0124657	0.00314902	0.00657973	0.000747003	7.64848e-20	0	0.0281534	0	1.09655e-18	1.66941e-18	0	0	0.000530656	0.00159802	0.00127987	5.42749e-20	0
TCGA-24-1923	0.0905085	1.61736e-19	0.187679	0.0193904	6.21119e-18	0	2.32273e-18	0	0.0180593	1.58893e-18	0.0040893	0.00826412	0	0	0.0136797	0.0849569	4.63368e-18	0.0393152	0.00239861	0.000445639	0.00018943	0	0.263208	3.10045e-20	0.212843	1.04862e-17	0	0.227991	0.0188242	0.0178216	0	0.00655321	0.00824352	0.00520236	0.00356074	0.000668614	0.000467785	0	0.022132	0.0135867	9.04792e-18	0	0	0	0.00435502	3.01266e-20	0.0040244	1.91867e-18	0
TCGA-24-1604	0.105023	0	0.0240273	0.018785	0.0433273	1.90058e-20	0	0	0.0286019	0.0016356	1.34663e-19	0.0327891	0.0246118	1.008e-18	0.00921686	0.0296487	0.00557401	0.00533263	3.21644e-18	0.000665456	0.0059269	0	0.26712	0	0.0416275	0	0.00126818	0.0272562	0	0.0300897	0.00317491	0.0181193	0.0227543	0.00919611	0.0173086	1.8974e-05	0.0057023	0	0.0287793	0.0164583	0	0	0	0.00186105	0.0138673	1.66914e-18	0.000158746	0	2.81438e-18
TCGA-29-1766	0.145419	0.0185341	0.203419	2.63229e-19	7.27053e-20	0.0192436	0	4.05362e-18	0	0	0.015067	0.00187997	0.0163099	0	0.0213706	0.0692477	0	0.123148	4.24776e-18	3.37894e-19	4.44907e-18	4.1466e-19	0.295898	6.03834e-19	0.0596245	1.55478e-19	0	0.127619	0.0020038	0.0303634	0	0.036168	0.0148123	0.0129782	0	0.00129858	0.00503868	0	0.0191754	0	6.06689e-19	0	0.213626	1.696e-18	0.0173367	0	0.00242655	2.47827e-19	0
TCGA-29-1710	0.312469	0.00309162	0.12095	0.0540103	0.0781256	1.30365e-05	0.00502962	3.24532e-19	0.00343077	0.0843873	0	0.0506002	0.047906	7.83208e-28	0.372556	0.0166005	0.0328666	0.00646941	3.61798e-19	0.0546258	2.00103e-19	0	0.399902	0	0.0443666	0	3.99133e-19	0.0420884	0.0140533	0.0359765	0	0.0924078	0.0537742	0.0344354	0.0133411	6.95883e-19	0.00221046	1.07949e-19	0	0.0164758	0.0252335	5.89774e-18	0.134546	0	5.34815e-19	0	0	0	0.000924535
TCGA-30-1853	1.75096e-18	0	0.137923	0	0.0122348	9.60689e-20	2.87079e-18	0	0.0622259	1.61814e-19	0.0314117	0.00183591	0	2.02031e-18	0.0115693	0.00840799	3.16822e-19	0.0451578	0	0	0.0142245	0.00209695	0.221892	0	1.95718e-18	0	0	0.0916121	0.0451236	0.0357098	0.0047234	0	3.69043e-20	0.00951715	0.00263193	0.000182048	7.95334e-05	4.01755e-18	0.0416674	5.81289e-19	1.1674e-18	5.41432e-19	0.0514254	0.00497514	0.0323356	0	0.00967829	2.61838e-18	0
TCGA-24-1567	0.00849496	7.68552e-20	0.0262816	0.00353363	0.0172057	1.09874e-20	2.90811e-18	7.2501e-19	0.00273465	0	0.000844804	0.0400392	0.0660698	0	0.00189137	2.05988e-18	0.000734352	0.0132397	8.17189e-19	2.61149e-19	0	1.05488e-19	0.27528	6.1485e-19	4.25262e-19	2.67355e-18	0.000877656	0.00406081	0.00187539	0.0282079	0.00185463	0.0109518	0.0141508	0	0.00699668	0	0.0100742	6.97161e-19	0.035852	0.0391991	3.59665e-20	2.42469e-18	0.153676	3.83554e-19	0.0140502	0.00209444	0.00431363	5.79989e-19	1.95892e-18
TCGA-20-1687	0.17237	0.00330465	0.114578	0.0192791	0.0223855	0	0.00666977	6.2572e-18	5.78717e-19	0.0113289	2.762e-19	1.88818e-22	0.0196021	0	0.0269536	0.0688604	0.0154646	0.0441671	2.56803e-18	0.00418838	0.00314383	1.1305e-18	0.436957	0	0.0356002	0	0.00119618	0.0875205	0	0.0472246	0.00184799	0.0461106	0.036179	0.00810535	0.00338399	0	0.00488149	0	0.0173143	0	0	3.89093e-18	0.0615294	0.00119336	1.69225e-20	7.16966e-19	0.000705476	0	0
TCGA-13-0714	0.150763	0.00688619	0.241928	0.0273209	0.00141605	2.31838e-19	3.96547e-21	5.58854e-18	0.0291381	0.0171003	0	0	0	0	0.0430976	0.0380691	0.00928688	0.0153875	0	0.0072167	0.0161696	0.00246991	0.451444	0	0.0676108	0	0.000987358	0.102698	0.0291315	0.0457281	0.0126771	0.0277514	0.0452807	0.00313812	0.000932786	2.72212e-05	0.00136281	0.00600654	0.031114	0	0	9.51659e-19	0.213302	0.0233421	0	0.000729032	0.00022323	0	1.79204e-18
TCGA-24-2298	0.099005	0.00281031	0.27005	0	4.26173e-18	0	0	5.66329e-19	0.0224605	0.0276485	0.000688863	0.00104156	0.00152932	1.73231e-18	0.00812396	0.0823823	6.14222e-19	0.0508109	0	1.01938e-19	1.93312e-19	0	0.452243	0	0	1.15986e-18	1.89549e-19	0.0615957	2.69883e-19	0.058426	1.03052e-18	0.0148631	0.0170209	0	0.000901952	0.00135042	0.0240795	1.58446e-18	0.00507437	0.0171237	0	0	0.143441	0	7.33398e-19	0	0.00209489	1.23502e-18	0
TCGA-57-1993	0.129152	2.11922e-19	0.0819944	0.0160539	0.0812353	0	0	9.47805e-18	0.0198681	1.22768e-18	1.63649e-18	0	4.28946e-19	0	0.01107	0.0436067	0.0355181	0.0220921	5.89511e-19	0.00163766	2.63318e-20	0.00435972	0.320739	4.12494e-19	0.0409173	0	0.00294276	0	0.0661741	0.035727	2.22929e-19	0.0235027	0.0245826	0.0129502	0.0135622	1.2652e-19	0.000267347	0	0.0201938	0.0174802	0	5.17876e-19	0	0	0.00625387	0	8.2639e-05	3.00675e-19	4.05802e-18
TCGA-61-2012	0.246353	0.000638506	0.0745293	0.0494949	0.115369	0.0053641	0	0	8.49364e-19	0.00557409	2.29783e-19	0.00428676	0.0198077	0	0.025047	0.0324689	0.0423126	0.0152611	3.97682e-18	0.0059831	7.10442e-19	0	0.292222	3.03758e-18	0.0419566	0	0.00235321	1.71112e-20	0.0268582	0.0362413	1.43064e-19	0.0939292	0.0524424	0.0400294	0.00290134	0.000172015	0.00761739	1.04719e-19	0.00919659	0.0100192	0.0120215	4.569e-19	2.64582e-18	1.4928e-18	0.00269173	0	0.000465632	0	1.71833e-18
TCGA-29-2428	0.290596	0	0.0781364	0.0517039	0.0615558	3.07592e-22	4.21807e-18	0	0.0236364	0.0441164	0.02132	0.0275741	0.0467579	6.64471e-18	0.0588373	0.0474123	0.0378955	0.0692352	0	0.0361818	0.0126578	0.00186517	0.301936	2.1315e-19	0	2.65769e-19	0.000810428	0	0.244983	0.034342	0.000610647	0.0869382	0.042624	0.0290302	0.00392133	0	0.000569324	0.014942	0.0354632	0.0420485	0.0029574	1.57702e-18	0.00444944	0.0116709	0.00310957	0	0.00335023	0	1.25061e-17
TCGA-24-1563	0.134413	0.00618269	0.253785	0.00601532	0.058249	0.0106471	8.48453e-21	3.30178e-19	0.00139847	5.04192e-19	0	0	0.0203075	0	0.0152123	0.0705809	0.0180234	0.0494439	0	0.00189875	0.0185327	3.96644e-19	0.36766	0	0.0411864	2.69049e-19	0	0.0662603	0.038889	0.054932	0.00528736	0.0342719	0.0211312	0.00936421	0.00247072	0.0011305	0.00201027	3.49884e-18	8.48827e-05	0.000777967	0.00576328	0	0.20431	0.00275151	0.00335025	0	0.000961854	1.9124e-19	6.84393e-18
TCGA-10-0927	0.0357897	0	0.137312	0	0.00889341	1.00625e-19	0	0	7.7369e-19	1.07529e-18	0.00990527	2.10838e-19	0	0	0	0.0364113	7.72519e-18	0.0656496	3.14073e-18	0	0.00501578	0.0071257	0.21527	0	0.202689	0	0.00166264	0.150146	0	0.0135301	0.00254547	0	6.46555e-20	0.00177619	0.00192115	0.0034083	0.00263592	9.11808e-18	0.0484434	0.0582123	2.31837e-18	0	0.175266	0.000784026	0.022608	0	0.00470532	3.21872e-19	0
TCGA-24-1928	0.160345	0.0158191	0.227405	0	5.57851e-19	0	0.000418784	1.71665e-18	0.0141428	0.0267553	0.000126756	0.0378356	0.00740234	0.00717602	0.0161739	0.0384405	0.00516145	0.0167675	0	0.00143183	0.0316992	0	0.223363	0	0.0541058	1.46058e-18	0	0.0796117	0.0440613	0.0150192	0.00445617	0.0444475	0.03181	0.0168528	0.0107751	0.00103273	0.00474963	3.96014e-19	0.0192701	2.55571e-19	0.00781286	0	0.218704	0.0147463	0.00385191	2.07696e-19	0.000242273	0	2.61807e-18
TCGA-23-1114	0.0192597	0	0.189471	8.65479e-21	0.0621204	0	3.71065e-18	1.16237e-18	0.016869	0	0	1.13984e-18	0	0	0	0.116459	0.00417326	0.0100267	3.45404e-20	5.79368e-20	0.0119027	0.00233907	0.224262	5.77676e-19	0.114696	0	0.00288847	0.0684867	0.00509167	0.0163756	0.00830506	0	0.00157172	0.000381966	0.0101235	0.00407903	1.79251e-18	0	0.007099	0.0914078	1.37021e-18	0	0	0.0011925	0.029659	1.43196e-19	0.0067391	0.00074886	0
TCGA-61-2003	0.216496	1.31262e-20	0.18676	0.0303168	0.0065542	1.42153e-19	0.00414509	2.70417e-18	0.0174349	0.0140589	0	0.0164745	2.26715e-19	3.45471e-19	0.14129	0.089644	0.00835525	0.0175086	8.80009e-19	0.0196846	0.0279749	0.00906186	0.322141	6.3233e-19	0.116373	0	0.00117853	0.139334	0.0057669	0.0278286	0.00574003	0.070165	0.0551211	0.0138257	0.0176963	0.000703007	0.00629976	3.43989e-19	1.12344e-19	0.0411439	0.033765	7.21826e-18	0.162527	0.0146312	0	0.000414585	0.000579091	1.46243e-18	4.15138e-18
TCGA-25-1630	0.201747	0	0.08236	0.046945	0.0669933	0.0140359	1.90795e-18	1.26337e-20	1.24488e-19	0.0327949	0	1.68541e-18	0.010802	2.86153e-18	0.0687869	0.0139724	0.00185956	0.0626046	8.49798e-19	0.00750473	0.00959774	8.83188e-18	0.36922	4.51698e-19	0.0264423	0	0.00283523	0.0294596	0.0263791	0.0403533	0.00237314	0.115566	0.0697795	0.0242517	0.0148376	0	0.00188172	0.0137264	0.0213741	0.0115787	0.0706624	1.99035e-18	2.09751e-18	0.00461958	2.22651e-20	0.00204346	6.25717e-06	0.0109801	6.87809e-18
TCGA-04-1331	0.0439082	6.92292e-20	0.27185	3.17332e-19	0.0320083	1.93349e-19	0	0	0.0274788	0	0.00591768	3.37468e-18	3.14729e-18	0	0.017336	0.048531	5.75718e-19	0.0463481	0	1.05654e-19	0.00148666	5.62177e-21	0.275009	0	0.0218929	4.183e-18	0.00209121	0.102746	0.000612409	0.0246328	0.000746322	8.75357e-19	0.000131681	0	0.00586923	0.000362491	2.17486e-18	0	0.0102606	0.045403	0	0	0	0.00253488	0.00297309	5.00742e-19	0.00491792	1.55348e-19	4.60308e-18
TCGA-36-1568	0.181908	0	0.044927	0.00862554	0.0288441	5.28918e-19	2.32167e-19	0	0.0407123	0.0164033	0	0.0200946	0.0166414	1.77104e-19	0.0497102	0.061503	0.0267433	0.0375821	0	0.010056	0.000111883	3.7267e-21	0.39523	0	0.0431657	7.95781e-19	0.000410836	0.0629281	0	0.0695905	1.03605e-18	0.0354025	0.0321999	0.0117031	0.0140998	5.8501e-21	0.0085655	2.25872e-18	0.00610338	0.0117203	0.00680297	3.86967e-19	0.114424	0	0	0	0.00041047	0	0
TCGA-24-1417	0.27642	0.00107827	0.175317	0.0687423	0.0346301	0.0193728	0.00597714	1.61741e-19	0.000884892	0.00512462	0	0.0258889	0.0284025	1.35201e-18	0.0503194	0.026195	0	0.0539502	0	0.00919331	0.0185622	1.63198e-18	0.278918	0	0.0133557	0	0.000165972	0.0559984	0	0.0305168	0.00110911	0.0672484	0.0649984	0.0157502	0.0159717	0.000783034	0.00336399	2.31274e-18	0.0216672	0.00723975	0.0112836	0	0.0764311	0.00509512	3.70871e-19	0.00324041	0.000451637	2.22393e-19	4.25221e-18
TCGA-04-1332	0.121338	2.19088e-20	0.285533	0	2.94494e-19	0	2.26697e-18	0	0.00809159	0	1.64324e-18	0	0	0	0.0380064	0.0991871	0	0.00656851	0.00520829	0.00363709	0.108283	0.0131189	0.267158	0	0.181155	0	0.00393051	0.263942	0.0663832	0.0234644	0.0859441	0.00887682	0.036322	0.00362403	1.58081e-19	0.00349042	0.00742683	4.57703e-18	0.0188681	0.0349176	3.97775e-18	1.85865e-18	0.208739	0.0806689	0.00753558	3.22217e-18	0.00391751	0	0
TCGA-24-1424	0.172845	0	0.225419	0.00661614	0.0216234	0.00304886	0	0	0.00124772	2.49814e-19	0	0.00941416	0	4.88276e-18	0.0319283	0.0248315	0	0.0184611	6.86462e-19	0.00672807	0.031893	0.00736204	0.228702	0	0.0321626	0	0.000606419	0.0210245	0.0415595	0.0165542	0.00885334	0.0186699	0.0278663	0.00427993	0.00450407	0.00352655	0.0037653	0	0.0220404	0.0588441	0.00270754	2.31856e-18	0	0.00972917	0.0096044	0.00146944	0.00239458	0	3.65426e-18
TCGA-29-1690	0.320282	2.41459e-20	0.0566396	0.0402866	0.140812	0.00360964	5.02009e-18	5.3595e-19	0	0.0440659	0	5.84025e-18	0.000253998	1.80291e-18	0.178924	0.0565168	0.00429991	0.0803757	0	0.0719915	0	0	0.446749	2.92762e-19	0.0946322	0	0.00390458	0.0555572	0.601403	0.0489397	0	0.0928299	0.0510423	0.0346106	0.00643175	0	0.00187081	0	0.00839877	0.0176961	0.0939329	4.02376e-18	2.54517e-17	1.21664e-18	0	0.000435857	0.000782243	1.10195e-18	0
TCGA-24-2023	0.160833	8.85182e-20	0	0.00921607	0.0708337	0	3.19101e-19	0	9.22562e-20	3.12874e-18	0.00492183	1.19414e-18	0.000138338	0	2.75452e-20	2.24747e-20	0.0114206	0.0606616	0	0.00412229	3.44301e-19	0.00371458	0.453963	9.62509e-20	0.0508546	6.27516e-19	0.00156787	0.000601179	0.0837552	0.0432435	4.18579e-19	0.0491103	0.0349802	0.0104971	0.0123767	0	0.00216752	0	0.0235109	0.011183	0	0	0.0657719	0	0.00296882	1.08332e-18	0	0	1.81691e-18
TCGA-24-0966	0.15911	0.00610047	0	0	0.17814	2.11206e-19	0	0	0	3.3615e-19	0.00195697	7.73185e-19	4.02443e-19	3.12332e-19	0.0193726	5.1569e-18	0	0.138533	1.94147e-17	0.00352014	0.0176803	0	0.389151	0	0.0330635	1.43051e-17	0	0.04423	0.0757767	0.0438544	0.00788298	0.0270553	0.0261684	0.00577385	0.0016024	0	0.00110021	0	0.0627612	0.00884933	1.13436e-17	0	0.0881226	0.0206168	0	5.93612e-19	0.0017902	1.88893e-18	5.93159e-18
TCGA-29-1783	0.235182	0.000565922	0.0838866	0.0197459	0.0574305	1.13604e-20	4.11623e-19	0	0.0344834	0.00822083	0.000175305	0.0105014	0	0	0.0530769	0.0809227	0.00758485	0.0369759	3.9399e-19	0.0104636	0.0191461	0.00831423	0.307809	8.41581e-19	0.110589	0	0.0014967	0.0389971	0.0200685	0.0383707	0.0044677	0.0767246	0.0624945	0.0209213	0.0182118	0	0.00389678	0.000892119	0.018593	0.0146389	0.0194047	0	0.0279748	0.0112465	0.00650942	8.39827e-20	0.00100651	7.81381e-19	0
TCGA-24-1413	0.130354	5.20426e-19	0.0473485	0.0378223	0.0818103	0.00593695	0	4.32586e-18	0.0508916	0	0.00497608	0.00174279	7.26193e-20	0	7.12814e-05	0.00975334	0.0140555	0.0477755	0	0.00157247	0.0246259	0.000248264	0.292188	0	0.0243543	0	0.0023929	0.0163516	0	0.0199429	0.0051894	0.0167863	0.014355	0.0133539	0.00999192	0.00239686	0.000395291	0	6.88615e-20	0.0118686	0	0	0	0.00974632	0.00298005	0	0.00189708	0	0
TCGA-13-1496	0.312529	0	0	0.056764	0.0166743	0.0197917	0	3.03493e-18	5.39653e-18	0.0507769	0.0110191	0.03813	0.0594599	0.00594709	0.0144865	0	0.00485015	0.0616502	1.43075e-18	0.00566609	4.1085e-20	5.62918e-18	0.40853	2.25722e-20	0	2.98817e-18	0	0.0273571	0	0.0449926	0	0.110483	0.0776358	0.0362405	0.00862654	0.00114601	0.00501893	9.14655e-20	0.0158762	1.66325e-18	0.0105901	0	0.0529105	0	0.00439397	0.00511523	0	4.51541e-22	0.0314923
TCGA-24-0970	0.0999283	0.00133664	0.200655	0.0173824	0	0	1.83813e-18	0	0.0104732	0	0	1.35342e-18	3.60883e-18	0	0.0102178	0.0149693	6.10453e-19	0.0514043	0	5.89649e-20	1.59857e-19	0	0.299446	1.00936e-18	0.0358603	6.29402e-18	0	0.0578601	0.0152224	0.0253355	6.42213e-21	0.0327924	0.021391	0.00214692	0	1.58524e-05	0.00781961	0.0044291	0.0367711	0.0494445	2.43725e-18	0	0.24099	6.2505e-19	1.05696e-20	1.7915e-20	0.00220373	0	0
TCGA-61-2110	0.00136391	0	0.0516317	0.0940442	0	0	3.29483e-18	0	0.0500275	3.00145e-19	0.00397317	0.0134969	5.76516e-19	0	0.029929	0.0280745	0.0179248	0.0257387	0	0.00532205	2.56336e-18	0.00150049	0.303405	0	0.0453031	0	0	7.06867e-05	0.111688	0.0429648	7.68979e-20	0.0188242	0.00471	0.0076254	0.0103052	0	1.08347e-18	0.0205816	0.0440474	0.00798904	7.89853e-20	7.01432e-18	0	1.84024e-18	0.00852278	0.0150595	0.0337925	1.57604e-19	3.76314e-18
TCGA-24-1430	6.52723e-19	5.56493e-21	0.166417	2.58277e-19	0.0280251	0	0	0	0.0242502	0	0.00294654	0.00453102	0.014993	1.6478e-18	0.000321243	0.0234962	0.00245666	0.00437188	0.00111378	3.78239e-20	0.00817717	0.000998604	0.193181	0	0.0205681	3.20194e-18	0.0014696	0.0816838	0.0462474	0.0193992	0.00314533	1.9466e-19	1.79445e-19	0	0.00969163	0.0026725	0.00172031	7.77382e-19	0.0180991	0	0	5.14337e-19	0.0846984	0.00295093	0.0117784	4.792e-18	0.00615566	0	5.52793e-18
TCGA-24-1549	0.151936	0	0.0217353	0.0449498	0.0602358	0.00375984	7.56269e-18	0	0.0151429	0.00696022	0	0.0113694	0.0340808	3.96613e-18	0.0196302	0.0159662	0.0171991	0.0171286	0	0.00422819	5.23756e-06	0.00120271	0.350401	3.63546e-20	0.0203286	0	0.000754003	0.0132137	0.00134374	0.030174	0	0.0162367	0.0183393	0.0109985	0.00698506	0.000562018	0.00261864	0	0.016912	0.0857773	2.19435e-18	9.90954e-19	4.83826e-20	0	0.00240813	0.00179041	0.000709603	0	0.00808461
TCGA-24-1552	0.0626224	0.000199282	0.108773	0	0.0641591	2.60359e-20	0	3.34482e-19	1.67679e-19	4.36389e-18	0	4.75053e-19	0	2.04857e-20	6.96238e-19	0	8.15618e-19	0.044085	0	1.35138e-19	0.00458416	1.11972e-18	0.456163	4.11497e-18	0	1.0067e-18	0.00036381	0.004572	0.00743965	0.0540998	0.00102606	0.0378285	0.0160749	0.0226961	0.00686959	0.000422133	0.0068556	4.42498e-19	0.0363816	0.00970794	0	1.42792e-18	0.0301011	0.00219922	0.0031846	0	0.000235382	0	5.60455e-18
TCGA-36-1574	0.169906	0.00682821	0.238759	0	0.0947907	0.0122156	0	0	2.23503e-18	7.81984e-22	3.40934e-20	1.51943e-18	0	2.4457e-18	0.0412343	0.00160895	1.93544e-18	0.108461	0	0.00566674	0.0073881	6.86027e-18	0.358034	0	0.00138726	0	0.000154034	0.053106	0.0331058	0.0284474	0.000834731	0.047931	0.0375106	0.0145893	0	0	0.0091497	2.15396e-21	0.0351069	0	6.72869e-19	5.43309e-19	0.165879	0.00566156	0.00609685	2.75308e-19	0	1.67653e-18	6.21013e-18
TCGA-61-2002	0.277953	0.00336045	0.304022	0.0408319	0.0794831	0.0119101	0	4.17042e-18	0	0.0349005	9.01051e-05	0.0149038	0.0483587	0	0.0674167	0.0232067	0.0176392	0.0268046	0	0.0115124	0.00323673	0	0.358401	9.8681e-19	0.0515306	0	3.10504e-20	0.0466475	0.0169803	0.032687	0	0.0970915	0.0544019	0.027209	0.000727879	0	0.00753172	6.51051e-19	0.037105	0.00577168	0.0177656	5.55217e-18	0.190941	0.0067129	0	1.40122e-18	0	0	9.79122e-18
TCGA-24-1434	0.241876	0.00231627	0.384953	0.0351018	0.00570399	0.00525987	0	6.39488e-19	0.00522368	0.00252885	0	0.00603077	0.011402	6.11836e-19	0.0517747	0.0803134	2.19186e-20	0.0277036	0	0.00748597	0.0106162	2.17531e-20	0.20375	3.50168e-19	0.0487706	2.07475e-18	1.56847e-21	0.0802886	0.0596196	0.0235717	0	0.102356	0.0643493	0.0305451	0.00858951	0.00217197	0.00168768	5.05291e-19	0.00635782	0.0161573	0.0422434	0	0.229791	2.66056e-20	0.0085148	0.00399466	0.00140364	2.43391e-19	0
TCGA-61-1998	0.188682	0.000169492	0.167798	1.84792e-19	0.0309067	0.0024493	6.52044e-19	1.4549e-18	3.82124e-18	5.07151e-19	1.5751e-21	4.59589e-18	0	8.89831e-18	0.0417566	0.0626213	0	0.0404906	5.07758e-20	0.00953738	0.0630184	0	0.32871	0	0.130694	1.3578e-18	0.00178787	0.057071	0.110242	0.0276738	0.0212165	0.0689233	0.0568892	0.025486	0.00793084	0.00342523	0.00105276	1.16032e-19	0.029559	0.0283388	0.0371047	7.006e-20	0.0312456	0.0371304	0.000301696	5.13043e-20	0.000495317	1.89671e-19	0
TCGA-09-2044	0.19709	3.48228e-22	0.0625386	0.0382853	0.000877585	0.0161311	1.30107e-18	0	0	0.00310131	0.0166275	0	0.0122271	1.80692e-18	0.00706718	0.0212763	0	0.0611059	0	0.000211115	0.0199253	0	0.239424	1.13313e-18	0	0	0	0.0131001	0	0.0275195	0.00445048	0.106939	0.0701009	0.02945	0.00231244	0	0.00135119	0.000949264	0.0625696	0	0.0160461	9.66668e-19	0.0699555	0.0145017	0.00112724	0	0.00373124	1.8814e-19	2.78866e-18
TCGA-24-0982	0.0559734	0	0.135951	0.0115971	0.000748413	2.71544e-21	4.07891e-18	0	0.0119383	0	0.0190672	0.0334701	2.33385e-19	0	0.0246687	0.0479345	4.33198e-19	0.0448705	3.21552e-18	0	0.0156334	0	0.319537	1.61554e-18	0.0793825	0	0.000966806	0.0442511	1.13299e-17	0.0282145	0.0049528	0.000772456	0.00355794	0.00118667	0.0128866	0.00201209	0.000400392	0	0.0544083	0.0056586	2.05419e-18	5.93549e-19	0.0940059	0.00426029	0.0118617	1.25615e-22	0.0035303	0	0
TCGA-29-2427	0.289408	2.00063e-19	0.108076	0.050745	0.0692013	0.010196	0.00708516	5.60746e-18	2.54449e-19	0.0442079	0.00183872	0.044598	0.0839762	0.0151856	0.021775	0.0636526	0.0163287	0.0285278	0	0.000487259	0.00654017	8.79683e-18	0.259233	0	0.0163096	2.25174e-18	0.000348957	0.113714	0	0.0259795	0.00138737	0.167785	0.125609	0.0563018	0.00420334	3.32437e-21	0.0088915	2.91162e-18	0.0211706	0	0.019401	0	0.132798	0.00570466	0	1.86386e-19	0.000152835	3.15002e-19	0
TCGA-13-0887	0.161423	0.00151038	0.0487402	0.0181921	2.38637e-18	4.68845e-20	0	0	1.33252e-17	0.00887001	1.51442e-19	0	1.65627e-18	0	0.00300677	0.0073071	3.28837e-20	0.0936254	0	2.6053e-19	0.00120155	0	0.348579	0	0.0324657	0	0	0.0083339	9.54092e-19	0.0303123	0.00149363	0.0515888	0.0499624	0.0080366	0.000646515	0.00133954	0.00268181	4.96063e-19	0.0431783	0.0107843	4.0604e-18	9.26972e-19	0.0851056	0.000881548	0	0	0.00134715	2.63611e-19	0
TCGA-61-2009	0.211036	0.00878988	0.176588	0.00784724	0.0405214	0.0085215	9.73919e-19	6.25774e-19	0	0.0037175	0.00466686	0.0240061	0.0247485	0	0.0282428	0.0379827	0	0.100207	9.82672e-19	0.00609397	0.0259477	8.3082e-19	0.388945	0	7.75064e-19	4.81115e-19	2.16242e-18	0.00710015	0.0952655	0.0365924	0.00899557	0.103446	0.0478773	0.0534598	0	0	4.09797e-21	1.47175e-18	0.0298309	0.00596154	0.0186386	3.65256e-18	0.246194	0.0133091	0.00301882	2.63342e-19	0.00286979	0	0
TCGA-25-1319	0.179643	0.000312075	0.0143839	0.0199588	0.0483208	1.63523e-23	0	6.94745e-19	0.0313523	0.0218427	0.006421	0.0225961	0.0136312	6.73183e-19	0.0199076	0.00603536	0.000396332	0.0377453	0	0.00432761	0.0354616	0.00341424	0.233752	7.75454e-19	3.73742e-18	0	0.000476329	0.023696	0	0.0204072	0.015423	0.050758	0.0135047	0.0337105	0.0116754	0.00491259	0.0179697	7.94585e-19	0.0206078	0.00149115	3.7856e-21	2.51814e-18	0.0339727	0.0193252	0	0.0027492	0.00206877	4.15454e-19	9.51972e-18
TCGA-59-2363	0.00674839	0	0.145165	0.000205578	0.0345693	0	1.64585e-18	7.33225e-19	9.23547e-19	6.14154e-18	0.002755	0.00365361	0	0	0.013085	0.0203029	9.25116e-19	0.0389478	2.33873e-18	1.90041e-19	1.35282e-20	0	0.223642	1.18777e-18	0.0139064	3.93113e-18	0.00173869	0.021697	0.0348679	0.0181044	1.07379e-18	0.00203449	0.00172626	7.20764e-19	0.0058429	0.000182484	3.3825e-19	0	0.0491679	0.0503268	6.70195e-20	4.45558e-19	9.68492e-18	1.08455e-18	0.00981764	0.000238314	0.0037593	0	0
TCGA-25-1635	0.198625	0.00783442	0.32899	1.60567e-19	0.00278617	0	3.18369e-19	0	0	0.0172666	0.000318716	0.00963664	0.0069991	1.08197e-18	0.0157823	0.0826614	2.81531e-19	0.0384698	2.53602e-19	0.00251856	0	0.00237908	0.218955	1.75173e-19	0.0491044	2.74437e-18	0.000281724	0.112627	0	0.0120317	0	0.0626075	0.0426042	0.0249367	0	0	0.00902889	0	0.0106142	0.011266	0.00441992	0	0.169598	0	5.6067e-19	1.73137e-18	0.00316468	0	6.89281e-18
TCGA-24-1551	0.232582	8.05486e-19	0.0640392	0.0440425	0.0841285	0.000569671	0.0118583	0	0.00101409	0.00302649	0	0	0.00669141	0	0.0663284	0.00685725	0.00610595	0.0426221	0	0.0107014	0.00348713	1.04216e-19	0.424246	0	0.0207069	1.19341e-18	0.00210128	0.0100727	0.0171099	0.041447	0.00094404	0.0704122	0.0600052	0.0172187	0.00245938	1.46137e-19	1.63636e-19	0	0.0281097	0.018399	0.0342382	0	0	0.00567049	4.86713e-20	0.00342729	0.000579728	0	0
TCGA-29-1703	0.083882	0.00089301	0.125809	0.0303616	0.00570349	0.00330401	2.14005e-18	5.22986e-19	0.0198639	7.78084e-18	0.00741066	5.79256e-19	2.37962e-19	6.47858e-19	0.0104843	0.0378691	0.0291726	0.0526589	0	0	0	0.00699674	0.376223	0	0.0746825	8.42982e-19	0	0.0476625	0	0.0282062	0	0.0114011	0.00495396	0.00752292	0.0107252	0.000955646	0	0	0.0455281	0.00958423	7.72252e-19	5.3367e-18	1.73906e-17	0	0.00409747	7.48494e-19	0.00392025	0	1.20914e-18
TCGA-23-1030	0.153303	0.00058499	0.10565	0.0112321	0.0351358	5.45059e-21	5.82733e-19	1.91175e-19	0.0387673	0.0129159	0.00667739	0.0144349	0.000852473	0	0.0227143	0.0271199	5.67698e-19	0.0509863	0	0.00690121	0.0208832	0.00505259	0.290292	0	0.0135502	0	0.000977901	0.0140504	0.00279696	0.0535068	0.0138042	0.0259223	0.0227169	1.69407e-21	0.00167602	0.00166838	0.00645832	0.000164536	0.0309087	0.0411481	1.57548e-19	3.10313e-18	0.0534697	0.00910167	0.0360534	0	0.00141367	5.21709e-20	0
TCGA-25-2398	0.155818	0.00183732	0.425539	0.0128864	0	0	0.00146669	2.6872e-18	0.0247386	2.09079e-19	0.00164017	0.0135303	0	2.50094e-19	0.0699111	0.060384	4.30492e-20	0.0152108	1.11343e-18	0.0112804	1.84887e-19	0.0104717	0.227474	0	0.0322234	0	0	0.0317503	0.137636	0.0218905	1.24074e-19	0.0301021	0.0330302	0.00585966	0.00194641	0.000602202	0.00690243	6.86068e-19	0.011366	0.100431	0.0131355	0	0.240123	1.94723e-19	0.00558255	5.42101e-20	0.0058165	3.53787e-19	0
TCGA-30-1891	0.16507	0.000759763	0.228352	0	5.00726e-18	0.0116444	3.24107e-18	5.03585e-18	0	0.0184611	0.014649	0	0.0116789	3.30479e-19	0.00644932	0.0654668	1.222e-19	0.0650488	0	0.000454732	0	3.28216e-19	0.31064	5.28795e-19	0.0573824	0	3.49995e-19	0.136648	0.0303587	0.0397493	0	0.0720281	0.0302753	0.0373912	0	0.000600863	0	4.11142e-18	0.042854	1.4642e-18	3.82556e-20	1.37791e-20	0.182671	4.8012e-19	7.76168e-20	1.15516e-19	0.00128474	0	0
TCGA-61-1914	0.205969	0.00119002	2.77348e-18	0.00982281	0	0.0224231	1.90824e-18	6.181e-19	0	0	0.0150159	8.31367e-20	0.0153915	9.74214e-19	0.016054	0.0013527	0	0.170174	0	1.66106e-19	0.00456183	4.55856e-18	0.280827	0	0.0266407	0	0	0.0610617	1.05579e-18	0.0273473	0.00046999	0.116181	0.0660464	0.0662591	0.00219423	0.00169659	0.00970201	0	0.0170055	0	0.0110915	1.39201e-17	0.0795037	0.00498744	0.00891426	0	0.000434676	0	0
TCGA-24-1427	0.194506	0.0231025	0.302997	0.0127879	0.0118273	0	3.87133e-19	0	0.0232204	0.0096975	0.00320313	0.0320657	0.00635303	0	0.0463522	0.033597	0.0189093	0.00786399	3.37784e-19	0.00570488	0.0019844	0.0100201	0.367338	0	0.119607	2.94891e-18	0.000147125	0.0644342	0.0186227	0.0421858	0.00231973	0.0497042	0.0364597	0.0358652	0.00102677	0.00375485	0.000220662	0	0.0147219	0.0443789	0.0105469	4.20146e-18	0.17462	0.00441557	0.000945299	2.72115e-18	0.000981143	0	8.65232e-19
TCGA-09-1667	0.260222	2.56968e-19	0.0867388	0.0205919	0	0.0164339	0.00774606	1.78584e-18	1.03083e-18	0.00418447	0.00132336	0.0195788	0.0264734	1.47592e-19	0.0315763	0.00610181	0.00934536	0.0728845	0	0.0106404	0.0123618	0	0.293747	1.01898e-19	0.0467797	1.50943e-18	0	0.0404778	0	0.0211655	0.00151548	0.0603552	0.0470868	0.00455412	0.00505647	0.00145138	0.00764922	1.00731e-19	0.0207832	0.0249904	0.0168362	0	0.0117982	0.00508783	0.00334773	0	8.1066e-05	0	1.10127e-19
TCGA-24-2033	0.134073	0.00120725	0.198842	0.0811359	0	0.00147867	0	5.19347e-18	3.05665e-05	5.4581e-18	0	0.00325796	0	6.87995e-19	0.00431721	0.0345008	0.00351018	0.0379517	6.01529e-20	0	0.00117333	0.00304089	0.257066	0	0.116331	1.18893e-18	0.00101545	0.0266551	0.0102416	0.0257225	0	0.0416796	0.0263034	0.0172379	0.010488	0.00099414	0.000676681	0.00534995	0.0377464	7.29947e-19	0.000466508	0	0.0905338	0	0.0170491	0.00953321	0.00193903	0	0
TCGA-25-1317	0.0180176	0.000252239	0.192728	0.0153323	0.00120713	0	5.78773e-21	1.95032e-20	0.0416411	3.93291e-18	0.00426802	0.016472	0.0104955	0	0.0233315	0.0932315	0	0.00949801	3.2089e-19	8.58725e-22	0.00445498	0.0132549	0.309379	4.39529e-20	0.0549439	8.08999e-18	0.0012071	0.0635679	0.0665845	0.0384189	0.00174586	0.000304944	0.00201083	0.00118223	0.014796	0.00195012	0.00146367	0	0.0241979	0.0965812	2.65977e-19	0	0.00304562	0	0.0170522	2.08582e-19	0.00453948	0	0
TCGA-23-1120	0.266435	0	0.0860548	0.0378188	0.0753115	0	0.000683568	0	0.0125399	3.59092e-18	0.00178663	0.0331832	0.0369952	0	0.0351384	0.0302753	0.0131407	0.0561709	7.48361e-19	0.00676078	0.018623	0	0.293003	0	0.0639055	0	0.00145479	0.023384	0	0.0271035	0.0034566	0.0526676	0.0555351	0.011192	0.00986413	0.000289555	0.00212347	8.09374e-19	0.000953612	0.00187707	0.0055888	0	0.019304	0.00676323	0.00555457	0	0.00044749	0	4.23711e-18
TCGA-61-1918	0.177053	3.79634e-05	0.0424323	0.0313946	0.0749898	4.60668e-21	1.62651e-19	0	0.0134569	0.0385245	1.05414e-19	0.0070941	8.21343e-19	1.98219e-18	0.026262	0.0265447	0.00140432	0.033202	0	0.00715102	0.0202446	2.46799e-19	0.276552	6.24423e-19	0.0770998	0	0.00171465	0.0230439	0.0168369	0.0182283	0.00419448	0.0464652	0.0205763	0.0263162	0.00932284	0.00145854	0.00121783	0	0.0256273	0.0118329	0.00645725	0	0.0389206	0.0135981	0.00416114	0	0.000390055	3.47589e-19	3.05387e-18
TCGA-09-0369	0.0713693	0.00685581	0.271959	0	0.0500202	2.08307e-19	0	5.36786e-18	0.0171763	4.42305e-18	5.10858e-19	1.64903e-19	5.88266e-19	0	0.0220641	0.00947108	4.15929e-18	0.0421772	4.51011e-20	0.00155097	0.0913191	0	0.160103	1.69061e-18	0.0509066	5.50121e-18	0	0.100319	0.185527	0.0114435	0.0288855	0.0170787	0.0233832	0.0197915	2.72548e-20	0.00303603	0	0	0.0746575	0.0103392	2.44729e-18	0	0.314065	0.0758118	0.0323588	0	0.0127139	7.41577e-19	0
TCGA-24-1474	0.17654	1.83035e-19	0.0983385	3.85008e-20	0.0505151	0.000971115	4.36737e-19	0	5.16209e-19	0.000291801	0	0	7.019e-19	0	0.0325276	0.00609146	0	0.0281538	4.54459e-18	0.00471375	0.0178617	0	0.188305	2.87618e-19	0.0147613	0	0.00228755	0.122721	2.43875e-18	0.0140054	0.00436262	0.0500087	0.0469845	0.0219928	0.00847879	0.000829656	5.00569e-18	7.24305e-18	0.0465591	0	0.0193663	0	0	0.00687351	0.00263372	0	0.00333635	0.00271882	4.47441e-19
TCGA-23-1026	0.21769	0	0.22969	0.024185	0.0411494	0.00290983	0	2.14088e-18	0	3.50534e-20	0	3.28658e-22	0.00752727	0	0.0196286	0.0115856	0	0.0833821	3.13679e-19	0.00602917	0.0116401	0.00416732	0.426557	1.20669e-18	0.0463298	0	0.00134685	0.0110642	0.0104246	0.0599316	0.00329071	0.072337	0.0488298	0.019235	0.00173997	2.99054e-19	0.0234555	0.00159098	0.0226327	0.00676617	0.00325212	0	0.0885366	0.0108845	0	2.8619e-19	0.000492405	3.71482e-19	0
TCGA-09-1659	0.175706	0.00172295	0.0241283	0.0115017	0.0752883	0	0	0	0	0.0176546	0	8.41214e-19	0	5.59278e-18	0.0180057	0.00284555	5.6054e-18	0.106707	0	7.42814e-20	0.0175639	0	0.42822	0	0.030009	0	0.000910754	0.0413687	9.15558e-18	0.0406284	0.00489027	0.0488813	0.0346124	0.0091572	0	0	0.000139695	1.38418e-19	0.0646368	0.0337864	0	9.6979e-18	0.170263	0.0205836	0	4.0813e-18	0.000601417	0	4.44345e-18
TCGA-24-2027	0.0243539	9.98935e-20	0.104875	1.14802e-19	0.0371132	0.00493253	0	2.36607e-18	0	2.20083e-18	0.00201753	1.55529e-19	0	4.31087e-19	0.00408754	0.0171324	0.00695024	0.0327552	0	0.00164214	0.00446638	0	0.366552	0	0.0301949	0	0.00217596	0.0280103	0.0685974	0.0415829	0	4.90804e-23	0.00507218	0.00767148	0.00784436	0.0022622	0	2.59076e-18	0.0412174	0.0810428	2.19209e-18	0	0	0.000579043	0.01192	4.4427e-19	0.00163846	0	0
TCGA-25-2393	0.08897	0.000215256	0.153343	0.00408303	0.070735	0.00705425	2.49507e-18	0	0.00354487	1.58325e-18	0.0205982	0.0250066	2.37224e-18	1.00268e-17	0.012623	0	0.0147848	0.101668	0	0.00658784	0.00253855	4.22703e-20	0.228972	7.59146e-19	0.0151915	5.15809e-19	0.000771617	0.00786803	0.1061	0.0148619	5.42101e-20	0.0147058	0.0109871	0	0.00728277	0	0.00129077	0	0.0629657	0.00218227	0.00378186	1.11309e-18	0.101088	0.000754162	0.00878843	6.48895e-19	0.00500775	0.000661085	0
TCGA-23-1110	0	0.00149133	0.157231	1.38117e-18	0.0807426	0	0	4.20665e-18	1.23165e-20	0	0.0125073	7.5781e-19	0	0	2.41736e-19	0.0671339	0	0.041456	0	0	0.0248111	0	0.261269	0	0.0557826	0	0.00210375	0.116102	0.000179887	0.0247002	0.00529919	1.28279e-18	0	0	0.00188954	0.000542203	0	5.72748e-18	0.1002	0.0149158	7.96606e-18	2.47932e-18	0.0606897	0.0285439	0.0102975	0	0.0116844	1.23833e-18	1.41546e-17
TCGA-OY-A56Q	7.97173e-19	3.4108e-21	0.0283314	0.00879095	0.0167122	0.00242964	2.79529e-19	4.19308e-19	0.0540444	1.94979e-18	0.000340187	0.0492457	0.00716246	1.22145e-18	0.00842878	0.0439909	0.00330641	0.00460533	0	0	0.0196923	0.00687994	0.216883	1.59066e-19	0	4.33617e-19	0.000317369	0.0850881	0.00453634	0.0165574	0.00959051	1.76199e-19	1.92749e-18	0.00187592	0.022847	0.00398464	0.000134425	7.6364e-18	0.035206	0.0323077	0	4.04647e-18	0	0.00277367	0.0252828	0.00319502	0.00573175	1.54675e-18	0
TCGA-23-1021	0.0827861	0.000735165	0.0105293	0.0300456	0.0170179	1.64658e-20	2.86528e-18	0	0.0138559	0.0151077	5.34041e-21	4.61662e-21	0.0101856	2.42291e-18	6.69203e-20	0.0834781	0.00615736	0.0291145	3.24144e-19	0.00137082	0.00613616	0	0.431609	0	0.123572	0	0	0.0696206	0.00151836	0.0556157	0.00836093	0.0229514	0.00882868	0.0152645	0.00885292	6.28404e-22	0.00637472	7.75876e-19	0.0445129	0.020143	2.68573e-18	0	0.061095	0.00279074	0.00190061	0	0.00358585	1.19398e-19	0
TCGA-04-1514	4.51262e-18	7.4648e-19	0.0874694	0.0104583	0.0278629	0	0	0	0.0203061	0	1.19819e-18	0.00200686	0	0	0.00418224	0.0454372	0.0142011	0.0261978	0.000725727	0	0.00630311	0.0114884	0.147078	3.82921e-19	0.057176	0	0.00151327	0.0584954	0.0641423	0.00827568	0.000341192	0	3.68929e-18	0	0.00491733	0.00334734	2.18905e-18	0	0.0309622	0.072337	2.83225e-18	0	0	0	0.0169535	0.00288921	0.0185336	0	0
TCGA-23-2077	0.203323	1.62591e-19	0.0846687	0.0355571	0.0243592	0.000143958	5.2906e-19	4.50821e-18	0.0178357	0.0029733	0	0.0139817	0	0	0.0199103	0.0355884	0	0.0201001	0	0.00647076	0.0174227	1.13803e-18	0.32359	1.54022e-18	0.0881356	0	0.00105924	0.0730113	0	0.0273794	0.00393363	0.0454153	0.0336971	0.024011	0.0133376	0	0.00604419	0.00112145	0.046675	0.000784075	0.00819455	7.28779e-18	0	0.00296936	0.0107989	7.13301e-19	0.00231731	3.22653e-20	4.15483e-19
TCGA-25-1628	0.264753	0.0130719	0.357468	0.0260857	1.35424e-18	0	0.0129128	3.74718e-18	0.0140295	1.20789e-18	0	0.0530348	0.0277523	0.00585854	0.0372484	0.0859158	0.000606743	0.015291	0	0.00543626	0.011531	0.00341776	0.199751	0	0.0833923	0	6.97475e-19	0.0974881	0.0102246	0.0112209	0.00172726	0.0492933	0.0490416	0.0184867	0.00585342	0.00263242	0.00501925	4.87184e-18	0.0143615	0.0377045	0.00169308	0	0.100787	0.000649845	0.00559921	0.00676889	0.00226763	0	0
TCGA-09-1661	0.0762989	5.49846e-21	0.0512745	0	0	0	0	2.27814e-19	0	1.9143e-18	0.00185386	0.000859182	0.021436	1.61916e-18	0.0101489	0.0458304	0.0175664	0.0443377	6.1036e-19	0	0.0367454	1.93934e-19	0.308326	0	0.13072	0	9.03365e-05	0.110274	1.43352e-19	0.0248008	0.0111246	0.0173711	0.00404626	0.00930432	4.07854e-19	0.00160166	0.00232757	0	0.0202142	0.0675593	0	1.94737e-19	0.0114705	0.0095055	0.006142	0	0.00297108	3.09749e-19	1.29431e-19
TCGA-25-1316	0.0872247	0	0.149591	0	0	9.24927e-19	0	0	0.0147083	8.98802e-20	0.00915237	0.0330537	0.0358621	0	0.0278772	2.50225e-19	0.0149519	0.0263355	0	0.00575306	0.00998401	0.00147363	0.211992	1.38395e-19	0.0488415	0	0.000720183	0.161207	0.109888	0.0137742	0	0.00290543	0.0105966	0	0.00135812	0.00318036	0.000596563	0	0.0257473	0.0533237	0	7.03661e-18	0	0	0.00316621	1.94607e-19	0.00865322	0	0
TCGA-61-2092	1.62436e-20	0	0	8.91924e-22	0.137917	3.66423e-20	8.4091e-19	0	3.86799e-18	0.00943901	0	0	0	4.5354e-18	0	1.17423e-17	0	0.0635581	0	0	0.0004931	0	0.442095	2.37117e-18	0	4.05003e-18	0.00199464	0.000267641	0.0112032	0.0536235	0	0.00521984	0.00333884	0.0104867	0.00822212	0	0.00403814	0	0.0762041	3.78784e-18	6.08349e-19	4.58565e-18	0.0113441	0.00184365	0.00324596	0.000107728	0.000139121	0	2.97018e-17
TCGA-61-2111	0.107278	1.79e-19	0.0338518	0.0352196	5.8429e-18	0.00597409	1.01449e-18	0	0.0328049	3.98129e-19	6.9474e-20	0.0277428	0.0412595	0	0.0233818	0.0112489	0.0157634	0.00913575	0.000417585	0.0130618	0.0131875	0.00880872	0.320245	0	8.79218e-19	3.15985e-19	0	0.0251897	0.108022	0.012738	0.00183705	0.0318546	0.0161239	0.0144752	0.00525513	0.00218499	0.00295975	0	0.0154564	0.0533571	0.00517679	0	5.23789e-19	0.00518386	0.00888038	0.00873972	0.00187875	2.27138e-19	6.34096e-20
TCGA-25-1322	0.190134	0	0.145698	0.0314325	0.0405929	0	0	2.47335e-18	3.06063e-19	0	0	1.20447e-19	9.68244e-21	0	0.0260844	0.0322939	0.0052046	0.0325729	0	0.00350932	0.00801347	0.00576739	0.349618	1.53431e-19	0.0866708	9.12902e-18	0.0018575	0.0301126	0.0162385	0.0348585	0.00210924	0.0572189	0.0594421	0.0128042	0.0181426	0.000714291	0.00921223	0.00207538	0.00339211	0.0481315	0.0147258	1.55874e-18	4.5518e-18	0.00850938	0.0017428	0.0034779	0.000312188	0	0
TCGA-23-1111	0	0	0.0970026	0.00848493	0	5.5658e-20	0	0	0.0299382	0	0.00250817	0.0044654	0	0	0.000178112	0.0331656	0	0.0471604	0	2.73331e-19	0.00209376	2.58178e-19	0.355161	3.27478e-18	0.0500578	0	0	0.0659	0.0212008	0.0344003	0	0.00509102	0.00237509	0.00444083	0.00875295	0.00115528	0.00412823	0	0.0450222	0.0247003	0	0	7.58285e-19	2.9155e-18	0.00162494	4.18649e-19	0.000955711	9.10983e-19	5.22192e-18
TCGA-WR-A838	8.75143e-19	0	0.0351198	0.0173935	0.0840356	0	0	0	0.0504805	3.96483e-18	0.0125077	0.00867432	0	0	0	0.0263212	0.00674166	0.0247247	0	8.64056e-19	0.0159527	0.00274046	0.215569	0	1.88802e-19	1.14447e-17	0.00205913	0.0204444	0.00216425	0.0208714	0.00700697	0	0	0.00163088	0.0200923	0.00329968	0.00274967	4.80868e-19	0.0434626	9.63493e-19	0	1.88954e-18	0.0303833	0.00414142	0.0136201	0.00373658	0.0055141	0	0
TCGA-10-0936	0.171329	5.00792e-19	2.05087e-19	0.0304557	0.133679	2.41685e-18	3.84114e-18	0	0.101874	0.019672	4.42597e-19	0	1.63488e-17	2.66615e-18	0	0	0.0338307	0.0353157	0	0.00258677	0.0149218	0.00729016	0.377504	3.37573e-18	0	1.59411e-18	0.00342509	0.0112802	0	0.0286269	0.00421204	0.00437808	0.0165554	0.0199749	0	6.98511e-20	0.00262297	3.70802e-18	0.0690806	0	0	2.21518e-19	0.109692	0.0288184	0.000294672	8.01204e-18	0.000588578	0	9.8482e-18
TCGA-24-1553	0.273806	1.33793e-18	0.0920009	0.12494	0.0623625	0.00621462	0	0	0.0442848	0.051488	0.00655187	0.103214	0.108664	0.0248293	0.0733337	0.0344167	0.0173086	0.0123768	0	0.0104262	0	3.17635e-19	0.355003	2.11472e-18	0.0451506	1.62201e-19	0.0021694	0.00893083	2.25754e-19	0.0428013	0.000475826	0.0755566	0.0656724	0.0178642	0.0189821	0.000312636	0.000830161	0.0229655	0.0179759	0.0125666	0.0140894	1.27523e-18	2.04918e-18	6.00894e-05	0.00933135	0.00420084	0.00199023	0	0
TCGA-09-1662	0.172661	3.91651e-20	0.112203	0.0326375	0.0731064	0.00241868	0.00226284	0	0.0180699	0	2.77794e-21	0.00738131	0.0286114	1.42094e-18	0.0571809	0.0292061	0.0151304	0.032004	1.3474e-18	0.0117897	0.00387765	0	0.35316	7.15133e-20	0.0887219	5.28229e-19	0.00146222	0.0324183	0.0393581	0.0368322	0.0010705	0.048834	0.0474211	0.00202117	0.00983485	8.35382e-05	0.00287531	1.33346e-18	0.024208	0.0610593	0.0276047	4.51693e-18	1.6632e-19	0.00629015	0.00106193	6.56601e-20	0.000732253	0	4.34046e-18
TCGA-24-2035	0.174877	0.0313353	0.260209	0	0	3.60821e-19	0	2.2012e-18	0.00998087	0	0	0	0.00888313	0	0.145841	0.104717	0	0.0179757	0.000555202	0.0495289	0.144579	0	0.261805	0	0.28463	0.0100814	0.00151943	0.47516	0.664991	0.0193476	0.0547895	0.0659944	0.0579221	0.0229756	0.00348187	0.0180911	0.00206691	1.00452e-17	0.00888336	0.0120033	0.0632857	5.2092e-19	0.0945853	0.0897748	0.00179071	0	0.000332935	0.0015386	0
TCGA-24-1565	0.194737	6.59855e-19	0	0.051613	0.182757	0	1.46319e-18	0	0.0420441	0.0414465	4.71889e-20	0.00197583	0.0137163	0	0.0170269	0.00597903	0.0547259	0.0464903	0	0.00373767	0	0	0.333821	3.98995e-18	9.1759e-19	0	0	1.10615e-20	0	0.0258089	0.000757703	0.0479752	0.0236508	0.0286286	0.0149395	7.37056e-19	1.46256e-20	0	0.0222692	8.99118e-19	1.1793e-18	0	1.78472e-17	0	4.61761e-20	0	5.73731e-05	0	0
TCGA-31-1953	0.331794	0	0.196355	0.0401152	0.119584	0.00382303	0.0122638	0	9.01701e-21	0.0148018	9.87023e-21	0.0161558	0.0317146	6.12983e-18	0.284326	0.0179343	0.0178662	0.0485299	4.60004e-18	0.0495161	0.0196559	0	0.334163	1.36059e-18	0.0212055	0	0.00106041	0.0110127	1.59742e-17	0.0213755	0.0035496	0.0882766	0.0650858	0.0226162	0.0089742	0	0.00665584	3.13593e-18	0.00621292	0	0.0475612	5.27225e-18	0.0214987	0.00756315	0	0.00177379	0	0	0
TCGA-09-1669	0.181051	9.0154e-05	0.139539	0.0790318	0.0266885	0.0154986	0	1.37683e-18	0.0204175	1.90263e-18	0.0170616	0.0176583	0.0305686	4.28976e-19	0.00719092	0.0268084	2.87334e-19	0.0607567	0	0.0118731	0.0152086	0	0.208076	1.27318e-18	0.0443486	0	0.00143631	0.0778171	0.1041	0.0179144	0.00212086	0.0263371	0.0276374	0.00326596	0.00537179	0.0011362	0.000727367	0.0109801	0.0486612	0.0548132	1.03983e-18	3.26793e-19	0.00482876	0.00673317	0.00730039	0	0.00142867	0	0
TCGA-24-2288	0.281341	0.0121849	0.170269	0.127944	0.0339364	0	0	0	0.0277935	0.0134533	2.99835e-22	0.0389841	0.013701	0.00199586	0.0238022	0.00455784	0.00154967	0.0139999	7.02929e-20	0.00703318	0.0195674	0	0.285571	1.15408e-19	0.0583894	0	0.00104924	0.00854494	4.43657e-18	0.0307641	6.12316e-05	0.0434502	0.0358038	0.0121828	0.0203468	0.00172579	0.00342005	0.0220182	0.0105928	5.6649e-19	0.00720252	0	0.0710355	0.0070161	0	0.0151957	5.84192e-05	0	1.24749e-18
TCGA-25-1328	0.0745618	0.00204712	0.2859	0.0337365	0	0	2.8427e-18	0	0.0480056	0.00655375	1.58353e-19	0.0240265	0.0199452	1.82858e-19	0.0917421	0.119432	0.0209796	0.0109373	0.00164605	0.0218199	0	0.00571554	0.248766	0	0.114337	1.68705e-18	0.000145407	0.0398949	0.26102	0.0254899	2.19937e-19	0.00810583	0.00482254	0.00613289	0.00716035	0.00197085	0.00167521	0	0.0117133	0.0701945	0.0177163	0	0.0106536	0	0.00316072	0	0.00152944	8.87794e-19	2.4512e-18
TCGA-25-2400	0.130811	0	0.0207377	0.00114963	0.0743238	2.52923e-20	0	0	0.00400916	0.00273191	0	0	1.37935e-18	0	0.0167073	0.0356473	0	0.0209584	0	0.00452904	0.00291172	0.00242878	0.340067	0	0.0122378	0	0.00192244	0.0203831	9.74263e-19	0.0320935	0.000772934	0.0232173	0.018846	0.0253162	0.00712556	0	0.00528932	1.26791e-18	0.0371401	0.0328346	0	4.19772e-18	0.0239843	6.97011e-20	0	8.17979e-19	0.00113682	0	4.75741e-18
TCGA-24-1104	0.184487	0.00252331	0.0761941	0.0115122	0.0360859	1.00313e-19	0.00359711	0	0	0.0293549	0.0064175	0.0439025	0.0224883	6.94071e-19	0.017158	0.0400605	0.00792189	0.0172215	0	0.00173745	0.00344039	0.00610369	0.426791	0	0.0499938	0	6.7911e-05	0.0919752	2.41634e-18	0.045987	1.02896e-19	0.0527825	0.0409591	0.0141232	0.00519172	0.00129648	0.00201107	0	0.0161665	0	0.00544189	0	0.0328986	0.00271409	2.01022e-18	4.13862e-18	0.00036044	0	6.72304e-18
TCGA-29-1762	0.0457768	0.00185724	0.104658	2.19676e-18	0.0413007	0.00787519	0	0	0	0	0.00891106	9.91594e-18	0	0	0.0339622	0	0	0.0676885	0	0.0024379	0.0185592	0	0.223159	0	0.0194759	0	0.00264097	0.0424114	0.142594	0.0141353	0.00471931	0.0318143	0.0286568	0.00626091	2.6176e-19	0.00166258	0.00265669	1.93485e-18	0.0489265	0.0757719	0.000418516	0	1.10201e-17	0.0109889	0.00686819	1.54124e-19	0.0241264	0.00152191	9.41396e-18
TCGA-24-1419	2.82166e-19	1.77623e-19	1.71527e-18	0.0216124	0.00497022	0.00241419	3.77396e-18	4.02905e-18	0.0157783	0	0.0106347	0.00981115	1.59154e-19	0	0.0017829	4.24262e-18	0.00192011	0.0428696	9.10657e-19	0.00231959	0.00448321	1.35665e-20	0.218178	0	0.0413853	4.52634e-19	0.000850243	0.00946596	0.0821625	0.0163784	0.000478787	0.0128889	0.00199543	0.0116788	0.0133603	0	0.00874428	0.00483699	0.0140674	1.53798e-18	2.88208e-18	0	0.126344	0.00237104	0.0126247	0.00713429	0.00169116	0	3.7301e-19
TCGA-61-2104	0.266758	0	0.0641978	0.0462794	0.0708548	3.43011e-20	8.22284e-20	2.33929e-18	0.0440824	0.0290128	0	0.0237694	0.00883791	3.07403e-18	0.039022	0.0206447	0.0283539	1.20648e-19	0	0.0117246	0.00351639	0.00567329	0.399181	0	0.0181143	1.45258e-18	0.00187203	0.0303527	0	0.0420796	0.00200445	0.0428846	0.0533297	0.0089593	0.0222107	0.0018615	1.06119e-20	0	0.0118938	0.00881607	0.0010919	4.16217e-18	0	0.00307927	0.00432177	0	0	3.83154e-22	0
TCGA-24-1844	0.0272212	2.28808e-20	0.0373353	1.73066e-19	0.0884561	1.12299e-20	2.15453e-18	6.03375e-18	0.00453799	0	0.00718476	3.954e-19	0	0	0.0022051	0.0160141	0.0219113	0.071606	0	0	0.0224711	3.93949e-19	0.264628	0	0.00910209	1.88064e-19	0.00275975	0.0269746	0.0405401	0.021026	0.0105578	0.00763079	0.000119707	0.00599561	0.0151456	0.00212496	0.00138469	2.44916e-18	0.0278561	0.00131479	1.24358e-17	0	0.0900311	0.0143971	0.00903836	4.87434e-20	0.00279099	0	8.40222e-18
TCGA-24-1467	0.104196	0	0.0470912	0.0138963	0.182892	0.00613739	0	1.12396e-18	0.0759542	0.000270153	0	0	0.00150442	0	0.00187915	0.0142498	0.0332265	0.0198971	0	0.00239696	0.00722413	0.00324873	0.273551	1.10137e-18	0	0	0.00275345	0.0284906	0.00792364	0.0178296	0.00348345	0.00229569	0.00227346	0.00733872	0.0178652	0.000148249	0.00704793	1.15372e-18	0.0198118	0.0111566	0	6.04979e-18	0.0280231	0.00433497	0.00753477	0	0.000126308	3.62102e-19	9.34799e-18
TCGA-30-1718	0.183925	0.00366215	0.196199	3.01772e-19	0.0432174	0.0197373	0	7.95365e-18	0	5.79152e-21	0.00908374	0.00551642	0.00664767	8.578e-18	0.0180642	0.036173	2.99823e-18	0.0713436	0	0.000405404	0.00986661	2.29186e-18	0.3535	1.52967e-20	0.0226353	0	0.000411305	0.0985904	0	0.0294287	0.00251205	0.0436732	0.0372329	0.0138904	0.00265964	0.000212278	0.0031207	7.89732e-18	0.0235062	0	2.50155e-18	0	0.167028	0	0.00264179	1.61045e-19	0.00024147	0	0
TCGA-24-0979	0.0677459	0	0.0871803	0.0177641	0.0794262	0.000332106	2.88133e-18	3.7238e-18	0.00400459	0	1.46246e-21	5.89259e-19	0	0	0.000185741	0.00630773	0.00797431	0.0396266	7.22613e-19	1.2686e-19	0.0192005	0.00238801	0.335542	6.89623e-19	0.022088	2.20214e-19	0.00253093	0.00447434	6.24291e-18	0.0502701	0.0095125	0.00470013	0.0110388	0.00162948	0.0129002	0.00221116	0.00409484	0	0.0279104	0.0213033	0	0	0.010707	0.00690829	0.00845506	3.42123e-19	0.000722282	0	2.32997e-18
TCGA-25-1326	0.278731	0	0.192927	0.0465844	0.00646637	0.00399628	1.62272e-18	0	0.0123396	0	0	0.015967	0.00425446	0	0.0101638	0.0347062	0.00978001	0.0144809	0.00176156	0.00424313	0.014058	0.000518328	0.260871	0	0.0679028	2.17502e-18	0.000660837	0.0357724	0	0.0147259	0.00155467	0.111127	0.0676493	0.0471782	0.0130306	0	0.0011905	1.01541e-18	0.0164827	0.0203284	0.0224656	0	0.178949	0.00697392	0.00899594	1.60156e-19	3.46707e-21	2.24652e-20	4.91026e-18
TCGA-24-1416	0.102753	0.00202435	0.0747839	0.00627779	0.16832	0	0	1.19307e-17	0.00609822	2.97911e-18	2.08346e-19	5.84151e-19	4.17411e-18	0	0.00810596	0.011483	0.0303366	0.029939	8.98476e-19	0.00339622	0.00519381	0	0.400993	7.83448e-20	1.3552e-18	5.75955e-19	0.000123208	0.0140928	0.0721569	0.0539622	0.00238894	0.0241981	0.0169553	0.0131949	0.00898879	3.58213e-20	0.00481025	0	0.0423322	0.00671154	7.19836e-18	7.44088e-18	0.0138687	0.00424645	0.00753279	0	0.000609696	0	1.07066e-17
TCGA-29-1781	0.3389	0	0.0701619	0.149444	0.0167546	0.0240521	0	3.453e-19	1.09673e-18	0.0663325	0.00642974	0.0319148	0.078661	2.52064e-21	0.0316145	0.00408964	0.00142809	0.124256	0	0.0120551	0.0112185	0	0.153788	0	4.23407e-19	0	0.000910387	0.0194048	0	0.010251	0	0.149533	0.0808185	0.054029	0.0160608	0.000579739	0.0033834	0.0234276	0.0337384	0.0187708	0.0321353	0	0.0530768	0.00952032	1.02601e-18	0	0.0015256	0	0
TCGA-09-1666	0.22063	2.06069e-19	0.0366475	0.0268407	0.0127878	0.016275	0.0049085	0	0.00237258	0.0154447	0.00409765	0.017196	0.0369108	0	0.0342373	0.0173593	0	0.059925	0	0.00886992	1.27861e-19	3.21243e-20	0.242414	4.31455e-19	3.14775e-18	0	4.70373e-19	0.0543724	0.0120655	0.0299338	0	0.0616708	0.0468228	0.0140721	0.0131738	0.00365281	0.00235784	5.81731e-18	0.0313374	0	0.00479523	0	2.74262e-20	0	0	0	0.00181386	0	0
TCGA-25-1877	0.146782	0	0.179923	0	0.0325772	0.0212937	0	2.27908e-19	0	0	0.0538709	0	7.99336e-18	3.24297e-18	0	0.0094543	0	0.108189	3.88003e-18	0.00626124	0.00976957	4.48583e-18	0.1009	3.09233e-19	0.00146426	3.47435e-18	0.00184376	0.081786	0.0874803	0.00661759	0.00189607	0.0351931	0.02581	0	0	4.51634e-21	0	5.61802e-18	0.0964427	0	6.24794e-18	0	0	0.0032221	0.176912	0	0.0272797	1.10771e-18	6.92742e-18
TCGA-36-1570	0.138372	0	0.0172689	0.0118169	0.0941933	0.00980192	4.39825e-18	2.6939e-18	0.0124658	0	0.00371509	0.0102356	0.00553768	0	0.00183034	0.0108276	0.0016744	0.0496385	5.00679e-19	0.00113539	0.00503021	4.89902e-18	0.32692	8.648e-19	0	1.09725e-18	0.00184721	0.01129	0	0.0313051	6.4562e-20	0.0184721	0.0273994	0.00232749	0.014636	0	0.00182411	0	0.0273926	3.64617e-18	2.66229e-18	3.74379e-18	0.0520955	0.0048439	0.00941022	0	0.000295239	1.49193e-20	2.84408e-18
TCGA-61-1995	0.18526	0	0.0638563	0.0488325	0.0202167	0.00518446	0.0145253	0.0038441	0.0451879	0.023892	0	0.0216038	0.0170199	9.16279e-19	0.0679873	0.0132423	0.00917881	0.0290081	0	0.0284416	0	0.00657386	0.364019	0	0.000573663	3.17153e-19	0.000574322	3.30002e-20	0.191251	0.059051	0	0.0740408	0.0449355	0.0348565	0.0163843	0.00245603	4.86462e-20	3.89641e-19	0.00843026	0.00483173	0.0224219	5.65187e-19	0	0	0.0166489	0.00391835	0.000644193	1.27311e-19	0
TCGA-09-0367	0.176812	0	3.68568e-20	0.0175843	0.0598597	0	3.18549e-18	5.70966e-18	0	0.0050857	0.000577278	8.21511e-19	4.81735e-18	0	0.056931	0	0.00655636	0.0957527	7.45975e-20	0.0079887	0	0	0.546897	0	0	0	1.11696e-19	0.0155559	8.48732e-20	0.0975394	0	0.0482832	0.0309681	0.00479268	0.00601233	0	0.000753864	0.00258178	0.0523698	0.0070583	0	0	0.0573292	0.00446693	0	1.58143e-18	0.00064673	9.29592e-19	0
TCGA-24-2267	0.331046	1.23474e-19	0.0586852	0.131279	0.0439781	1.89764e-20	7.37606e-19	5.03753e-20	0.0631918	0.0544283	0	0.0305944	0.0405485	0.00504165	0.0579553	0.0265821	0.0235987	0	0	0.0116409	0.0261458	2.20569e-18	0.338995	0	0.0269855	0	0.00134137	0.00761552	8.89122e-18	0.0313578	0	0.0880673	0.0752348	0.0240737	0.0138181	0.000188849	0	0.012741	0.0194404	0.00730193	0.0322313	0	3.32246e-18	0.0127389	0	0.00563321	0	0	8.62189e-19
TCGA-25-1321	0.0878959	0.000273677	0.0368499	0.0200776	0.0986763	0	1.17327e-18	0	0.020999	0	4.01897e-20	1.99767e-20	0	0	0.0173981	0.0250862	0.0257481	0.000305479	3.36134e-18	0.00118215	0.00767674	0.00121667	0.30523	4.89447e-19	0.0598327	3.6941e-18	0.00177676	0.0159484	0	0.0282881	0.00102108	0.0286716	0.0121492	0.0227546	0.0176063	0.00129206	0.00211712	0	0.0207507	0.0281854	2.02668e-18	0	0.00485106	0.00510708	0.0129037	2.15503e-19	0.000994572	0	3.78008e-20
TCGA-04-1648	0.143228	0	0.0221272	0.0625368	0.00553265	4.47955e-21	0.00170747	0	0.022596	0.0151673	1.86913e-18	4.40376e-19	0.00113272	0	0.00886917	4.52145e-20	0.0626602	0.0187935	0	0.00640053	0.000534443	0.00656048	0.283192	1.52568e-19	0	0	0.00270617	0.0391438	0.0193536	0.0145991	0	0.0378235	0.0127917	0.0191433	0.00404119	4.40384e-20	0.00373589	3.64214e-18	0.0107717	0.0163254	5.17442e-19	0	3.19037e-18	0	0.000128423	7.6557e-19	0.00263666	8.56679e-22	2.76462e-18
TCGA-57-1586	0.14237	0	0.0344209	0.00998694	0.17434	0	0	5.60504e-18	0.0164779	0	0	3.1916e-18	1.13636e-18	0	0.0297811	0.0092538	0.0317337	0.0313887	2.71065e-18	0.00208069	0	9.9895e-20	0.360949	0	3.62437e-18	1.29158e-18	0.00298657	4.7472e-20	1.1785e-17	0.033913	2.17723e-19	0.00892798	0.0126061	0.00801017	0.0109473	0	0.00365567	1.67306e-18	0.010818	0.0368986	0	0	0.0557427	3.9512e-19	0.00993924	3.24676e-18	0.0016437	5.57603e-20	0
TCGA-25-1313	0.230337	1.66501e-19	0.0808958	0.0113755	0.136117	0.00131296	0	0	0.0141108	0	5.84167e-20	0.00232544	0	0	0.0198404	0.0470773	0.00147766	0.0264322	0	0.00101633	0.00277174	9.96415e-19	0.278861	0	0.0644583	0	0.00289104	0.0540492	0	0.0158793	0.000144213	0.0936824	0.0797834	0.0366653	0.0186375	6.2148e-20	0.0167404	0	0	0.0099996	0.0234465	0	0.0390664	0.00136937	0.00275307	6.23804e-19	0.00133592	0	0
TCGA-29-1701	0.221359	0.0209034	0.140429	0.00534377	0.0271384	0.0256759	9.10984e-19	3.43969e-19	1.3093e-18	0	0.027581	0.00114142	0.0224963	6.48907e-18	0.0362581	0	0	0.22007	1.24217e-17	0.00412673	4.47452e-21	2.53629e-18	0.329845	0	0.0183161	0	0	0.0452073	0.0106863	0.0272227	0	0.107561	0.0558678	0.0446556	1.00411e-18	0.000196445	0.00490004	0	0.0259341	0.004815	0.00691249	0	0.0599046	0	0.00932275	0	0.00150597	1.79348e-18	0
TCGA-29-2425	0.11383	0.000588459	0.066566	0.0183622	0.116986	0.00686817	0	0	0.0345168	0.000192903	0.00728645	0.0043327	0.0118716	0	0.0204314	0.00146795	1.85599e-18	0.0167502	0	0.00405963	0.00591267	8.83433e-19	0.276986	0	0.0169116	3.30199e-19	0.00103284	0.0153153	0.0144751	0.0231219	0.000792055	0.0132544	0.00836034	0.00866128	0.0115738	0.000521624	0.00148508	2.10729e-18	0.054686	0.0166008	0	0	0.093786	0.00332924	0.0124354	3.10805e-19	0.00209998	1.50467e-18	3.40935e-18
TCGA-20-1682	0.154027	0.0434199	0.246958	0	0.0203405	0.000299165	0	7.20484e-19	0	0.00217372	0.000489671	5.07945e-19	0.00908041	0	0.0359654	0.0273991	0	0.0604419	1.03834e-19	0.0121942	0.0194689	0	0.330346	4.46197e-19	0.0516792	3.24029e-18	0.000746221	0.1288	0.140744	0.0354179	0.00660495	0.0495137	0.030173	0.0491104	0	0.000943289	0.00331926	1.39901e-19	0.0202364	0.0337789	1.13431e-19	2.89504e-19	0.0906611	0.00586907	2.46024e-18	0	0.00174654	2.14694e-19	0
TCGA-24-1550	0.184573	0	0.395618	1.32828e-19	0	3.8008e-20	0	0	0	3.66911e-18	0	0	3.35545e-20	0	0.107238	0.0676364	6.82826e-18	0.017075	3.28798e-20	0.0422711	0.0742914	0	0.203262	3.33719e-19	0.175183	7.26287e-18	0	0.187226	0.435465	0.0417512	0.00612202	0.0713017	0.0797556	0.000731317	1.01398e-19	0.00173	1.18857e-19	8.45017e-18	0.0228513	2.97539e-18	0.0274008	0	1.26411e-18	0.0310252	0.00801029	0	0.00259669	0	0
TCGA-24-1546	0.181782	1.77962e-19	0.246273	0	4.98834e-19	1.23546e-19	1.75308e-18	3.51577e-18	0.0242446	0.0230446	1.59281e-18	0.000863199	2.37988e-18	1.23065e-18	0.0848677	0.0985533	0.0498399	0.0199213	0	0.00668887	0.0111255	0.00538232	0.347309	1.12704e-19	0.0911209	0	4.22461e-22	0.106293	0.0167862	0.0381134	0.00285615	0.0659767	0.0419925	0.0331072	0.00102949	0.000391046	0.00485283	8.02388e-18	0.0172176	0	0.00607837	0	0.290474	0.000591915	9.83824e-19	5.47078e-18	0.00297319	0	0
TCGA-61-2113	0.258689	8.83686e-19	0.215097	0.0162949	2.18064e-18	0.00120006	0	0	0.0300053	0.0103251	0	0.00234849	0	1.59018e-19	0.0382081	0.0266776	0.0265361	0.0327253	0	0.00923211	0.00563056	0.00448245	0.392621	0	0.0110888	1.15482e-19	2.08245e-20	0.00572232	0.0378442	0.0440329	1.15552e-05	0.0575223	0.0514556	0.0125263	0.00769167	3.7768e-20	0.00976627	7.08266e-20	0.00863944	0.0197644	0.0201127	1.27987e-18	0.036818	0.00615313	0.00132053	0	0.000151823	1.47176e-18	1.70751e-18
TCGA-13-0726	0.142139	7.96945e-20	0.0877204	1.12366e-18	0.0625437	2.68136e-19	0	0	0.0129167	0.0112328	0.000965099	4.2917e-20	1.46295e-18	1.66902e-18	0.00826615	0	0	0.052746	0	5.73506e-20	0	0	0.52941	2.30965e-18	0.0435744	0	0.000402533	0.0335449	0	0.0835553	0.000776734	0.0297304	0.0274179	0.0118018	0.00393543	0	0.00640572	0	0.0068421	0.00895342	3.56731e-18	0	0.186124	0.000175291	1.09722e-18	1.14974e-19	0.00137555	1.81743e-18	0
TCGA-09-1673	0.0904763	0.000329898	0.015154	0.0748133	0.0877516	0	7.52875e-18	2.31157e-19	0.0251496	2.85876e-18	0.00329105	0.0311954	0	5.86607e-18	0.0247682	0.0307254	1.117e-19	0.037958	0	0.00351561	0.0460459	9.06112e-20	0.0160075	0	0.0375595	5.90196e-18	0.00262168	0.0235711	0.0385237	0	0.00725425	0.0192384	0.00374652	0.0360592	0.0323478	0.00119446	0.00294883	0	0.011725	5.4499e-19	1.65099e-18	0	0	0.0142521	0.0230391	0.00642482	0.00457154	0	0
TCGA-13-0720	0.0161384	0.0024332	0.0545324	1.86434e-22	0.0506314	1.22357e-21	0	0	0.0333692	0.0161216	0	4.14691e-19	0	0	0.00200094	7.97301e-19	0.000547206	0.0347731	0	6.04856e-20	3.45627e-20	0.00150791	0.387868	1.50889e-19	0	0	7.09559e-20	0	0.00349333	0.0479705	0	0.00852254	0.00552605	1.80897e-19	0.00487907	0	0.00391055	0	0.0151544	0	0	0	0.0184504	0	0.00272238	9.83894e-19	0.00138894	1.59446e-19	1.79008e-17
TCGA-61-1728	0.109829	0.00199543	0.0967212	0.00753116	0.0478972	0.000463828	4.72511e-18	3.26005e-18	0.00337169	0.00413619	0	0	8.37004e-20	0	0.0108781	0.00739609	0.00833276	0.032325	0	0.000748917	0.00618757	0.000912388	0.369338	0	0.0138329	0	0.000605509	0.0174605	0.00211808	0.0351091	0.00704122	0.0292828	0.0159845	0.0144543	0.00124928	0.000338623	0	1.4414e-18	0.0426623	0.0504422	0	0	0	0.0080012	0.00381155	0	0.00447184	0	2.51859e-18
TCGA-09-2053	0.217679	1.55036e-20	0.116457	0.0794016	1.38837e-18	1.23453e-22	0	0	0.0126231	4.70307e-19	0.0113668	0.0131353	0	1.19387e-18	0.0312866	0.0996525	0	0.0393976	0	0.00838032	0.0069825	0.00335341	0.309205	1.22552e-19	0.0634103	0	0.000606533	0.0366456	0.0312051	0.0385236	0.00336279	0.0350423	0.042235	0.00495154	0.0066787	0.000421423	1.50853e-18	0.0186412	0.0352915	0.0455863	0	0	0	0	0.00393865	0	0.00410554	0	5.99993e-18
TCGA-29-1707	0.159824	9.32636e-22	0.0282345	0.0267108	0.088225	0	4.70574e-18	3.54239e-19	0.0514942	0.0692798	8.37778e-20	0.0164155	0.00842259	2.56398e-18	0.0513072	4.40146e-19	0	0.0768801	0	0.0118476	6.56156e-21	0	0.303491	1.08123e-18	0.018868	1.01614e-19	0.00127224	0	0.0637041	0.0223107	0.00264697	0.0432348	0.0308544	0.0235048	0.00500792	0	0.0085109	3.41605e-18	0.00225701	0	0.0228969	0	0	0	0.00383129	0.00121159	0.00035818	0	0
TCGA-25-2391	0.141095	0	0.0227377	0.016626	0.00068847	0.00417536	2.9903e-19	0	0	0.0123034	0.000733559	0.00582684	0.0162078	1.33307e-18	0.0241329	4.40685e-19	6.07805e-20	0.03528	0	0.00625914	7.22894e-19	0.00100935	0.388429	0	0.00446899	0	0	0.0078817	0.0383312	0.052101	9.02114e-20	0.055892	0.0410402	0.0198547	0.00715799	0.000868611	0.00138568	2.27784e-19	0.0246561	0.00106711	0.00958898	1.13176e-18	0	0	2.16576e-19	0.000144481	0.000529744	5.42101e-20	5.07815e-19
TCGA-25-1626	0.248046	0.0840512	0.427454	0.0156315	9.72715e-18	1.97489e-19	0.00116403	6.10888e-18	0.0123755	0.0203846	3.2224e-19	0.0501095	0.0274925	0.00718174	0.0784672	0.124739	0.0104026	0	3.98215e-19	0.014045	0.023702	0.00856904	0.275697	8.04207e-20	0.221909	5.86772e-19	0	0.10789	0.0846341	0.0246621	0.00535686	0.0803968	0.068266	0.0364841	0.00212609	0.00331701	0.0126518	2.21551e-18	1.03126e-18	0.0642066	0.0359037	3.61961e-18	0.130635	0.00474067	0.00386027	0	0.00139999	0	9.41593e-18
TCGA-24-1845	0.193608	7.14878e-19	0	0.0309754	0.0580031	0.000210779	0	2.82535e-19	0.0251371	0.0341777	6.0224e-20	0.00347727	0.00657323	3.29375e-18	0.0223508	2.08912e-19	3.28912e-18	0.0535618	9.47427e-19	0.00397019	0.0017594	0	0.282743	0	0	0	0.000503881	0.0218791	5.39618e-18	0.0232006	0	0.0487683	0.0460439	0.0148835	0.00689688	0	3.95294e-19	2.24117e-06	0.0586859	7.44797e-19	0.00419645	0	0	0.0018002	0.000696353	5.60619e-19	0.000263677	0	3.34002e-18
TCGA-61-2000	0.177945	0	0.130342	0.0160791	0.0578879	0.0122625	0.00904627	2.4309e-18	0.00606274	4.2806e-21	0	8.92359e-19	0.000112267	0	0.00275165	0	0.0183753	0.0574394	2.16685e-18	0.0023311	0.0109184	2.13653e-18	0.221243	0	0.0291901	0	0.00120331	0.0326707	3.20422e-18	0.018449	0.00318915	0.042328	0.0210252	0.0167721	0.00323619	1.88369e-19	0.00377005	0	0.0510664	0.0480126	7.91366e-19	0	0.0501062	0.00244807	0.00106906	0	0.00143873	0	6.1691e-18
TCGA-30-1866	0.155475	0.000647001	0.0545049	0.013231	0.0447548	0.0128141	2.55077e-18	3.29685e-19	3.77887e-18	1.62278e-19	0.0460809	0.0354456	0.0362881	0	0.0136593	0	0	0.120789	2.06697e-18	9.54282e-20	1.53208e-21	8.07909e-19	0.31234	2.23076e-18	0.0169965	0	0	0.003707	0	0.0411467	0.000679205	0.0459248	0.0235378	0.0176467	0.00248974	0.001872	0	0.000185569	0.0330928	0.0104852	8.21726e-20	5.7515e-18	0	0	0.00152129	0	0.00436041	1.1425e-19	4.49437e-19
TCGA-31-1951	0.269581	0	0.264998	0.0345461	0.0263621	1.06228e-19	0.00227225	5.97041e-19	0.0270597	2.86346e-19	1.88264e-19	0.00804115	0.00972214	6.94737e-19	0.0313221	0.0288846	0	0.0165849	6.5306e-20	0.00810729	0.00451494	0.000929531	0.370432	2.35899e-19	0.0562758	6.16606e-18	0.000580186	0.0164549	2.90609e-18	0.0247482	0	0.0620282	0.0517876	0.0187235	0.00761974	0	0.00651281	0	0.00383853	0.0110287	0.0131803	3.04499e-18	0.0219504	0.00012311	3.84877e-19	0.000956392	0.000945575	0	0
TCGA-29-1761	0.180538	6.42725e-19	0	0.0005136	0.0223826	0.0287847	0	2.91708e-18	7.49733e-18	0.0127729	0.0169732	0.00589249	0.0200506	0	0.00519706	9.55266e-19	0.000381695	0.194872	3.39379e-18	0	0	0	0.25772	0	0	0	2.15589e-18	0.0675982	3.12367e-18	0.0185799	5.01939e-19	0.0948361	0.0295821	0.0539749	0	0.00127851	0.00308853	5.50877e-18	0.0521714	0	0	7.16449e-18	0.0696524	0	0.00240623	8.29679e-20	0.00162019	0	0
TCGA-04-1530	0.254245	6.74895e-20	0.300993	0.0169463	0.0304131	0.00138289	0	0	0.0344808	0.00548135	4.3648e-20	0.000616986	3.77549e-19	4.40495e-18	0.0213973	0.0399907	0.00477382	0.0427027	4.671e-19	0.00608069	0	0.00196777	0.324262	0	0.0312942	0	0	0.018286	0.0212876	0.0276789	0	0.0527311	0.0395249	0.0138349	9.75772e-06	1.43922e-20	0.000290262	7.22644e-20	0.00714124	0.0254477	0.00606343	0	0.0998296	0.00281445	0.00322571	4.9573e-19	0.0012073	2.07625e-19	1.63736e-20
TCGA-04-1350	1.87443e-20	3.01328e-19	0.0407267	0.0109583	0.0229126	0.00692093	0	0	0.0131346	0	0.0299752	0.0247594	0.0187601	5.76691e-19	0	0.00496447	0	0.0517649	0	0	0.000264019	0.00114936	0.202261	0	0	8.28933e-19	0	0.0154813	0.0159044	0.0231938	0.00234361	0.00874459	0.000562307	0.00561845	0.0139505	0.00235516	0	0	0.0413304	0.0236358	2.26543e-18	2.3788e-18	0.0477221	1.82624e-19	0.0361607	0	0.00753863	0	7.68092e-18
TCGA-24-1464	0.179975	0	0.00229572	0.0114862	0.0612375	0.00858775	1.09775e-18	0	5.38711e-19	0	0.0189448	0.0323619	0.0226673	3.88109e-18	0.00412234	0.00857985	0.00386525	0.125796	0	0.000805143	0.000999742	4.44096e-19	0.303711	0	0.0209384	0	0	0.0274123	0	0.030484	0.00027882	0.034502	0.0317973	0.0173019	0.00784637	0.000382527	0.0020331	0	0.0398699	0.00432656	0	7.2976e-18	0.127187	0	0.00535474	0	0.000739168	0	0
TCGA-24-2293	0.222579	0.03982	0.383107	0.0146613	0.013661	0	0.000439304	1.57122e-18	0.0332512	0.0280127	5.62164e-20	0.0105476	0.0051641	3.41237e-19	0.089207	0.0677527	0.0166409	0.00795515	0	0.0168689	0.0484642	0.00786341	0.312096	0	0.206039	5.3975e-19	0.00171851	0.111696	0.112348	0.0288345	0.0198221	0.065265	0.0702777	0.0168816	0.00823647	0.00286878	0.0106892	0	0	0.0200061	0.0566153	0	0.0493851	0.0284408	1.46606e-19	0.000848569	5.60594e-05	0	3.52829e-18
TCGA-09-1670	0.177404	1.40059e-18	0.00565917	0.0411592	0.0473863	0.00531178	2.96627e-18	0	0.0199661	0.0220954	0.00532928	0.0146334	0.00096314	9.21236e-20	0.038604	0.0226361	0.0100253	0.0536332	0	0.00370497	0.00215594	1.78605e-21	0.292976	2.65322e-19	0	0	0.00113685	0.0192781	3.82859e-18	0.0310705	0.00155089	0.0460089	0.0313189	0.0168407	0.0236603	0.000648501	0.00711141	5.60451e-19	0.028698	0.0197626	0.0109021	0	0	5.6975e-19	0.013546	0	0.00123924	0	1.26723e-17
TCGA-24-1842	0.221743	0.000887336	0.111777	0.0426701	0.0769991	0.00805178	0	0	0.00565263	0.0626396	0	0.0250071	0.033942	0	0.0582312	0.0203346	0.0134929	0.0284308	0	0.0120237	0.00594202	2.08639e-19	0.331406	0	0.039053	4.01722e-19	0.00123443	1.18532e-19	0.0367775	0.0254871	0	0.0739283	0.0447233	0.0243631	0.0103874	7.58402e-19	0.00125069	1.01198e-18	0.0511786	0.00786416	0.00416732	5.11128e-18	0.0064902	0.00683566	6.77774e-19	3.54105e-19	0	0	2.30634e-17
TCGA-23-1024	0.0307423	1.07903e-18	0	0.0238747	0.0388555	1.60437e-21	0	1.15518e-18	0	0.0237219	5.52312e-19	3.39271e-19	1.5306e-18	3.41188e-19	4.83767e-19	1.29717e-17	3.41237e-18	0.058391	1.76383e-19	0	0	0	0.269274	0	0	2.55028e-18	0.000498279	0.00445764	1.29682e-18	0.0170624	5.29235e-19	0.00947902	0.00637654	0.00233063	0.00955676	0	0.0110756	0.000347366	0.0686434	0.00337732	0	0	0.132222	0.00947763	0.0114456	0.00212121	0.00110531	0	1.65083e-17
TCGA-09-0364	5.93905e-18	0	0.0488433	0.0132771	0.0609622	2.78099e-20	0	0	0.000153466	0	0.0111601	0.019282	0	0	0.0150607	0	7.13047e-19	3.21318e-19	0.0115784	0	0.0131178	1.94571e-19	0.133841	0	0.0461025	1.72529e-18	0.000623419	0.00147559	0.0696694	0.00626934	0.00881772	7.60841e-19	0	0	0.0103367	0.000656607	0.000543466	4.89958e-19	0.0671652	0.0312384	7.89103e-19	3.02494e-19	0.198416	0.0114832	0.0190622	0.00324659	0.00825194	0	0
TCGA-24-1603	0.0676578	0	0.0625748	0.0396544	0.000389568	0.0105614	0	0	0.00667276	0.00199948	0.00445052	0.00797102	0.0294272	0	0.00912997	0.018237	5.48224e-19	0.0596876	1.47566e-18	0.00301661	0.0193717	0.00104416	0.236797	0	5.93108e-19	0	0.00128083	0.0395142	0.0394796	0.0280697	0.00443826	0.0276683	0.0100852	0.0173443	0.0139344	0.00284478	0.00136557	0	0.0269885	0	0.00149214	1.01784e-18	0	0.00838157	0.0133834	3.2748e-20	0.00168333	0.000367942	0
TCGA-29-1696	0.0883103	7.81001e-20	0	0.0070901	0.0736096	0.0244583	4.7288e-18	5.805e-18	5.91792e-19	0.0187051	0.0105297	0.00171182	0.0229568	1.16874e-18	0.0092396	0	0.0418959	0.130636	0	0	0.00323318	6.50916e-19	0.343946	2.76242e-18	9.55091e-18	3.29734e-18	5.37654e-18	0.040416	1.85394e-18	0.0288723	0.00258493	0.0206037	0.00198296	0.0178057	0.00562173	2.86982e-21	0.00485468	1.29158e-17	0.0300374	7.08671e-18	2.68635e-18	3.69904e-18	0	0	0	0	0.00292452	2.74205e-18	1.29771e-18
TCGA-61-1911	0.277121	2.50795e-19	0.0180594	0.0717121	0.04332	0.00573247	2.79038e-18	7.57255e-19	0	0.0696209	0.0140513	0.0493669	0.0853304	0	0.0217749	0.0244946	0.0140201	0.0874506	2.04626e-18	0.00812785	3.64345e-19	0	0.435504	2.91397e-19	0	0	0.000860103	0.0133172	0	0.0602163	5.39213e-19	0.0722291	0.0324568	0.0472683	0.00958333	0	0.000303246	0.00294732	0.0099801	0.0140469	0.0119908	0	2.41127e-18	0	0.00648892	1.44557e-18	0.000782767	0	0.012636
TCGA-61-2097	0.178177	0	0.0991633	0.00844441	0.0756077	0	0	1.40875e-18	0.0195083	0.0146476	4.31511e-19	6.08727e-20	3.699e-18	1.3425e-18	0.0293406	3.13038e-19	0.00658845	0.00446804	0	0.00300521	0.0180321	0.00632414	0.366138	1.86465e-19	0.113989	6.13345e-18	0.0023492	0.0147519	0.00608209	0.0291556	0.00715561	0.036649	0.0406822	0.0104006	0.00793761	0.0015184	0.015392	2.87635e-18	0	0.0497563	0.0184058	0	0.181846	0.00176199	0	9.15768e-05	0.000523146	0	0
TCGA-24-1544	0.0121342	0.00285797	0.0451119	0.00166519	6.75302e-20	0	2.96263e-18	0	0	0	1.48318e-20	0.0434158	0	0	0.000138502	0.0484107	0	0.0324171	5.09092e-19	1.25609e-18	0	0.00358439	0.320615	1.71295e-19	0.00150113	1.58495e-17	0	0.0672169	0.00779453	0.0317555	0	0.00371444	0	0.00266013	0.00567315	0.00249559	0.00902299	1.38125e-18	0.0495877	0.0213603	0	1.88479e-17	0.0831452	0	0.0130169	4.59363e-19	0.00635438	3.69177e-20	2.30304e-17
TCGA-61-2098	1.17002e-18	7.22333e-19	0.139512	0.0132421	0.0530835	0	0	0	0.0463456	9.35357e-18	1.54058e-19	0	1.93022e-18	0	0.00535902	5.59408e-20	0	0	0.00270641	0	0.00691122	0.00737389	0.281991	0	0.0265995	0	0.00123927	0.0207861	0.0527137	0.0275094	0.00164388	1.19045e-18	2.31752e-19	0	0.0125613	0.00193406	0.00231651	8.53739e-19	0.00978485	0.06877	0	0	0.132355	0.000911868	0.0287632	0.00507935	0.010652	1.11306e-18	0
TCGA-30-1714	0.0319344	0.0013733	0	0.00341223	0.00749816	0.0190295	1.44456e-18	0.00271066	0	7.52859e-19	0.0301659	0.000534402	0.0108005	2.26871e-18	0.00446901	1.41544e-19	0	0.12616	3.3458e-18	4.08301e-20	0	1.10074e-18	0.367202	1.16417e-18	0.0131073	2.22386e-18	0	0.0392603	0.0161451	0.0458394	0	0.0170774	0.00380596	0.00731935	0.00709753	0.000590128	1.04894e-20	0	0.0329207	0.0207039	2.74449e-18	2.63334e-18	0.0204709	1.40437e-18	0.0115534	3.31489e-19	0.00334417	8.26019e-19	0.000867394
TCGA-29-1776	0.131455	0.020632	0.14901	1.53896e-19	0.0298338	0.00413453	0	2.61418e-19	0	0.00785518	0	0.014863	0.0181493	2.50855e-18	0.0137306	0.0771096	0.0076062	0.034043	2.3421e-19	0.00225109	0	0	0.345059	0	0.103955	0	0.00122843	0.0924842	0.00180973	0.0413173	0.00336638	0.0203531	0.018612	0.00820383	0.00554023	0.000868184	0.00461615	0	0.0449267	0.00243523	0	4.0067e-18	0.0462038	0.000338042	0.00347675	1.90529e-18	0.00165667	0	0
TCGA-24-1558	0.059624	0	0.0974163	2.03453e-19	0.0424222	2.89806e-20	0	6.64894e-18	0.0165496	0	3.50722e-20	0.00625728	0	0	0.00111175	0	1.09419e-18	0.025694	0	0	0.00899608	0	0.361814	3.61028e-20	0.0285476	0	0	0.0660932	7.86433e-20	0.0461662	0.000659714	0.0142939	0.0211937	0.0137687	0.000931733	0.0018097	0.00125955	3.97837e-18	0.018742	0.0314923	2.33588e-18	0	0.0775374	0.00750491	0.0184124	7.5882e-20	0.000138633	0	0
TCGA-61-1900	0.0475995	0	0.146116	7.71947e-19	0.0936982	4.2279e-20	0	0	3.58003e-05	0	0.0118416	4.99396e-18	0.00224115	0	2.22427e-21	0.0120797	0.00971527	0.00768895	6.58596e-19	3.59369e-20	0.00850435	0	0.288717	0	0.00386044	0	0.00262582	0.050327	0	0.0347373	0.00327079	6.65654e-19	0.00335506	0.00108146	0.00192044	0.000101919	0.000676675	0	0.0425168	0.0399325	8.23304e-18	0	0.0964931	0.00354647	0.00244576	3.16064e-18	0.00567812	6.31631e-20	0
TCGA-10-0933	0	0	0.151689	0	5.0229e-18	0	0	0	0	0	0.0122698	0.00600488	0	0	0.0211044	0	0	0.0598162	0	0	0.00737131	1.45838e-18	0.273422	0	0.05592	0	0	0.0900659	0.057207	0.0417158	0.00261175	0	0.00251251	7.27557e-19	7.96605e-19	0	0.002452	7.75096e-19	0.0680774	5.90262e-05	1.64195e-19	6.13483e-19	0.0905284	0	0.00517831	0	0.0138653	1.24016e-18	4.84326e-18
TCGA-04-1356	0.0405022	0.00326116	0.108372	0	0.0463449	0	5.41226e-18	0	0.0377853	0	0.0156614	0	0.00881088	0	0.0089696	0.00570726	0.00522435	0.0627048	0	0	0.000363129	0	0.331766	0	0	1.18086e-18	0	0.0300189	1.59554e-19	0.0260918	2.62637e-21	0.017798	0.0131545	0.00406316	0.00430384	0.0002084	0.00255842	0	0.0171972	0	6.96417e-20	0	0.16694	0.000732084	0	0	0.00158964	6.80835e-19	0
TCGA-04-1362	0.119652	0	0.0530303	0.00573288	0.0298236	1.56741e-19	0	0	0.0232268	9.19606e-19	0.00131437	0	0.0079516	1.57531e-18	0.0130622	0	0.00357938	0.0265218	4.34833e-19	0.000324016	0.00668714	0.0061033	0.350237	0	2.74275e-18	0	0.000165532	0	6.93689e-19	0.0363396	0.00368208	0.0259796	0.0218915	0.00574152	0.00213359	0.00172344	0.00246595	0	0.0152505	0.0251645	2.69329e-20	2.93961e-20	0.0114991	0.000454403	0.00919047	1.39748e-19	0.000437165	0	2.14198e-18
TCGA-29-1688	0.246261	0.00683218	0.116726	0.0182241	0.10187	0.00403691	0	0	0.00235101	0.0169012	0.00362797	0.00494129	0.0150902	0	0.0563897	0.0715427	1.06868e-18	0.106763	9.38319e-19	0.00311898	0.00230925	0	0.278406	1.03648e-18	0.079941	0	0.00158416	0.0997037	0	0.0151709	2.29328e-22	0.0892299	0.0705476	0.0237203	0.0147608	0	0.0082953	4.59245e-18	0.0422213	1.89351e-19	0.00794543	7.1539e-18	0.00459769	0.000864893	0	1.24925e-19	0.0005432	1.24171e-18	0
TCGA-10-0931	0.139681	3.7893e-19	0	0.00437337	0.0546659	2.79117e-22	0	6.43114e-19	4.3115e-19	0	0.00781244	4.18025e-18	4.79908e-18	3.44079e-19	1.87395e-19	2.90707e-19	0.00102365	0.105091	5.94147e-18	0	1.17278e-18	0	0.342525	1.75232e-18	1.16617e-18	0	0	0.00568175	3.60622e-19	0.0356035	0.00145979	0.0230333	0.026785	0.00748179	0.000641164	0	0.00751082	2.61103e-18	0.0671843	8.57199e-18	9.96908e-19	3.90379e-18	0.130343	0.00050013	0.00976995	1.58056e-18	0.00124042	1.9333e-19	6.09585e-18
TCGA-25-2042	0.180987	0.0328136	0.467589	1.4468e-19	0.0189218	0	0	0	0.0198034	0	2.15383e-20	0.01759	4.20997e-20	4.69351e-18	0.0629802	0.156759	0.00473292	0.00503502	1.72151e-19	0.0105881	0.0655688	0.0126883	0.342015	0	0.287345	0	0.00217718	0.155182	0.124999	0.0363659	0.0309133	0.0396161	0.048336	0.00764895	0	0.00630464	0.00520119	0	1.18434e-18	0.033697	0.0206486	3.50756e-19	0.135049	0.026984	0.0102299	0	0.00189225	0.000185938	0
TCGA-36-1571	0.0143871	0.00113439	0.0185454	0.00161772	0.0474546	0.00202174	1.74714e-20	0	0.00843834	3.70422e-18	0	0.0204434	0.00483108	0	0	0.0240776	0.0130302	0.030627	0	4.73929e-20	0.00359772	0.00483494	0.249987	5.69891e-19	0.0751293	6.32277e-19	0.000790896	0.0182503	0.00792597	0.029286	0.000816994	0.00870254	0.00116409	0.0127436	0.0144029	0.000895891	0.00403054	3.03028e-18	0.0387307	0.0187247	0	0	0.0554528	0	0.0217463	0	0.00197274	0	5.37971e-18
TCGA-61-1721	0.0867085	0.00692472	0.129871	0	0	1.86171e-18	0	7.96644e-18	0	0	0	0	7.31702e-19	0	0.105575	0.0899217	0	0.0449779	0.0279817	0.0183585	0.30785	3.79201e-18	0.00695066	0	0.44708	3.37757e-20	1.53207e-18	0.938985	0.403613	2.85242e-21	0.186302	0.0374516	0.0191277	0.0544709	6.31013e-19	0.014438	0.00582967	1.89914e-17	0.0122722	0	0	4.0661e-19	0.244931	0.135919	5.30671e-19	5.29845e-18	0.00342413	0	0
TCGA-04-1536	0.0939761	0	0.099204	0.000562846	0.0860949	5.28494e-21	0	2.15365e-18	9.45106e-19	0.0045832	0.00419965	0	0	0	0.0172251	0.0281865	6.57586e-20	0.051419	7.18584e-18	6.451e-20	5.69614e-18	0	0.414515	3.70293e-18	0.0167675	0	0.00261511	0.0406003	0	0.0694802	3.57928e-19	0.048537	0.0321898	0.0129797	0.00472418	0	7.51487e-20	4.4776e-18	0.0536291	0.00157697	0	0	0	1.46151e-18	0.0127716	0	0.000243065	0	5.67948e-19
TCGA-61-1737	0.218489	0.00416131	0.245961	2.89429e-18	0	0.000937383	2.1147e-18	0	0	0	0	1.07361e-17	1.57436e-19	4.09228e-20	0.0479139	0.0110053	3.11556e-18	0.069543	4.46315e-18	0.00252405	0.0134812	1.24753e-19	0.312929	0	0.00192526	4.98739e-19	0	0.150445	0.00105332	0.0338589	0.000432844	0.0664845	0.0573431	0.00203204	0	0.000757353	0.0011484	1.61585e-18	0.0248214	1.8086e-18	5.92747e-19	1.48447e-19	0.293376	0.00291961	0	1.93797e-18	6.4352e-05	8.4941e-20	0
TCGA-61-1725	0.18691	0.00214655	0.10842	0.000291094	0.0100597	0.0185521	1.02418e-18	1.23851e-19	1.60896e-17	0.0110169	0.0121114	0.00351133	0.00725359	1.90852e-18	0.0032164	0.0113856	0	0.168879	1.55392e-19	2.52493e-21	0.00440462	6.40416e-18	0.333455	0	0.0418058	0	0	0.0525383	5.7491e-19	0.0280963	0.00544197	0.0665483	0.0410028	0.022526	0.000107719	0	0.00307491	0	0.0667923	1.5997e-18	0.00596276	4.54619e-18	0.167956	0	0.00543495	6.55413e-19	0.000600416	0	0
TCGA-24-2020	0.0212102	0	0.0561263	0	0.0136964	0	0	9.96079e-19	0.0188665	0	0	1.18799e-20	1.24325e-17	0	0.00184607	0	1.65055e-18	0.0387397	8.23293e-19	0	0.00988961	0	0.232123	3.16061e-19	0	0	0.00490474	0.184613	0.020497	0.0153575	0.00807919	0.00144241	0.0101895	0	0.000944474	0.0016238	0	2.26814e-18	0.0391372	0	9.18676e-18	1.57008e-17	0.164526	0.000123098	0.00553142	0	0.00723383	3.20638e-18	0
TCGA-20-1686	0.0525068	0.0029789	0	4.69445e-18	0.0479445	0.000687886	0	1.55761e-17	0	0	0.00493691	0	7.57179e-18	2.39835e-17	0.0115236	1.21568e-19	7.49086e-18	0.0683596	7.19667e-18	4.44558e-20	0.0335547	6.72011e-19	0.465013	1.54115e-18	0.0179486	0	0.0036505	0.209694	0.0237501	0.0476713	0.0100223	0.0114411	0.012739	0.00294249	0.00409382	0.00170327	0.00135746	7.89672e-18	0.0547026	0	0	6.50175e-19	0.0112457	0.00437958	0.007179	1.45138e-18	0.00106342	3.30135e-20	0
TCGA-29-1763	0.185859	0.000524864	0.100464	0.0468037	0.0395318	0	0	5.85591e-19	0.0210794	8.43139e-18	9.77932e-21	0.00690437	0	2.47033e-18	0.0298343	0.0478194	0.00599838	0.0219657	3.6229e-19	0.0061064	0.0239915	0.00624822	0.173156	0	0.0370303	4.27652e-18	0.00156166	0.0220164	0.0558202	0.0100051	0.00318852	0.0309779	0.0403327	0.0067253	0.0163503	0.00316382	0.0194498	0.00510652	0.00875026	0.00420878	0.00532114	3.47202e-18	0.0155471	0.00811175	0.00676901	0	0.00289824	0	0
TCGA-30-1892	0.140828	0.0055341	0.260426	0	0	0.0121855	0	1.54489e-17	4.76392e-19	2.40258e-19	0.0253211	5.04564e-21	0.00343634	0	0.0532762	0.110382	0	0.131602	0	4.42702e-19	0.0542901	9.24852e-19	0.362056	0	0.101828	0	0	0.205303	0.000331177	0.045947	0.0183961	0.0351934	0.0134491	0.0193758	1.41812e-18	0.00242915	0	0	0.01443	0	0	0	0.168082	0.0102871	0.000596482	5.2791e-18	0.00459944	0	4.1e-18
TCGA-31-1956	0.348676	2.92686e-19	0.27029	0.0576536	0.0542784	0.031207	0.00877951	2.71983e-19	5.2581e-19	0.101857	0.00460324	0.0633262	0.0817415	0.022043	0.181403	0	0.0461918	0.0487747	2.64191e-18	0.0593783	0.0576482	6.42433e-19	0.295979	1.17472e-19	0	9.85738e-19	0.000441189	0.0296562	0.429391	0.0334015	0.0145509	0.192531	0.125526	0.0640117	0.00465642	0.00243956	0.00508458	4.16912e-18	0.00279256	0	0.0878249	0	0.244071	0.0359939	0	3.29054e-18	0	0	0
TCGA-04-1364	0	0	0.0541986	0	0.0231047	0	1.18773e-19	5.73396e-19	1.10612e-18	0	0.0106025	4.11885e-18	1.32108e-18	3.45729e-19	4.42656e-20	0.00227349	0	0.055563	0	1.60994e-19	0.00551615	2.07211e-21	0.254544	2.87938e-18	0	0	0.00134232	0.0780898	0	0.0171721	0.00374649	0	0	0	0.00331223	0.000368138	0.00157994	0	0.082641	1.1433e-18	0	7.71259e-18	0.0696654	0.00699697	0.0142285	0.00149254	0.00413461	7.75406e-19	7.73126e-18
TCGA-36-1576	0.256948	0.0137414	0.298127	0.0317381	0.026164	0.00967531	0.00800008	3.03552e-20	0	0.0200181	0	0.0194358	0.0366729	0	0.0571816	0.0573011	0.00220687	0.0148124	1.5864e-18	0.0151052	0.023063	0.00639913	0.329833	0	0.0401242	2.94565e-19	0	0.0652848	0.0811792	0.0262691	0.00918004	0.0920437	0.0779682	0.0176304	0.00457063	0.00085064	0.00280316	1.16788e-19	0.0255514	0.0439383	0.0295124	1.02634e-18	0.364365	0.0177925	0.00083145	0	0.000567549	2.5775e-19	1.27528e-21
TCGA-24-1557	0.101886	9.12033e-21	0.116341	0.0122726	0.0644963	0	0	1.47004e-17	0.00880088	1.62159e-18	0	0	1.71699e-18	0	4.59277e-19	0.0322299	0.00975236	0.0407103	1.90329e-18	0	0.019336	6.77626e-21	0.362322	0	0.0271845	0	0.00247528	0.0373826	0	0.0361769	0.00195728	0.0419331	0.0313038	0.0224103	0.0113102	8.05131e-20	0.00209515	9.17842e-19	0.0195659	0.00316237	1.68804e-18	2.61777e-18	0.0167348	0.0149951	0.000281303	0	0.00247472	0	3.28205e-19
TCGA-24-1930	0.324861	0	0.101474	0.0504594	0.0311341	2.49631e-20	1.70354e-18	5.60848e-19	0.0114314	0.0546268	0.0059233	0.0237944	0.0201008	0.00398671	0.0550011	0.0265545	0.0145725	0.0329669	1.03273e-18	0.00716928	0.0484416	0	0.31183	0	2.77736e-18	8.24593e-18	0.000329748	0.0222364	0	0.0295693	0.0073138	0.141481	0.112022	0.0357703	0.00978963	0	0.00396732	0.00122998	9.42558e-21	5.3368e-19	0.0319496	5.18035e-19	0.215398	0.024797	5.5204e-19	0	0.000172738	2.26962e-18	0
TCGA-09-2051	0.229257	0	0.0212476	0.0151486	0.0910831	0.00301606	0	0	0	0	0	0	0	5.3965e-19	0.0100515	0.0114742	0.0240011	0.0414258	0	0.00366493	9.87598e-19	0	0.321854	4.35045e-23	0.00413957	0	0.0023397	0.00936772	0	0.0201749	2.4267e-19	0.0434821	0.0501112	0.0136036	0.00659451	1.50468e-19	0.0106405	4.18368e-18	0.0299762	0.00844884	4.65705e-18	8.21016e-18	0.0265106	0	0	2.22604e-19	2.0979e-05	0	6.60919e-18
TCGA-24-1428	0.299728	0	0.0315148	0.0465496	0.170936	6.52221e-20	0	0	0.0174836	0	1.5248e-19	2.44736e-21	2.73535e-19	5.33724e-18	0.0165471	0.030454	0.00836731	0.0163001	0	0.00388868	0.00742933	0	0.287669	0	0.0473253	0	0.00375938	0.0117115	2.7176e-17	0.0211468	0	0.120169	0.101039	0.0285008	0.00500214	0	0.007824	1.79186e-18	0.0534864	0.00587956	8.74529e-05	4.82479e-18	0.088448	0.00762974	0	0	0	0	1.58294e-18
TCGA-57-1584	0.12067	2.19597e-19	0	0.0196239	0.028693	0	0.00843519	0	0.02466	0.000218562	0	0.00471906	0.0330158	0	0.00741519	0.00435213	0.00280015	0.0413069	0	0.00124892	0.00806386	0.000139104	0.369968	0	0.0573565	0	0.00112609	0.0438031	0	0.0290754	0.00245378	0.0354721	0.0268828	0.0190961	0.00820746	1.2326e-05	0.00364601	0	0.0180063	1.00007e-18	0	3.86148e-18	0.0546133	0.00286047	0.00676123	0	0.000814936	1.45185e-19	0
TCGA-04-1542	1.14342e-20	0	0.0602632	0.0177511	4.92184e-19	0	6.31126e-19	0	0.0172946	2.26001e-19	0.00669541	0.0141326	0.000303836	4.3523e-19	0.0327755	0.0482209	1.02559e-22	0.0375821	7.36817e-19	6.70405e-19	0.0284943	0	0.26543	1.6314e-18	0.0283812	3.70835e-18	0.000445886	0.0187441	0	0.0325941	0.0104114	0.00430341	9.02569e-19	0.0015139	0.010875	0.00244951	0	0.00465958	0.0625782	0.0337394	6.35954e-19	0	0.0649129	0.0141794	0.0200347	0	0.0055366	0	0
TCGA-29-1697	0.00793793	1.92348e-19	0.0327687	0.00535372	0.0285742	0	1.41684e-18	3.56983e-19	0	0	0.00602487	0.0103786	3.01306e-19	0	0	0	0.00884673	0.0382982	0	0.00168526	0.00388785	0.00837959	0.223568	1.06814e-18	0	9.68542e-19	0.000177407	1.76868e-19	0.0678363	0.0149392	0.00102158	0.0137257	0.00606259	0.0178149	0.00364128	0.000735197	0.00981804	2.85767e-18	0.0460945	0.0383522	8.45741e-18	1.25375e-18	0.0663505	0	0.00765653	0	0.00385516	0	0
TCGA-30-1860	0.289714	0	0.0894371	0.0339384	0.0350299	0.0149849	3.65669e-19	3.81307e-18	0	0.0259126	0	0.00705246	0.0881204	2.80592e-18	0.00991979	8.51959e-19	0.0140577	0.0660832	0	0.00355472	0.00213908	3.15404e-19	0.260596	0	0.0351809	1.21147e-17	0	0	0	0.0181481	0	0.107167	0.0778863	0.0265305	0	0	0.00998998	0.00305731	0.048407	0.015382	0.0121546	0	0.0239048	0.00538816	9.4098e-19	0	0.000422835	0	0
TCGA-24-2290	0.280764	0	0.075093	0.0509343	0.0426499	0.00863748	0	0	0.0338217	0.0275049	2.23167e-19	7.96474e-19	1.33344e-05	0	0.0752599	3.58579e-19	0.00591514	0.0181701	1.66866e-18	0.0139075	0.00838123	0	0.298426	1.73846e-19	2.13429e-18	0	0.000832002	0.0142096	0	0.0301537	0	0.0662044	0.0463682	0.0255514	0.0162306	0	0.0107896	0.00284012	0.0391907	0.00302468	0.0335354	0	0.018637	0.00531152	0.00295499	0.00993595	0.000104684	1.1274e-19	0
TCGA-61-2109	0.114534	0	0.0339079	0.0648235	0.0582932	0.00350304	5.01858e-18	9.72431e-19	0.0295816	0	1.1523e-18	0.00600109	0	0	0.00414235	0.0149578	4.28044e-20	0.0316048	2.6097e-18	0.00380029	0.0094259	4.69543e-19	0.431834	0	0.0383106	0	0.00267	0.00281299	0.0284638	0.0529214	0.00327338	0.0268754	0.0183734	0.0193265	0.0229008	0	0	0.00300635	0.0349008	0.0527663	1.12383e-18	0	0	0.00695902	0.00563953	0.00547905	0.000136495	0	1.34091e-18
TCGA-24-2026	0.235386	0	0.0346732	0.0369421	0.0746463	0.00328155	0	1.55145e-18	0.00342362	0.0195935	3.88017e-20	0.0173442	0.0288903	0	0.0218881	6.47738e-19	0.00808552	0.0038848	0	0.00637121	0.00478376	2.00672e-18	0.334065	0	0	1.03866e-18	8.76411e-05	0.0242565	5.558e-18	0.0317776	0	0.0479401	0.0333501	0.0176413	0.0159101	0.000447615	0.00500801	0	0.0193958	2.33739e-18	0.00360579	1.37444e-18	0.0611437	0	0	0.00122688	6.90158e-21	1.3059e-20	0
TCGA-24-2024	0.12552	0.00394242	0.120171	0.0167046	0.0819351	0	1.92603e-18	0	0.0261457	0	6.12588e-20	0.0129817	0.000509447	0	0.000503518	0.0230463	0.00418161	0.0152825	0	3.41923e-20	0.00271074	0	0.321479	1.93512e-18	0.050326	2.01154e-19	3.37785e-20	0.0136763	0.0368891	0.0261902	0.00363237	0.0194193	0.011283	0.00373854	0.00133702	0.000329419	0.00212297	5.73593e-19	0.0227932	0.00818247	1.05755e-20	0	0.244416	0	0.0291312	0	0.0016478	3.32757e-19	3.38994e-18
TCGA-29-1705	0.158641	0.000682629	0.230252	0.0100845	0.0301179	0.00247205	0.000252908	0	0	0.0033036	0	2.82961e-20	0	1.63563e-18	0.0234211	0	0.0021418	0.0785601	0	0	0.0179809	0	0.306901	1.26778e-18	7.37261e-19	0	1.1867e-19	0.0182281	0	0.0333883	0.00289577	0.0396952	0.027588	0.013855	0.00625372	0	0.00364267	3.47387e-18	0.0272634	2.20057e-17	0.00981894	0	0.329508	0.0108818	5.78698e-20	1.69222e-19	0.00116425	0	3.81509e-18
TCGA-61-2101	0.0748766	0.000474684	0.145379	0	0.0135022	0	0	0	0.0193669	0.010716	0.00141955	0.0105716	0.00265198	1.19504e-18	0.037585	0.0843436	0.0124319	0.0275413	0	0.00636298	0.00765248	0.00234029	0.389732	1.74948e-20	0.04326	0	0.000625164	0.0919266	0.0801587	0.0353524	0.00401803	0.013437	0.00750206	0.00682483	0.0073165	0	0.00132467	4.47315e-18	0.0221097	0.0281039	8.8088e-19	4.6889e-19	0.191194	0.00437247	0.000677285	1.0448e-18	0.00293037	0	1.20978e-17
TCGA-23-1809	0.0257978	4.44221e-20	0.114249	0.00364199	0.0377929	0	0	1.17324e-18	0.0143695	0.00393893	0	3.48005e-19	1.22496e-18	0	0.0278185	1.71345e-19	0.00795717	0.0593005	4.46019e-19	1.39545e-05	0.00227384	9.21555e-21	0.165112	1.00727e-19	0.01411	0	0.00130149	0.0426137	0.0262507	0.0268131	1.11242e-19	0.00972189	0.00627125	0.00304945	0.00939037	0.00220856	0.0154116	0	0.0227398	0.0130568	2.38918e-18	0	0.0500504	0	0.0147649	0	0.00984183	0	8.41382e-18
TCGA-09-2056	0.179223	0.000576811	0.0055907	0	0.0301218	0.00821548	2.61052e-18	0	0	0.0665578	0.00268776	0	0.00942985	0	0.0209737	0.00717789	0.000780493	0.109762	0	0.00402181	1.86718e-18	1.47795e-18	0.43943	0	0.095956	0	0	0.0545327	0	0.0667067	2.38851e-19	0.0351621	0.0139862	0.0167614	8.33097e-20	0	0.00473563	5.5897e-18	0.0476023	0.0446188	0.0113365	9.56281e-19	0.0155788	5.48846e-19	0.00168966	0	0.000550641	0	0
TCGA-24-2280	0.0948675	0.045915	0.336196	0.000629869	1.20229e-17	4.05935e-18	0	3.11465e-18	0.0649866	0	0.00542691	0.0233043	7.25705e-18	1.03248e-18	0.0222216	0.0845721	3.21007e-18	0.00781504	0	0.00404691	0.0804286	1.29598e-18	0.171124	0	0.149559	2.24857e-19	1.93521e-19	0.135313	0.155896	0.0107209	0.0192962	0.0187406	0.0182836	0.0106892	2.43473e-20	0.00501867	0.000417413	0	0.00423553	1.29962e-18	0	0	0.174485	0.0428508	0.00949386	7.14112e-19	0.0058534	0	0
TCGA-24-1843	0.230553	0	0.0288915	0.035155	0.0883115	0.0199975	2.58947e-18	0	3.7483e-19	0	0.00963191	0.0286211	0.0273487	8.5495e-18	0.0157818	0.00677042	5.9514e-19	0.0868648	2.1492e-18	0.000692014	0.00553674	0	0.246039	4.45948e-19	0.0437867	0	0.000520579	0.0152795	0	0.0188525	0	0.112941	0.0792948	0.0251716	0.00479321	6.95022e-07	0.000718022	2.14019e-18	0.0387049	0.000229465	0.0046392	0	0.0994563	0.00426029	0.0103978	4.51863e-21	0.000291347	0	0
TCGA-25-1315	9.22962e-20	0	0.0354384	0.000273069	0.064433	0.00339406	0	4.20018e-19	0	1.15742e-18	0.00947723	0	0	0	0.0149344	0	0	0.0575745	1.95473e-18	0	0.00435386	0	0.212037	1.99002e-18	0.019009	1.06231e-18	0.00089788	0.011315	0.0241169	0.0135918	0.00774202	0.00698546	0.00601172	0.00653036	0.00404483	0.00424772	0.00833606	3.67397e-18	0.0161121	0.00693489	0	2.58861e-18	0.0841779	3.24396e-06	0.0190455	1.12646e-18	0.00440749	0	1.14012e-17
TCGA-59-2355	0.16691	1.05295e-20	0.0894549	0	0.0312942	1.08893e-20	0	2.7026e-19	0.0120082	0.00926365	0.00880854	0.00564617	0	4.7444e-18	0.00891835	0.0799453	0	0.0956465	0	0.00160857	0.0247263	0	0.423091	5.39878e-19	0.0981951	0	0.00168244	0.0597511	4.37316e-19	0.0579177	0.0172778	0.0344178	0.0344437	0.010657	0.0121118	0.000778344	0.00265106	1.85703e-18	0.00900995	0.0159634	8.04535e-19	6.51006e-19	0.0255703	0.0108625	0.00454151	0	0.000620288	4.26602e-19	2.30032e-18
TCGA-24-1426	0.114266	4.72679e-19	0.0648782	0.0448928	0	5.02313e-19	8.15599e-22	9.54012e-19	0.0485439	5.16544e-19	0.00490745	0	0	3.37663e-18	0.00838525	0.0227894	0	0.0672381	1.02582e-18	0.00701179	0.00697183	0.0032083	0.236436	9.23545e-19	0.0229095	0	0	0.0132218	0.0974621	0.0378955	0	0.0191173	0.0142015	0.00674704	0.00312976	0.0034117	1.74892e-18	0.00585264	0.0310452	0.0647705	0	8.20153e-19	0	0.00104909	0.0229512	0.00394478	0.00568844	0	1.98185e-18
TCGA-25-1634	6.7032e-19	1.31739e-19	0.0903596	0.00794628	0.0900409	0.000851621	3.04743e-19	0	0.00397917	0	0.000291291	0.0012136	1.79753e-18	5.94151e-19	0.00824453	1.73276e-20	0	0.0132969	0	0	0.0038519	2.38991e-18	0.277776	0	0.0344153	8.22577e-18	0.00224864	0.00792949	0.0032605	0.0194435	0.00127152	2.45731e-18	0	0	0.0139993	0.00223932	0	4.63585e-19	0.0556629	0.065105	0	0	1.37905e-18	2.07661e-20	0.0168257	3.25058e-18	0.00723135	5.71261e-19	2.96228e-18
TCGA-04-1343	0.186792	0.0315993	0.202929	0.0369932	0.0563183	0	1.02223e-18	0	0.0156206	0	0.000108582	1.17986e-19	0	5.15405e-18	0.0040921	0.0191163	0.0029601	0.0436097	2.19614e-18	0	0.00829803	7.37481e-20	0.339087	0	0.0663124	1.6592e-18	0.00191311	0.0883675	0	0.030593	0.00403386	0.0380435	0.054865	0.0150662	0	0	0.00127769	0.00516269	0.0445644	4.73042e-20	0	1.24918e-17	0.239456	0.0109765	0.00236718	0.000401985	0.00098075	5.44198e-20	0
TCGA-23-2084	0.166968	0	0.0905223	0.00844914	0.0672228	0.00965899	4.92595e-18	0	0	1.28366e-20	1.97777e-19	1.42549e-18	4.01438e-19	8.24942e-18	0.00666806	0.0389785	3.79785e-18	0.0474882	3.37586e-18	3.1911e-22	0.0109153	4.38065e-18	0.367328	1.11727e-18	0.0847653	8.26979e-19	0.0023492	0.0618659	0	0.0360401	0.00141012	0.0485746	0.0416588	0.0260431	0.0107834	0	0.00404237	0	0.0407264	0.0133862	0	0	0.0791336	0.00797152	4.48061e-20	2.27035e-19	0	1.87345e-19	4.77009e-18
TCGA-13-0883	0.118509	0.00282658	0.305164	0.0181285	0.0485503	0.00251149	0	0	0.0331465	0.0121214	1.18747e-20	0.0184256	0.00972902	4.29956e-19	0.0678214	0.0345806	0.0145907	0.0226696	6.17907e-19	0.0267729	0.00434209	0	0.263038	4.62474e-19	0.0560592	1.06106e-18	0	0.00572451	0.373521	0.0321996	0.000312094	0.0416162	0.0257542	0.0185216	0.0125184	0.000481661	0.000324242	0	0.022226	2.58992e-18	0.0147868	0	0.175001	0	0.012458	0	0.000386924	0	0
TCGA-24-1616	0.0200875	0.000991697	4.15889e-19	0.0211924	0	0	0	0	0.00049779	0	0	1.88867e-19	0.0113401	0	0.0295985	0.054116	0	0.0210647	0	0	0.0140576	0.000732868	0.347172	4.37979e-21	0.0326668	0	0	0.12561	0.00693322	0.0360017	0.00403423	0.0151813	0.00654244	0.00395357	0.00470787	0.00518572	0.00323165	0	0.0354773	0.00751926	6.09942e-18	7.34193e-20	0.00490983	2.93062e-19	0.00146222	0.00462393	0.000665236	3.74391e-19	2.24054e-18
TCGA-61-2102	0.0717287	0	0.407944	5.99595e-20	0	0	1.43076e-20	3.3865e-18	1.50756e-20	0	1.72432e-19	0	2.73111e-19	9.20789e-18	0.047027	0.0704366	0.00822108	0.00120296	0	0.0185172	0.100457	3.66501e-19	1.08682e-19	7.06367e-20	0.327702	0	0.00231895	0.141014	0.338479	0	0.0278626	0.027476	0.0324644	0	0.0134642	0.000155312	0.00376366	2.01609e-18	0.0348621	0	0.0159727	0	0.0193199	0.05745	0.00945538	0	0.00931939	0.00333913	0
TCGA-24-1423	0.07687	0.00202539	0.120768	0.0124727	0.0335934	2.24645e-20	5.85463e-19	0	0.017014	3.02938e-19	0	0.020899	0.00175068	0	0.0153883	0.0349004	0.00476265	0.0351281	1.47227e-19	0.00165204	0.0280095	8.86701e-20	0.298369	0	0.0170523	0	0.00129813	0.0310487	0.00343654	0.0297216	0.0108098	0.0204712	0.0116726	0.0257933	0.00944519	0.00207834	0.00988089	3.2012e-18	0.000935456	0.0210033	0	2.37949e-18	1.69683e-19	0.00740841	0.00821223	0	0.000848569	0	4.81599e-18
TCGA-57-1585	0.180299	0.0231289	0.326286	0.00382845	0.0478552	0	8.08606e-19	1.30734e-19	0.0255809	0.0043429	0	0.00038159	0.00122106	1.29149e-18	0.0958864	0.0722578	0.00574494	0.0136678	2.25705e-18	0.0168534	0.014761	0	0.352065	3.67756e-19	0.0729475	0	0.000250768	0.0945131	0.0903299	0.0365301	0.00112031	0.0327793	0.0405056	0.00794207	0.0081064	0.000785808	0.00255676	2.85415e-18	0.0058306	0.00385491	0.013368	9.10342e-19	0.213418	0.00763901	6.51451e-20	4.08074e-19	0.000286687	4.02539e-21	3.49149e-18
TCGA-23-1022	0.0746699	0	0.0535919	2.57266e-19	0.129918	1.61413e-19	3.19979e-18	2.69622e-18	1.0072e-17	2.04994e-17	0	6.08643e-19	2.92147e-18	0	0.032917	0.00924701	0	0.0227269	0	0	0.0168892	7.83983e-18	0.401281	5.68471e-18	3.39528e-18	0	0.00587715	0.102012	0.015536	0.0478933	0.00508245	0.00476255	0.0170622	0.00403455	0.00309081	0.00192555	0.000772064	2.42714e-18	0.0952513	0.0788406	1.52301e-17	0	0.176322	0.0142295	0.0188184	0	0.00209289	1.66543e-18	3.94559e-18
TCGA-09-0366	0.247308	3.43174e-20	0.0219924	0.0377301	0.0970235	0	0	0	0.0182039	0.0662512	0	3.63287e-19	1.55741e-20	0	0.0395714	0	0.0140813	0.0282731	2.26814e-18	0.00271509	1.13827e-18	0.00142625	0.445464	1.20866e-18	0	1.39299e-18	0.0016293	1.00859e-18	0.0149673	0.0369388	8.27216e-19	0.146917	0.10465	0.0312382	0.00574589	2.11613e-20	0.00276367	1.62256e-19	0.0319685	0.0185163	0.0908793	8.04175e-18	0.00510765	0.00288777	0	2.98115e-05	0.000154644	0	6.81612e-19
TCGA-61-1741	0.198162	0	0.164811	0.0649606	0.030507	0	0	0	0.0367738	0	0	0.0030885	0	6.93264e-18	0.0192727	0.0333591	0	0.0117832	0	0.00685012	6.97397e-21	0	0.247336	1.76367e-19	0.00869504	5.46742e-18	0.00250846	0.0701783	0	0.0205621	0.00133105	0.00236862	0.0173504	0.00711226	0.0175335	0.00330327	8.62151e-19	0.000209731	0.0295584	0.0151458	0	1.6016e-17	0	0	0.0142188	0.0122992	0.0076559	0.000605948	0
TCGA-24-1431	0.142826	0.00282414	0.0235065	0.0297069	0.069597	0.00162899	1.48446e-18	1.50712e-18	0.0094147	0.025454	0.0073638	0.0153285	0	0	0.00824528	0	9.54406e-19	0.0161376	0	0.00155312	2.21013e-18	1.85741e-19	0.467285	5.89664e-19	3.65841e-19	1.00714e-18	0.000151663	0.0410534	6.78946e-18	0.0448516	0	0.0350207	0.0208044	0.0130476	0.0127926	1.51103e-20	0.00348693	0.000174505	0.063362	2.72838e-18	0.00106647	4.42212e-18	0.165057	0	0.00421773	0	0.000464785	1.12377e-19	0
TCGA-24-0968	0.224291	0	0.161775	0.0391119	6.1007e-19	0.0113332	0	2.65359e-18	0	0.000388099	0.00586069	0.0169148	0.0150577	0	0.0361277	0.001445	0	0.0716502	0	0.00489306	0.0131851	0	0.347447	0	0.0493124	0	1.53975e-05	0.0528233	0	0.0380723	0.00199737	0.0991797	0.0754233	0.0266063	0	0.000550815	0.00589939	3.2831e-19	0.0392635	0.00876689	0.024234	0	0	0.00775254	0.00100007	4.85323e-19	0.000476573	1.0097e-19	3.29566e-18
TCGA-24-1418	0.138697	0.00303194	0.270206	0.0506544	0.0182309	0.00515793	0.000378495	0	0.000579736	2.16101e-18	0.00169167	0.00606893	0.011478	0	0.0236155	0.000322068	3.56509e-19	0.0347111	1.16455e-18	0.00237131	0.00950258	1.29824e-21	0.269774	8.253e-21	0.0179229	0	3.8951e-20	0.0202376	0.00333424	0.0273443	0.000586196	0.0167328	0.0121546	0.00152859	0.00889676	0.00235841	0.00354922	0.0148258	0.0176126	0.0226497	0	0	0.079274	6.07331e-20	0.00899817	0.00763423	0.00152161	5.64419e-20	0
TCGA-25-1320	0.128934	2.29788e-21	0.307215	1.17467e-20	3.64516e-18	2.34606e-19	0	5.38755e-18	0.0311486	3.71728e-18	0	4.98473e-20	0	0	0.0448487	0.0794843	0	0.0232899	0.00124444	0.00489672	0.00975415	0.0039387	0.308889	0	0.0641322	0.00139359	0	0.0891647	0.0634508	0.0231387	0.00133357	0.0198503	0.0095884	0.0122345	0.0056486	1.05711e-20	0.00252673	0	0.00866221	0.0110974	0.000842852	5.12203e-19	0.178799	0.00382222	0	1.99889e-18	0.00179788	1.49016e-19	8.42716e-18
TCGA-09-2045	0.147376	4.90095e-21	0.0496682	0.0222812	0.023531	0	1.11832e-18	0	0.0438945	0.036586	0	0.00738068	0.00626599	3.28527e-19	0.00522294	0.0267596	0.000707637	0.0324568	0	0.000918794	3.23216e-20	0.00138665	0.353365	3.13017e-19	0.0227752	0	0	0.0294256	0	0.0295533	0	0.0183033	0.0214392	0.0128732	0.0105017	0.000835312	0.0118308	0	0.00646756	0	0	1.7582e-19	0.0733369	0.00171646	0	0.00187684	0.000997874	7.95518e-20	1.13786e-18
TCGA-23-1023	0.216606	0	0.13847	0	0	0	5.13896e-18	2.78001e-17	0	7.37689e-18	0	7.16835e-18	2.0263e-19	0	0.0142807	0.0509859	0	0.0239205	1.77405e-19	0.00105618	0.159173	0.000969876	0.380988	0	0.130588	0	0.00348029	0.337119	0.0210202	0.0302962	0.0826953	0.0284542	0.0443598	0.00155972	0	0.00149667	0.00434363	0	0.0364589	0	0.00742884	8.16964e-19	0.241836	0.103842	0	1.35455e-17	0.000530373	0.00383601	8.72739e-18
TCGA-29-1693	0.161384	0.00426564	0.121406	0.00301922	1.36156e-18	0.00683029	0	2.56771e-18	0	0	0.00575615	0.00727154	0.0201763	0	0.00913452	0.0259345	1.05175e-18	0.152237	0	0	0.000843398	0	0.375809	3.86938e-19	0.002639	8.77388e-19	9.1098e-19	0.0534341	0	0.0553412	0	0.0458358	0.0271175	0.0187314	0	0.000764922	0.000510093	2.48473e-19	0.00791419	9.72392e-18	2.00022e-19	7.65278e-19	0.159897	1.01724e-18	0.0114612	0	0.00152153	2.32734e-18	7.17074e-20
TCGA-04-1655	4.34206e-19	0	0.076224	0.00296793	0.0630709	0	0	5.43405e-20	0.00252481	0	0.0106397	0.00737072	0.000878542	0	0.00255863	0.0027145	5.73232e-19	0.0486949	1.61223e-18	6.99422e-19	0	0	0.327019	0	0.00637217	0	0.00200887	0.0504243	0	0.0260763	1.47703e-18	0	9.0238e-19	9.97505e-05	0.00344897	9.88266e-21	0	2.13349e-18	0.0471064	0.0347583	0	0	6.5787e-20	0	0.0259895	0	0.0111386	0	1.36983e-17
TCGA-24-2038	0.0589867	0	6.89021e-19	0.0447976	0.0232464	0.00123264	0	0	0.0386732	1.50417e-18	0.0011751	0	0	0	0.0427746	0.0462578	0.0100078	0.0361415	2.79364e-21	0.0106707	6.87253e-19	0.00149099	0.320608	1.02842e-18	0.0145512	0	0.00152137	0.0586676	0.123252	0.0319326	0	0.00294073	0	0.00300349	0.0150645	0.00163147	0	0.00116964	0.0257435	0.0299399	0	3.45252e-18	1.37272e-17	6.03253e-19	0.00620148	0	0.0024793	0.000864284	0
TCGA-09-2054	0.0748765	0.0144648	0.263895	0.0192557	0.0154592	0	0.000382196	0	0.010378	1.80827e-18	0	0	0	1.85462e-17	0.0140796	0.00937832	1.22291e-19	0.00772675	0.00620062	0.000986869	0.0554106	0	0.00241359	3.88778e-20	0.103001	7.4481e-19	0.00147292	0.122508	0.0812819	6.27862e-19	0.00977902	3.93712e-20	0.00531483	0	0.0102681	0.000301178	0.000938551	2.43521e-19	0.0206824	0	0	1.85586e-18	0.137214	0.0193609	0.0120584	0.0115003	0.00607782	0	1.78811e-18
TCGA-09-1665	0.165695	0	0.0526344	0	0.0374852	0.0189341	0	0	0.0181053	0.0269556	0.0147412	0.0181925	0.0294443	1.2818e-18	0	0	1.88789e-19	0.13655	0	3.27798e-20	0.00472931	2.51554e-18	0.299907	7.30151e-19	0.0169172	0	0	0.0196099	1.09307e-18	0.0315469	0.00127097	0.047067	0.0413318	0.0158918	0.00683738	0.00108889	0.000145325	0	0.0224818	0	0	5.82115e-18	0.0482047	0.00145585	0.00907309	0	0.00151251	0	0
TCGA-25-2399	0.224457	0.00331693	0.193272	0.0205157	0.0818651	1.82138e-19	0	0	0.0295653	1.09701e-18	0	0.00427118	0.00888465	0	0.0150957	0.0216672	1.20297e-18	0.0435675	2.52415e-18	0.00492391	0.01808	0.00625858	0.39209	0	0.0658264	2.1481e-18	1.17699e-19	0.0222598	0.0422011	0.0423755	0.00381967	0.0457253	0.0429692	0.0238107	0.00334975	0.000983154	0.00395877	0	0.0151255	0.0218555	0.00152784	0	0.100633	0.00570588	0.00682709	0.0042904	2.15464e-05	1.74526e-19	1.29999e-18
TCGA-24-1846	0.193953	0	0.115048	0.0283746	0.180861	0	0	3.99048e-18	0.0266975	0	0	0	0.0010356	0	0.0150018	0.0358403	0.00222382	0.0648247	6.93367e-19	0.00105078	0	0	0.234715	1.07845e-18	0.0525985	0	0.00382761	0.0020316	0	0.0201017	6.27624e-19	0.0485922	0.0370389	0.0163701	0.00899492	3.18558e-20	0.00538975	0	0.0355865	0.0473482	3.20685e-18	0	0.0262956	0	1.14003e-19	0	0.000161393	1.23268e-18	4.88914e-19
TCGA-24-1847	0.288865	0	0.101005	0.037674	0	0.000692531	0.00411494	2.4891e-18	0	0.0580096	0.00232137	0.0776815	0.06247	0.0190474	0.057268	0.0281136	0.0234006	0.0392999	2.53946e-19	0.00921581	0.0104578	0.00404508	0.361779	0	0.0475099	1.63727e-18	0	0.00708207	0.0201539	0.0402502	0.00495646	0.0963571	0.0754014	0.0302485	0.000938088	0.00216823	0.00377408	1.27779e-19	0.0037462	0.00972728	0.025229	2.08714e-23	0	0.00386716	0	5.34421e-20	5.52074e-05	9.3206e-19	7.12857e-19
TCGA-24-1560	0.0493422	0	1.2662e-18	0.0217863	0.00552281	0.00425344	6.22419e-18	0	0.010719	0.0109243	1.10581e-20	0.0201376	0.0101963	0	8.27364e-19	0.00788412	6.53837e-20	0.0618537	2.43777e-18	0	0.0081091	0.00262966	0.282843	1.55418e-19	0.0352125	6.60367e-19	0.000862696	0.00207649	0	0.02117	0.0125659	0.022403	0	0.0286515	0.0130903	0.00720799	0.00856127	0	0.0264418	0.00312905	1.02275e-18	0	6.6105e-18	3.0374e-19	0.00531324	0.0030414	0.00336392	7.68705e-19	2.60193e-18
TCGA-61-1733	0.141116	0.00114646	0.187736	0.0166295	0.0857971	6.48419e-21	0	0	0.0180964	2.16571e-19	0.00250755	0	3.47092e-18	1.01796e-18	0.00492991	0.00934062	0	0.047335	0	1.06356e-19	5.62242e-20	0	0.191079	0	0.0443571	0	0	0.0192242	1.68593e-18	0.0207698	7.57592e-19	0.0198586	0.0121809	0.0141097	0.00390181	0.00140507	0.0012348	0	0.0303844	1.11612e-18	0	0	0.248338	0	0.0199012	0	0.00626905	0	1.04686e-17
TCGA-61-1910	0.10367	0	0.0562453	0.00797798	0.0688572	6.2819e-20	8.1459e-18	5.97223e-19	0.0723215	0	0.00547902	0.0141246	0	1.86289e-18	0.0447025	0	0.00101014	0.0119907	0	0.00120982	0.0363311	0.00495817	0.287266	0	0	3.08984e-18	0.00081394	0.0433914	0.00980985	0.0214633	0.00981517	0.0178859	0.016412	0.0122652	0.0136667	0.00696957	0.00423589	0	0.0397419	8.42515e-19	1.87168e-18	0	0.0606499	0.0251551	0.00730408	1.33302e-20	0.000224389	1.94668e-18	2.37159e-19
TCGA-04-1347	0.0273455	0.00588537	0.164607	9.39238e-19	0.0331446	8.62475e-20	1.18584e-19	0	0.00181423	0	0.0130862	0	0	1.42908e-18	0.00313295	0.028219	8.95594e-19	0.0707762	0	0	1.24064e-18	0	0.193625	5.16544e-18	0.0134203	7.58539e-18	0	0.111908	3.46064e-18	0.0115061	0	2.89115e-19	0	0.00868482	5.43724e-05	0	0	1.07331e-18	0.0876869	0.0355181	1.38772e-18	0	0.197794	0.000429776	0.0117933	1.08113e-18	0.00899611	7.21969e-20	0
TCGA-25-1323	0.0655759	7.49156e-21	0.0925546	6.07238e-19	0.0129325	0	1.5746e-18	0	0.0134314	3.9617e-19	0.00368517	0.0101224	1.95665e-18	0	0.0129757	0.0675997	0	0.0301165	0	9.1103e-22	0.0112861	0.00420408	0.325925	0	0.0905286	0	0.00144828	0.0658094	0.0244921	0.0397328	0.00153306	0.0131449	0.014996	0.00825749	0.00843598	0.00141223	0.0010831	2.1113e-18	0.0461061	0.0644801	0	3.31565e-18	0.0376209	0.00186031	0.00947175	0	0.00481644	0	3.31268e-18
TCGA-25-1632	0.00713117	0.00467388	0.0758601	0.01366	0.0838372	1.01833e-21	2.20327e-18	2.05186e-19	0.0188983	0	0	0.0103094	0.0112007	0	1.4837e-19	0.00573217	0.00414865	0.0143613	2.81003e-18	0	0.00937618	0.00518548	0.362888	0	0.0160111	1.05485e-18	5.12634e-05	0.00337533	0.0273885	0.0317942	0.00341561	0.000765062	0.0013085	0.00522461	0.00953765	0.00359404	0.000137035	0	0.041162	0.0533465	0	5.98057e-18	0.0464205	0.00381168	0.0144582	0	0.00194378	5.70987e-19	1.35502e-17
TCGA-20-0987	0.274267	0	0.00427726	0.0524578	0.188474	0	1.47096e-19	0	0	0.032732	0	0	0.0147206	1.49031e-18	0.0751787	3.74568e-18	0.0125982	0.0151126	0	0.012963	0.0151293	0	0.475817	0	0.00596059	0	0.00365337	0.00110201	0.0521285	0.0601678	5.63767e-05	0.170606	0.133089	0.0460646	0.00191992	0	0.0320633	0.00547042	0.041924	0	0.11687	2.51107e-18	0.158573	0.0270704	0	2.5693e-19	0.000243547	0	1.51864e-17
TCGA-24-1924	0.314381	7.97211e-20	0.0621194	0.0407575	0.0752843	0.0225739	0	4.48845e-18	6.80995e-18	0.0148063	0.00435202	0.00660857	0.0201115	0	0.028683	1.42504e-20	0.00208302	0.0598212	3.51392e-19	0.00737035	0.0125812	0	0.312996	2.78479e-19	8.84505e-18	0	3.03706e-20	0.0440806	0	0.0171311	0.00121398	0.113808	0.064927	0.0396267	0	0	0.0048407	1.88798e-19	0.0288342	0.0161684	0.0240002	0	0.0566982	0.00703365	0.000757783	1.39489e-19	0.000147012	0	0
TCGA-57-1583	0	0.00266567	0.115817	3.55926e-19	0	0	0	0	0.0162932	0.00207047	0.00816583	0.0301051	9.6914e-19	1.80223e-19	0.00850091	0.0682393	0	0.0128847	3.08151e-18	0	0.0439333	0.00587218	0.173689	0	0.00948282	7.25201e-19	8.10145e-20	0.12521	0.0150635	0.0163727	0.00990974	0.00209992	1.97459e-19	0.00509686	0.00547837	0.00347234	0.00609527	0	0.0523677	0	7.88273e-18	0	0.143906	0.0171813	0.00268405	1.2135e-18	0.00232407	4.02002e-19	0
TCGA-23-1113	0.0516855	0.000429261	0.136532	0.00639614	0.0169584	0	0	9.16613e-19	0.0218086	1.33516e-18	0.00709728	0	4.59504e-19	1.40403e-19	0.0117817	0.0122298	3.80343e-19	0.0508469	3.86912e-18	0	0.00101102	0	0.373961	0	0.0267148	0	0	0.0613304	5.55691e-18	0.0450497	0	0.017283	0.0120214	0.00629527	0.00210134	0.00069766	0.00106575	0.00101209	0.0555662	0.00177389	2.61151e-18	0	0.238159	0.00339897	1.26099e-19	2.39342e-20	0.0169804	0	0
TCGA-24-1562	0.109942	0.000950239	0.214501	0.0282758	0.0201258	0.00263224	4.31108e-19	1.31141e-18	0.0220425	4.93388e-20	0.00329294	0.00727213	0.00569491	0	0.0515264	0.0613509	5.54045e-21	0.0648356	2.30138e-18	0.00430283	0.00852191	6.40351e-20	0.421345	0	0.039713	0	0.000170431	0.0542135	1.3269e-18	0.0545166	0.00446526	0.0221917	0.0141193	0.0117957	0.0118464	0.000808827	0.00311531	5.00998e-19	0.0122757	0.00570563	0	1.34403e-18	0.0980926	0.00200878	0.00397429	0.0048677	0.000556297	0	0
TCGA-24-2036	0.028142	1.59625e-20	0.145733	0	0.0482962	5.4466e-22	0	0	0.0448468	2.65257e-18	1.04714e-18	0.0127513	4.10953e-19	0	0.0116226	0.0562576	0.03524	0.0185109	0.0063018	0	0.00238375	0.0116394	0.283949	9.08978e-20	0.0481895	0	0.00233847	0.0535405	0.054324	0.03018	0.00311589	2.75878e-19	0.00316073	4.62297e-20	0.0114322	0	0	0	0.0227446	2.59696e-18	0	0	0	1.60797e-19	0.0168102	3.28934e-18	0.00321432	3.24508e-18	0
TCGA-23-1123	0.26094	0	0.0479705	0.0262137	0.00639316	0	0.0128758	1.01212e-18	0.01126	0.0421607	0.00969296	0.0449851	0.0310278	2.01362e-20	0.0189702	0	0.00794688	0.054005	0	0.00731795	0.00381052	0	0.185637	4.1331e-19	0.0255534	0	0	0.0959552	0	0.00849687	0.00201261	0.0913434	0.0807536	0.0472927	0.00663413	0	0.0127765	3.39927e-18	0.0373525	8.74053e-20	0.0168193	3.51274e-19	0	0.0104821	1.09878e-19	5.33166e-19	0.000103318	0	0
TCGA-29-1778	0.216291	9.26802e-19	0.00205385	0.0250081	0.0101567	0.00904807	0	0	0.0320591	0.0328471	0.00215783	0.0429871	0.0265383	5.37563e-19	0.0362861	0.0254212	0.00670025	0.0319332	2.91554e-18	0.0190126	0.039618	0.0152224	0.202076	0	0.0777837	3.32022e-18	0.00091631	0.0590578	0.105282	0.0139187	0.0123447	0.03067	0.0241568	0.00803163	0.0146478	0.00356269	0	2.89293e-18	0.0408446	3.0992e-18	0.00515011	1.09529e-18	0	0.0182494	0.0123589	0	0.00016712	0	4.64806e-18
TCGA-24-1425	0.150437	0.240047	0.371711	1.68629e-18	1.52964e-17	0	0.00274536	0	0.0336608	9.87195e-19	0	0	0	0	0.0424963	0.066255	0	0.0123877	0.00124167	0.00825133	0.126672	0.000556199	0.232776	0	0.154103	0	0	0.221116	0.134886	0.016212	0.0526462	0.032396	0.0452026	0.020312	0	0.00385095	0.00723945	2.3879e-18	0.00215924	3.5297e-18	0	1.77227e-19	0.10783	0.0595308	0	9.30518e-19	0.000620475	0	5.16842e-18
TCGA-25-1623	0.368999	0.0374138	0.279189	0.0519699	0	0.00328816	0	0	0.00641341	0.0471303	0.00810074	0.0302872	0.0250478	0.00200895	0.0593787	0.0621695	0.0172512	0.0285906	6.23531e-19	0.0153256	0.00238256	0.0169689	0.300761	4.51388e-21	0.129017	0	0.000383428	0.0974638	0.0137933	0.0272012	2.70779e-21	0.104879	0.0853837	0.0287624	0.00220263	0.00171353	0.00763766	2.49516e-18	0.015818	0.0385839	0.039265	0	0.19873	1.10485e-18	8.85508e-19	0.00305531	0.00060714	0	4.64774e-18
TCGA-61-1738	0.191131	1.80897e-18	4.7007e-18	0	0.0256635	0	0	3.12592e-18	1.32251e-17	0	0	1.68245e-19	0.00542865	1.42938e-18	6.10626e-18	3.44896e-18	5.38086e-18	0.0608197	6.67501e-18	0	0	0	0.356065	0	2.54768e-18	0	4.6599e-19	0.101766	0	0.0298666	1.8456e-18	0.0936943	0.063095	0.017171	1.22449e-18	0	0	9.41935e-18	0.0610477	6.48356e-19	1.8637e-18	0	0	0	5.87786e-20	0	0.0014288	4.40715e-19	2.13828e-18
TCGA-61-1736	0.168865	1.38385e-19	0.0670319	0.0458329	0.105375	2.30403e-24	0	0	0.034276	2.5595e-18	0	1.23651e-18	0	2.00349e-18	0.0311304	0.0144782	0.021872	0.0437205	0	0.00300748	0.0419304	0.00265567	0.416102	0	0.028785	0	0.00238473	0.0130833	0	0.0463401	0.0076411	0.0193489	0.0232715	0.0115006	0.0173055	0.0017633	0.000770653	0	0.0109678	0.0109936	0.00443749	0	0	0.0116017	0.00491111	8.75039e-19	0	0	3.69975e-20
TCGA-24-2289	0.194553	5.46416e-19	0.288706	0.00458267	0.00891721	4.88683e-20	4.86935e-19	3.09294e-19	0.0268011	0.0284824	5.0325e-20	0.0311564	0.0154449	2.95786e-05	0.0139976	0.0518162	0.00559923	0.00663222	0	0.00151415	8.40208e-19	0.0054128	0.304902	0	0.0247017	0	0	0.0525942	1.73047e-18	0.0238713	0	0.066669	0.0564026	0.0273217	0.00622397	0.00178892	0.00557874	0	8.64314e-05	0.0157807	0.0286053	5.33802e-19	0.230994	8.32098e-19	0.0076102	0	0.000179964	0	8.2741e-19
TCGA-29-1784	0.297247	0.00264019	0.0461332	0.0927174	0.102669	0.0178166	1.78975e-18	1.90575e-19	1.05093e-17	0.0124209	0.00796019	0.00260337	0.0116326	0	0.0210556	3.08777e-19	0.0275123	0.134576	0	0.00988228	0.00496459	0	0.27205	1.77727e-19	0.037235	0	0.0016366	0	0	0.0156841	0.00079532	0.121308	0.0569474	0.0497008	0.00278753	4.81499e-20	0.0005293	0.00218312	0.0547122	0.0123519	0.0141052	8.32704e-18	0	0.00653737	5.18513e-20	0	0.00196776	1.20279e-18	0
TCGA-24-1469	0.0756408	0	0.10497	0.0101004	0.0476819	0.00519214	2.17698e-18	0	0.0185302	0	0.00150822	0	0	5.15104e-18	0.00594091	0.00287315	2.16919e-19	0.0232366	1.45093e-18	0.000637139	0	0.00408742	0.235626	4.0354e-20	0	0	0.000622623	0.0316252	5.80237e-18	0.0156538	1.30083e-19	0.00489063	0.00806935	0.0080726	0.00162949	9.50911e-21	0.00180199	1.18804e-18	0.0213605	0.0219989	1.01101e-17	2.85443e-18	1.83269e-18	0	0.00313067	4.86617e-19	0.00346798	8.18511e-19	0
TCGA-25-2404	0.171116	0.00222596	0.235473	0.00708256	0.0403264	0.000627247	3.13853e-18	0	0	0	4.58683e-19	0	1.12944e-18	1.85941e-18	0.00979584	0.0538821	0	0.0421162	0	1.81433e-20	0.0137071	0	0.41127	1.46427e-18	0.0467522	0	0.00096493	0.0250352	6.92878e-18	0.0547432	0.00575406	0.0414808	0.0372742	0.01356	0.00628121	0.00177799	0.00534179	0	0.014151	0.0167871	0	0	0.183223	0.00256395	1.54866e-20	3.43657e-19	0.000333929	0	0
TCGA-04-1338	0.212934	0.000362436	0.279024	0.00319759	0	0.00428953	0	5.79411e-19	0	0.00987397	0.00955153	0.0597157	0.0431721	0.00622276	0.0318611	0.0463698	0	0.0741606	1.35367e-18	0.00496548	0.00916799	0	0.301146	1.43039e-21	0.0425055	7.23034e-18	0	0.0541964	0.0671177	0.0383958	0.00242988	0.0809103	0.0658532	0.013905	0.00379207	0.000955258	5.02103e-20	0	0.00210915	0.0584505	0.00888115	0	0.103233	0	0.00939882	0.0011579	0.00167257	0	2.77746e-18
TCGA-36-1577	0.00537724	0.00151279	0.0798902	3.7212e-20	0.0932759	0.00372125	0	0	0	0	0.030791	0.0141187	0.00974322	4.84936e-18	0.00173067	0	0.013029	0.0557806	5.73729e-18	0	0.0212257	0	0.187037	0	0.0630724	0	0.00333412	0.0143184	0.0379399	0.0144823	0.00808766	0.0120532	0.00789909	0.00774197	0.00842443	0	0.00316486	4.39587e-18	0.0398276	0.0188269	7.82483e-19	0	2.914e-20	0.0103536	0.0125675	4.71725e-20	0.00401873	0	7.43115e-18
TCGA-23-1027	0.185658	3.96572e-19	0.196907	0.0194997	0.0316108	0	5.48623e-20	0	2.65027e-20	0.00661529	7.71758e-19	4.3914e-20	1.66766e-20	9.21032e-18	0.0433856	0.00230971	0.0076264	0.0330335	3.81418e-19	0.00180483	0	2.68903e-18	0.407558	4.62924e-19	0.0142198	0	6.4516e-21	0.00494795	0	0.0491822	0.00178974	0.0540262	0.0517821	0.0131645	0.00336029	1.49316e-19	0.0037551	0.00753169	0.0674473	2.56547e-21	0.00805437	0	0.21775	0.0133687	0.00163348	0	0	0	0
TCGA-29-1691	0.111432	0.000456363	0.118882	1.85853e-18	1.26845e-18	0.00136983	1.71537e-19	5.45506e-18	0	0	6.41904e-05	4.18594e-19	0	1.10545e-17	0.0138342	0.00654792	0.0134171	0.0561753	0	0.00296756	0	9.54799e-19	0.232958	0	0	2.38711e-19	0	0.136226	0.134196	0.0182792	0	0.0362021	0.0189567	0.0127987	0	0	0.00129616	0	0.0296993	4.41911e-19	0	0	0	0.00058369	0.00625965	0	0.00339238	0	0
TCGA-25-1318	0.168845	0	0.19491	0.00829358	0.0493672	7.231e-21	0	0	0.00905811	1.24055e-18	0	0	6.99148e-20	0	0.0239722	0.0716699	0.00388439	0.0166907	0	0.00262637	0.00812305	0.00710193	0.386495	0	0.0600384	0	0.00235173	0.0355562	0	0.0535629	0.00187066	0.0324244	0.0254871	0.0130704	0.0120913	0	0.000202993	0	0.00297453	0.0579242	0.00529733	3.219e-19	7.62267e-18	0.00168757	0.00686989	0	0.00148975	0	1.86942e-19
TCGA-04-1361	0.145806	0	0.0959453	0.0362012	0.0235774	4.86045e-19	9.64928e-19	0	6.66664e-21	0	0.00456027	0.0270435	0.0112701	0	0.00549905	0.0292131	0	0.0429748	2.20933e-18	0.000675073	0.00653725	0.000569584	0.317562	7.6505e-19	0.118862	0	0.00142776	0.0646169	0	0.0345651	0.00197087	0.0291501	0.0341015	0.0219497	0.00725404	0.001588	0.00429812	0	0.0287899	0.00773658	0	3.60835e-18	0.0993847	0.000740657	0.00296727	0.0002138	0.00184796	0	0
TCGA-04-1651	0.110466	0	0.0172243	0.0208786	0.00458656	8.45025e-21	0	0	3.96907e-19	0.00150968	4.25688e-19	1.35219e-19	8.46679e-19	0	0.000869865	0.00888214	0.0108781	0.045217	2.37949e-18	0.00523362	0	0.00262442	0.460879	0	0.0604235	2.86741e-18	0.000913597	0.0545662	0.0779356	0.0591885	0	0.0126967	0.015505	0.0091774	0.000359192	0	0.00355164	0	0.0177299	0.0288684	0	0	0	5.0311e-19	0	2.20785e-20	0.00213535	1.03137e-19	0
TCGA-13-0727	0.141286	0.00214618	0.167721	0.00445122	0.0975364	9.74655e-20	7.16287e-18	1.14803e-18	0.0318623	0	0	0	4.1786e-18	0	0.0404629	0.0497039	0	0.0213137	0	0.00361302	0	0	0.335285	1.17754e-18	0.0227227	0	0.00255261	0.101023	0.036527	0.0304648	0	0.0261004	0.0284565	0.00658757	0.00844657	0.000935547	0.000916827	0	0.0734277	0.0149909	1.73895e-18	2.47093e-18	0.103066	0.00307979	5.02939e-05	0	0.00348032	0	8.51449e-18
TCGA-20-1683	0.0773017	0.000512492	0.0774336	0.0465933	0.0713998	0.00347083	0	0	3.39161e-19	2.57488e-19	0.00348998	0.00987102	0	0	0.0177224	0.115799	0.00870426	0.0504183	0	0	0.00372437	7.50747e-20	0.0190046	0	0.0544944	0	0.00217248	0.00337598	3.73605e-18	0.000447987	5.33669e-19	3.11682e-19	0	0.0270463	0.0129177	7.84264e-20	0.00395514	3.17121e-18	0.00292469	0	5.2022e-18	2.39389e-18	0.0274838	1.18479e-18	0	0	0.00108659	2.2188e-19	0
TCGA-36-1581	0.30032	0	0.0895069	0.0821757	0.0380162	0.00619551	3.69456e-18	5.99978e-19	0.011743	0.036076	0.00501713	0.0277931	0.0291541	2.46904e-05	0.0325603	0.0192907	0.0283267	0.0251845	7.17903e-19	0.0103525	0.00172288	0.00860207	0.293946	0	0.0525178	2.57811e-18	0.00147756	0.00427093	0	0.0204335	0	0.0548015	0.0382409	0.0144511	0.0143906	0	0.000143894	0.00770369	0.000200499	7.17496e-19	0.0178951	2.64852e-18	0	0	0	0.00100986	0.000550545	0	0
TCGA-24-2281	0.321473	4.05409e-19	0.108402	0.0450885	0.0688859	0.000243098	0	0	0.0518609	0.033898	0.0119154	0.0168037	0.00904184	0	0.0484086	0.0173313	0.0161896	0.0246602	0	0.018171	7.68643e-19	0	0.321508	0	0.000172559	0	0.00101477	0.00348861	0.0610075	0.0345638	0	0.119001	0.0873834	0.0109721	0.00706736	4.07954e-21	0.00216181	6.69136e-19	0.0321366	0.03759	0.0124619	0	3.47556e-18	0.0037098	3.2761e-19	3.53174e-19	0.000225096	6.80881e-20	7.89244e-19
TCGA-13-0725	0.181598	0.00898165	0.2039	0.00113267	5.29269e-18	0	0	0	0	0.0181418	0	1.68572e-19	0	2.2172e-17	0.00511659	0.0830414	0	0.0626056	7.60842e-19	0.00507586	0.0196033	0	0.335783	6.18156e-19	0.0374414	3.50656e-18	2.76235e-19	0.13865	0.0151418	0.0262276	0.00983009	0.0788183	0.0575649	0.034939	1.41061e-18	0.000659817	0.00335987	2.73208e-18	0.0638799	1.80588e-19	0	0	0.189617	0.014491	1.63261e-19	7.60123e-19	0.00332795	0	1.01703e-17
TCGA-29-1694	0.125199	0.000245614	0.192439	0.00294208	0.00904109	4.91945e-20	8.36597e-19	0	0.0251325	0.0118151	0	2.10319e-19	6.41457e-19	2.81767e-18	0.0357495	0.0663512	0.0119773	0.0434623	1.4522e-19	0.00291261	0.0132217	0.00458841	0.50757	0	0.114954	0	0.000834609	0.0335553	0.00670945	0.0699154	0.00139939	0.0298604	0.0275677	0.00875861	0.0018158	0.00133884	0.0109183	0	0.0142754	0.0118368	0	1.19185e-20	0.112645	0.0058342	0	1.33542e-18	0.000788363	0	1.08285e-18
TCGA-24-2254	0.136566	0	0.272496	0.00500437	0.0792672	0	4.38719e-18	0	0.0432242	0	1.0206e-18	0.00465727	0.000329896	2.03348e-18	0.053185	0.0184893	0.0191562	0	0.00367133	0.00683998	0	0.00667664	0.244826	2.75394e-19	0.0664881	3.43737e-18	0.00348006	0.0370723	0.0624046	0.0184467	0.00411093	0.0278814	0.0289596	0.0152845	0.0085302	0.00107757	0	2.74493e-18	0.00918853	0.00475507	0.020212	2.71692e-18	1.29008e-19	4.56387e-20	2.80986e-20	0	0.00177276	0	7.41152e-18
TCGA-25-1633	0.226107	0.00480764	0.304798	0.0190779	0	0.00353572	0	0	0.000971404	0.0334556	0.000199844	0.0238425	0.0367364	0	0.0309206	0.0524298	0.00219333	0.0480205	1.45737e-18	0.0190242	0.0137511	0.00437609	0.296582	1.76473e-19	0.0919115	0	0	0.0745892	0.128853	0.0386934	0.000955133	0.0534144	0.047734	0.0136735	0.00611146	0.00524028	0.0090773	2.16895e-21	0	0.00633299	0.015008	0	0.176252	0	0.032666	0.000272995	0.00122893	0	0
TCGA-24-1470	0.260938	0	0.0763535	0.0944532	0.053422	0.00531997	0.0193699	3.41579e-19	0.0450203	0.000852867	3.36031e-23	0.0539648	0.0371022	0	0.0727901	0.00233995	0.0368887	0.011642	4.08995e-19	0.0246378	0.0398902	0.00218491	0.364198	6.37892e-19	0.00685189	1.07015e-18	0.001768	0.0308835	0.0871568	0.0282548	0.0125182	0.0438795	0.036843	0.0187067	0.0101271	0.00128909	0	0.00135713	0.00680132	0.00884666	0.0263762	2.40306e-18	0	0.0225131	2.16934e-19	0	0.000411923	5.77152e-19	1.66887e-18
TCGA-24-1435	0.245725	0.00427217	0.248831	0.0146737	0.00725421	0.00514042	0.000346418	0	0	0.026913	0.0036927	0.0127924	0.0139711	0	0.0534061	0.0240349	0.0041874	0.0526032	0.00201428	0.00713963	0.0123751	0.000265105	0.253483	3.33671e-19	0.017338	0	0	0.00117549	0.0142861	0.0132112	0.00420064	0.052852	0.0458024	0.0163125	0.00431137	0	0.00518485	0	0.0153285	0.0301669	0.0156713	9.05485e-20	0.292956	0.0078617	1.8859e-19	0	0.000963976	0	0
TCGA-24-1105	0.146705	0	0.159838	0.0633775	0.00878166	0.000649242	1.46111e-18	0	0.0270063	4.92732e-18	0.00781246	0.0171509	0.00568423	8.79929e-19	0.0174384	0.0698753	0.0209554	0.0365761	2.80863e-18	0.00584367	0.00987715	0.000785796	0.390508	0	0.0831339	3.96877e-18	0.000869909	0.0126088	0.0462859	0.0444417	0.00292318	0.0321363	0.0232208	0.0143186	0.0114546	0.00128131	0	0.00270293	0.0244314	0.0604709	0.00112945	6.11643e-19	0.0467479	0.00410954	0.00999972	0.000392459	0.00147578	0	3.38972e-19
TCGA-13-0804	0.217805	0	0.0436486	0.04216	0.0648747	3.40336e-20	0	0	0.00128621	0.00874307	0.00692562	0	0.0183631	1.36478e-18	0.0298162	0.00108642	0	0.059225	7.52426e-19	0.00426795	0.0119329	0	0.399065	2.02845e-18	0	0	0.00160329	0.0256637	0	0.037903	0.0024686	0.086099	0.051931	0.0358706	0.00332376	2.13371e-19	0.00165819	0.00384783	0.0451127	0.00439014	0.0272679	4.27571e-19	0.0571141	0.0147021	1.03808e-20	2.10463e-19	0.000745787	6.55638e-20	2.17642e-18
TCGA-24-1103	0.00672473	0	0.0372778	7.01613e-19	0.00490187	0.00271774	0	4.76154e-18	0	5.63818e-20	1.61381e-19	0	0.0191422	0	0.00649323	0.00652636	0	0.0526849	3.48143e-18	0	0.0109589	0.0024987	0.384139	3.51792e-19	0	0	0.000645105	0.0689958	0.0129613	0.0370776	0.00201971	0.00661835	0.00345944	2.36404e-20	2.46036e-21	0.00218944	0.00124853	1.27545e-18	0.0633943	1.55733e-18	1.97273e-19	1.22873e-17	0.0365375	0.00844136	0.00991769	0	0.00157039	1.00874e-18	1.13382e-17
TCGA-10-0937	0.215342	0.00236296	0.0752429	0.00612073	0.0882849	0.00139142	2.90684e-19	7.09661e-19	0	0.000313868	0.00727223	2.03696e-18	0.0164168	1.8728e-18	0.0166548	0.0140212	8.57314e-19	0.0989497	8.93158e-18	0	0	0	0.42728	2.02428e-18	0.0454985	0	0	0.0324396	1.39182e-17	0.0554333	0	0.060254	0.0564609	0.0069566	0	1.7246e-20	0.00104092	1.14204e-18	0.0539516	0.0175834	9.31726e-18	0	0.0532221	0.00035852	0.00196923	0	0.000564331	1.59682e-18	0
TCGA-23-2078	0.235077	0.025556	0.185678	0.0589007	0.0108529	0.00391428	0.03592	0	0.0340003	0	0.00639037	0.031799	0.021399	0.00757717	0.0252017	0.019543	0.0285512	0.0325781	0	0.00518026	0.0202519	0.00678843	0.33634	1.51561e-20	0.103936	0	0	0.00310048	0.0223496	0.0250419	0.00456506	0.0184757	0.0235486	0.00945372	0.00388414	0.00163868	0.000127426	0.00731879	0.00614084	0.0355072	0.0135633	3.79658e-19	0.266098	0.007123	0.0092726	0.00720176	0.000635117	3.84331e-19	0
[truncated: 20 more columns]

## Sheet: immune_infiltration_GSE30161
	aDC	Adipocytes	Astrocytes	B-cells	Basophils	CD4+ memory T-cells	CD4+ naive T-cells	CD4+ T-cells	CD4+ Tcm	CD4+ Tem	CD8+ naive T-cells	CD8+ T-cells	CD8+ Tcm	CD8+ Tem	cDC	Chondrocytes	Class-switched memory B-cells	CLP	CMP	DC	Endothelial cells	Eosinophils	Epithelial cells	Erythrocytes	Fibroblasts	GMP	Hepatocytes	HSC	iDC	Keratinocytes	ly Endothelial cells	Macrophages	Macrophages M1	Macrophages M2	Mast cells	Megakaryocytes	Melanocytes	Memory B-cells	MEP	Mesangial cells	Monocytes	MPP	MSC	mv Endothelial cells	Myocytes	naive B-cells	Neurons	Neutrophils	NK cells
GSM746861	6.1814e-18	0	5.39675e-18	0	0.0720677	0.0127323	5.57442e-18	0	4.24163e-18	9.60469e-19	0.0110724	0	0	3.09122e-18	1.95084e-21	0	0.00753337	0.13386	1.10987e-17	2.85995e-19	0.00295322	0	0.00414067	1.52468e-18	6.55284e-18	0	0	0.0510867	0	0	0.000158299	2.31651e-18	5.35361e-19	1.10987e-19	0	0	1.39856e-17	0	0	1.61706e-18	0	0	4.23174e-17	0	0	9.9738e-19	0.000137037	0	0
GSM746862	1.57533e-18	3.73085e-19	0	0	0.110032	0.00917142	0	4.64587e-18	0.00566837	2.19501e-19	1.91928e-19	4.66167e-19	2.61462e-18	3.27368e-18	0	0	0.00701141	0.0592943	0	2.7193e-19	1.56604e-18	4.55218e-19	0.00174115	1.81773e-18	1.06379e-17	0	0	0.0302625	0.00903642	0	4.57342e-19	0	0	0.00251161	0.00214393	0	0	3.63483e-19	0	0	2.22838e-18	8.82578e-18	4.44445e-17	0.000812947	9.1923e-19	0	0.000137417	3.43638e-19	0
GSM746863	1.04269e-19	4.97253e-18	0	6.91434e-19	0.0726898	0.00447691	0	5.30219e-18	6.53708e-20	1.19504e-18	0.00616873	2.07135e-18	1.53342e-18	1.4596e-17	0	0	0	0.0966296	4.57653e-18	0	0	0	0.0202626	2.0739e-18	0	0	0	0.122299	0.00239543	3.21827e-20	3.28634e-19	0	1.83715e-18	2.71051e-20	0	5.01961e-19	8.36703e-18	0	0	0	0	2.16065e-18	1.40908e-17	0	2.65648e-18	0	6.20514e-05	0	0
GSM746864	0	7.91e-19	2.4746e-18	0	0.0529951	0.00338968	4.28997e-18	1.9364e-19	0.00722852	0	0.0278807	3.96787e-20	8.46938e-18	7.13728e-18	0.00165233	2.76467e-19	1.81851e-18	0.14499	1.36693e-18	0	1.68788e-18	5.73637e-19	0.0155906	4.46309e-18	0	0	6.41134e-18	0.131801	0.00765103	9.10816e-20	9.16111e-19	0	0	0	5.81814e-19	0	5.50608e-19	8.3302e-18	7.03736e-18	0	7.33505e-18	0	0	0	8.44323e-19	1.80343e-18	0.000768426	8.66445e-19	1.20191e-17
GSM746866	4.0827e-18	8.37749e-19	1.71925e-17	0.0140453	0.469383	1.07255e-18	3.14171e-17	6.70466e-18	0.00365025	2.22483e-18	0	1.04001e-17	0	0	0	5.08073e-17	0.0280912	0	3.69638e-18	7.02916e-19	0.00652479	0	0.0138181	0	3.64572e-18	0	0.0027916	1.83993e-19	0.102099	0	0.00693148	5.67471e-18	0	0.000300514	0.00274074	0.00786311	0.00989145	0.00740339	3.17567e-18	0.00091424	0	0	0.379304	0.0171164	0.0119099	4.40067e-18	0.00580102	1.17173e-18	0
GSM746867	2.31353e-18	8.64349e-19	0	0	0.104759	0	6.87567e-18	4.25811e-18	0	6.99669e-18	1.09228e-20	2.28257e-18	1.50612e-18	1.66893e-17	1.66119e-19	0	0.0220982	0.0192553	5.91285e-19	0	0.0062673	0	0.00245094	0	1.06914e-17	2.6544e-18	9.25371e-18	0.120418	0.0260997	5.03476e-20	2.97621e-19	0	0	0.000703413	0	0	0	6.54984e-18	0.00248218	5.73682e-18	1.81792e-17	2.58497e-17	0.0435247	0.0113442	2.1722e-20	4.31261e-19	0.001233	0	3.43206e-17
GSM746868	0	0	1.20182e-18	0	0.0567595	0.0210013	3.59109e-19	3.49062e-19	1.65685e-20	1.99705e-18	0.00791082	4.90564e-19	0	5.35401e-19	1.143e-18	2.88492e-19	7.73737e-19	0.134875	0	0	0	2.67302e-18	0.0093777	3.81514e-18	8.54607e-18	0	0	0.0286099	0.00332822	1.95667e-19	0	6.97979e-20	0	4.05374e-05	0	1.45805e-19	0	0	2.3635e-18	1.06726e-18	0	0	5.49788e-17	0	4.01427e-19	1.54616e-18	0.000239779	1.01139e-18	0
GSM746869	0.00533384	7.69493e-19	2.01892e-18	1.20229e-19	0.139893	0.00127044	4.18246e-20	0	0	4.2777e-20	0.00387599	1.0559e-18	7.94327e-18	0	0.000723746	0	0.00095447	0.10145	0	0	2.61899e-18	8.68577e-19	0.0306997	4.23663e-19	0	0	0	0.0482782	0.0160975	0	3.5915e-19	0.000555094	0.000804624	0.00311394	2.83283e-19	0	0	0	0	0	8.87457e-18	1.28926e-17	1.4982e-17	0	0	0	0.000124579	0	4.38201e-17
GSM746871	2.9429e-19	4.15284e-19	0	0.00781498	0.254796	0	0	7.05678e-19	0.0100385	0.00461799	6.58773e-18	0	1.56517e-19	0	0	0	0.0405438	0.000746868	0.00746427	4.14734e-20	5.29438e-06	0	0.00622403	0	2.42243e-17	0	0.00114934	0.132719	0.0487596	4.0627e-18	0.00229505	0	6.57207e-19	0.00467017	0.00692697	1.05109e-18	0.00533233	0.00641765	0.0125294	1.28077e-18	1.18293e-17	5.11506e-19	0.312012	0.0147305	0.026793	2.44754e-18	0.00523716	2.64527e-19	6.01674e-17
GSM746872	2.72283e-18	1.72101e-18	0	0.00153486	0.169952	2.33805e-20	1.57534e-17	1.70263e-17	0.0224209	1.93764e-18	1.4777e-19	0	0	2.57527e-17	0	0	0.0194259	0.0932676	0	0	0	0	0.00352592	0	5.20387e-18	1.77867e-18	0	1.63107e-18	0.0375228	9.09234e-19	0.00208977	1.08548e-18	0	0.0047424	0.00679051	6.25846e-05	0.00374163	0.00258356	0	0	1.49976e-17	3.42833e-18	0.156717	0.00376811	0	0	0.0015409	1.97218e-18	2.20696e-17
GSM746873	0.0388358	0	0	0	0.0706247	0.00847986	0	0	0	3.0477e-19	0.00861479	2.16768e-19	0.00496814	1.05399e-17	0	0	0.00286982	0.113632	0	0	0	2.41178e-18	0.0237338	0	1.11416e-17	1.74653e-19	0	0.0643853	9.42722e-19	1.52331e-22	6.36313e-20	0.0160545	0.00178497	0.0182689	0	0	1.6068e-19	0	0	3.20772e-18	3.67112e-17	6.65732e-18	4.38986e-17	5.42287e-19	5.87196e-19	0	0	5.49367e-19	6.15648e-18
GSM746875	0.0432601	0	0	0.0141749	0.277456	0	7.94005e-18	3.56583e-18	0.000788972	0	6.66511e-18	1.67348e-17	0	3.89603e-17	1.87212e-19	5.45388e-17	0.0291847	0.00557953	0	0	0	3.24231e-18	0.0237171	2.81837e-18	0	8.97228e-18	0.00137274	0.0197458	0.0402534	0	0.0026155	0	9.98787e-20	0	0.00908461	4.56849e-19	0.00233945	0.00448665	0	0.00900355	0	0	0.157373	0.00291589	0.0215765	0	0.00237253	0	0
GSM746876	1.36629e-18	1.33012e-18	0	3.90636e-18	0.185995	3.25609e-18	3.36022e-18	1.1114e-17	2.99238e-18	5.08546e-18	0	3.01113e-18	4.23274e-17	0	6.70282e-22	2.44703e-17	0.0134873	0.0500029	0	0	1.15391e-19	1.94627e-18	0.0314869	0	0	0	4.00183e-19	0.0586716	0.0328438	2.03521e-18	0.000478184	0	0	0.00688037	0.00339324	0	0.00323664	0	2.01892e-18	0.00727713	5.76808e-18	0	0.137661	0.008293	0.00294392	0	0.00260982	0	1.43423e-19
GSM746877	0	1.01525e-18	6.92653e-18	0	0.124643	0	1.63565e-18	0	5.37804e-19	1.23432e-18	0.00235979	0	2.42087e-18	7.32601e-19	4.28529e-19	0	0.00752636	0.0314932	0	0	0.000347242	0	0	7.98641e-19	0	0	0	0.0207676	0.019823	0	0	2.40005e-18	1.64392e-18	0	0	0	0	0	2.24476e-19	0.00106229	7.22639e-18	0	0	0.00253581	1.10052e-18	0	0.00112797	1.16769e-18	0
GSM746878	0	6.18422e-19	0	0.00950901	0.2468	0	0	0	0.0101345	0	3.68434e-19	5.73576e-18	3.27256e-17	0	7.09765e-19	0	0.0441937	0.0538607	4.00009e-18	2.7767e-18	0.00265629	9.03955e-18	0.019978	1.13692e-18	2.89848e-18	6.06816e-18	0	0	0.0411757	0	0.00335323	0	1.73569e-18	3.04959e-20	0.00736991	0	0.00247066	3.95284e-19	0.00433241	0	0	1.47834e-18	0.20738	0.00935011	0.0014816	3.36934e-18	0.00465743	0	9.99385e-17
GSM746879	0	1.96045e-18	2.20005e-17	0.0482023	0.160354	0	4.15322e-18	1.10635e-17	0.0199112	0	2.19194e-18	0	1.07972e-17	0	0.000107092	0	0.0165251	0	0.00993511	2.27431e-19	0.00720152	0	0.0151994	0	0	1.52491e-18	0	0	0.0564917	6.34347e-19	0.0116096	0	0	7.13808e-20	0.00297401	0	0.00420029	0.0493538	0	0.00222156	0	0	0.290762	0.0135474	0.0262869	2.29207e-18	0.00813844	0.00112652	0
GSM746880	0	1.46731e-18	0	1.03149e-19	0.176461	0	6.42762e-18	3.4229e-18	0.0342433	0.00868212	5.55908e-19	8.58036e-18	5.25184e-18	0	4.44729e-19	0	0.00792698	0.0865452	0	6.88281e-19	0.00850937	0	0.0271417	3.39145e-18	0	0	0	0.0729072	0.0245856	2.32806e-18	0.0004541	1.09122e-18	2.73127e-18	0.00193564	3.33669e-20	5.14155e-19	0.00548438	7.89059e-19	0	0	3.91703e-18	1.18826e-17	0.0462869	0.00633468	0	2.63789e-18	0.000837304	3.88459e-18	7.17561e-17
GSM746882	0	0	0	0.0249788	0.331204	0	2.91174e-18	3.42112e-18	0.0104735	1.89313e-17	0	0	2.08386e-17	9.25632e-18	0.0630409	0	0.00970786	5.95572e-18	0	0.00610818	0.0185315	0	0.0309882	3.14267e-18	9.20384e-18	0	0.00239218	0	0.119284	0	0.0117529	1.36795e-18	4.01319e-18	0.00383977	0.00217249	1.55654e-19	0.00388465	0.0233691	6.85386e-18	0	2.08338e-17	9.2029e-19	0.395367	0.0210062	0.0200925	5.62643e-20	0.00901263	0	0
GSM746884	6.98917e-19	0	1.08246e-17	0	0.0141137	0.0106843	2.5749e-19	0	1.25193e-19	4.6563e-19	0.00658361	1.83234e-18	0	7.57803e-18	5.51952e-21	0	0	0.108005	2.35911e-18	0	5.10598e-19	0	0.0125085	0	0	2.49387e-17	7.42653e-18	0.144524	0.000613185	0	5.0378e-19	1.1868e-19	2.27683e-20	0.00087986	0	0	0	1.07003e-17	0	0	1.43902e-17	0	1.60223e-17	0	0	1.66363e-18	0.000471107	0.00161171	8.70365e-18
GSM746885	0	4.52644e-19	7.7271e-18	0.0372588	0.174349	3.82512e-18	0	1.03812e-17	0.0402234	0.0825075	4.68968e-18	4.26546e-18	2.55828e-17	6.5757e-18	0.0143969	0	0.0405791	2.28148e-19	0.0350751	0.00747235	0.0122225	0.0129261	0.0127541	7.08953e-19	0	4.99865e-18	0	0.0295805	0.123446	5.75373e-19	0.0133461	2.61446e-18	0	0	0.00208685	0.00800379	0.00416036	0.00748963	5.03537e-18	0	1.23498e-18	6.11578e-20	0.311301	0.0145963	0.0377721	1.88364e-18	0.0095675	0	3.90959e-17
GSM746886	5.07891e-19	0	9.18142e-18	3.6213e-18	0.10981	0.00850933	0	1.79788e-18	7.54679e-20	6.24082e-18	0	2.53643e-18	0	8.87307e-18	0.00338025	1.00573e-18	9.99065e-19	0.138498	0	1.66278e-19	0	2.99605e-18	0.00590826	0	0	6.75831e-19	0	0.121574	0.0161112	0	0	0	0	0.00442209	0	1.2458e-18	1.96724e-17	1.00948e-17	0	0	1.50905e-17	0	0	0	0	8.1774e-19	0.000713493	0	2.61361e-17
GSM746887	0.0312436	0	1.29095e-17	0.0255641	0.121815	0.0119734	0	0	0.0163796	0.0072692	0	0	1.43084e-18	1.90144e-17	0	0	0	0.109308	5.32829e-18	0	0	0	0.00714019	0	5.43625e-18	0	0	0.0246848	0.00331958	1.00016e-19	1.53211e-20	0.0135899	0.00954189	0.000597235	0.00143659	3.81676e-19	6.16344e-18	0.0074893	0	0	9.5503e-18	7.36059e-18	1.39407e-17	0	0	1.15987e-19	0	1.99136e-18	2.6607e-17
GSM746889	6.28478e-20	5.29929e-18	3.4686e-18	2.47573e-18	0.144558	3.10392e-05	8.8023e-19	1.93309e-17	0	0	0.0230564	0	0	0	5.16386e-19	5.46476e-18	2.7617e-18	0.116271	0	0	0	6.86211e-18	0	3.06545e-18	2.6167e-17	0	1.75521e-18	0.112387	0.0346952	8.58724e-19	0	1.96624e-21	0.00360309	0.00439683	0	0	9.36686e-18	1.58764e-17	0	1.50518e-19	1.81017e-17	2.35067e-17	1.3336e-17	9.25361e-19	1.66935e-18	4.71202e-18	0.000701822	1.12151e-18	9.98779e-17
GSM746890	0	1.69139e-18	3.26859e-18	1.03618e-18	0.0116798	0.0157332	0	5.10188e-19	0.00256548	0	0.0150032	0.0104865	0	0	0	0	0.00423894	0.163578	0	1.12083e-19	0	1.54563e-18	0.000304608	0	8.29617e-18	0	0	0.0789409	0.00339399	9.93033e-20	1.05604e-20	0	8.39714e-19	0.000321131	0.00347309	0.000410411	8.01844e-18	2.4865e-18	5.12389e-18	0	6.92929e-19	0	0	0	0	6.3529e-19	0.000192576	1.10381e-19	3.42677e-18
GSM746891	2.60407e-19	2.70884e-18	0	2.85488e-19	0.0398084	0.0097312	0	2.13697e-18	0.00949867	0.00205519	0.0258529	0	0	6.22018e-18	2.81338e-19	0	0	0.0997074	2.88166e-19	6.19583e-19	0	0	0.0104821	1.52184e-18	1.3627e-17	0	2.01804e-17	0.102714	0.000851088	2.37714e-19	4.19987e-20	3.15471e-19	3.85979e-20	0	0	0	4.95122e-18	0	0	0	0	2.64159e-17	2.71882e-17	2.12827e-18	0	4.18168e-19	0.000426551	0	0
GSM746892	3.715e-19	0	0	2.03697e-18	0.0983498	0.00407609	0	1.48718e-17	0	2.73011e-17	0.0237122	1.98881e-20	5.3317e-18	1.4705e-17	0	0	0	0.13664	1.52091e-17	0	2.23021e-19	0	0.00644661	0	7.71621e-18	0	0	0.0609727	0	0	0	2.3466e-18	8.83875e-19	1.8055e-20	0.00245381	1.49709e-19	0	1.79087e-18	0	0	1.19037e-17	1.73074e-17	0	0	8.10298e-19	0	0.000144449	1.68115e-19	3.12403e-17
GSM746893	0	0	1.56049e-17	0.00385982	0.137149	0.00123151	0	1.1423e-17	0.0124743	0	1.55956e-19	2.83877e-18	0	1.20636e-17	0.00637865	3.73534e-17	0.0282195	0.0254604	1.1861e-18	4.78772e-19	0.00205091	1.27282e-19	0.0172657	1.75315e-18	0	2.51768e-17	1.87642e-18	0.0266017	0.0305969	0	0	0.00510884	0	0.0164637	0.0031085	2.26072e-20	0.00170052	0.00229723	8.81049e-19	1.22662e-18	9.91357e-18	1.08439e-17	0.057234	0.00931111	0	1.96185e-18	0.00264879	2.64272e-19	4.63693e-17
GSM746895	1.1583e-18	0	8.24858e-18	0	0.0640356	0.0132322	1.61004e-18	0	0	0	0.0150677	0	0	1.71757e-18	0	0	0.00537951	0.203924	7.57616e-18	8.40693e-19	0	2.85092e-18	0.00294046	7.87302e-18	2.31178e-17	0	0	0.0946609	2.10929e-21	0	6.80028e-19	0	6.50986e-19	2.02244e-21	1.2449e-18	4.72985e-17	1.35354e-18	0	0	6.12404e-18	1.56224e-17	1.35593e-18	3.46476e-17	0	1.9696e-19	4.81532e-18	0	1.32461e-18	0
GSM746897	1.62888e-18	0	0	0.0372666	0.321532	0	2.9825e-17	1.81828e-17	0.0436259	0.0598801	0	0	2.24129e-18	9.47236e-18	0.0288271	6.18576e-18	0.057436	0	0.00610672	4.99819e-20	0.0126312	0.00305649	0.0274158	2.82864e-18	0	0	5.53368e-20	4.57201e-20	0.146328	0	0.00159259	1.8312e-18	1.89263e-18	0	0.0102794	0	0.0117206	0	0	0	0	0	0.41844	0.021082	0.0155953	4.50106e-18	0.0079825	0	5.17495e-17
GSM746898	0	0	0	0.00179115	0.18343	6.45323e-19	0	2.71587e-18	0.0258759	0.00129013	9.79373e-19	7.39381e-18	5.86162e-18	6.0723e-18	0	0	0.018388	0.0959819	0	2.77773e-20	0.00457671	0	0.0165933	0	2.83353e-17	0	3.67197e-18	0.0492698	0.0761096	0	0	3.89042e-18	0	0.00687136	0	4.4049e-19	0	0.0025209	4.54982e-18	0.00707331	0	1.49575e-17	7.05831e-18	0.00678908	0.00571693	0	0.00144119	4.54742e-19	1.23254e-19
GSM746899	0.0722074	0	1.21061e-17	0	0.0799225	0.0266451	0	0	1.4129e-18	7.77777e-18	0.0145593	0	2.29078e-18	0	0	0	0	0.129866	0	7.51827e-22	1.49227e-18	1.64195e-18	0.00974747	5.65841e-18	2.79803e-17	3.36056e-17	0	0.0280568	0.0292477	1.39965e-19	5.36983e-20	0.0259583	0.0181856	0.0037176	3.07408e-19	0	0	0	7.36249e-18	2.27058e-17	0	1.08184e-17	2.63972e-17	6.18298e-19	2.1061e-18	2.02176e-19	0	0	0
GSM746900	2.37054e-18	8.36535e-18	0	3.48383e-20	0.124683	0.00326886	3.31217e-18	1.20734e-18	0	4.99706e-18	3.30138e-19	0	3.39626e-18	9.60413e-18	2.96909e-18	1.03293e-17	0.00274983	0.101073	3.23212e-18	0	0	4.21421e-18	0.010698	2.26901e-18	7.45157e-18	0	0	0.0162502	0.00720781	3.73874e-19	0.00104501	0	3.7592e-19	0.0068046	8.1909e-15	0	0	2.44049e-18	3.22586e-18	0	0	0	4.93963e-17	0	0	7.38339e-19	0.00110436	0	3.78055e-17
GSM746902	0	2.03976e-18	0	2.0597e-18	0.0171287	0.0135814	1.69324e-18	0	7.34978e-19	0	0.0234959	3.99346e-20	2.30119e-18	6.15448e-19	4.60869e-05	0	1.00638e-18	0.149208	8.70422e-18	0	3.86706e-18	1.07114e-18	0.011711	0	0	4.86638e-18	1.68036e-18	0.0848543	6.12002e-21	0	1.89528e-19	0	0	0.000122711	0	6.83516e-20	0	2.8099e-18	0	0	0	6.84416e-18	1.08898e-17	4.43725e-19	0	2.54729e-18	0.00033652	0	7.08747e-19
GSM746903	0.0681801	1.69739e-18	0	0.0417753	0.348618	0	0	7.97055e-18	0.0520616	0.0772986	0	0	4.34629e-17	7.96018e-18	0.149041	6.069e-18	0.0991245	0.0125146	0.015895	0.0356606	1.43844e-18	0.000662289	0.004762	3.4932e-19	2.43947e-17	0	0.00159604	0	0.193699	2.76254e-18	0.0127757	0	6.97591e-20	0.00369296	0.0168898	0	0.00973221	0.0016714	0.00449151	0.0448153	0	0	0.423956	0.00917125	0.0203234	0	0.0179211	4.65129e-20	0
GSM746904	8.17904e-19	2.62905e-18	7.32909e-18	5.39923e-22	0.189449	2.51834e-19	3.50372e-18	1.52413e-17	0.0226326	6.03518e-20	0	0	7.61016e-18	0	0	2.99238e-17	0.00794497	0.034908	8.23997e-19	1.22722e-18	0.00649163	0	0.0129393	1.69147e-18	0	0	7.56427e-20	0.0506712	0.026988	0	0.00191407	1.23701e-18	5.97326e-18	0.00470308	0.00849077	2.24092e-19	0.00705652	0	5.08858e-18	0.00253579	0	0	0.00351623	0.00517212	0.000372403	0	0.00251246	0	5.4522e-17
GSM746905	0.0309119	0	4.69652e-18	0.0185632	0.508474	0	0	4.75202e-17	0.0331761	0	0	8.97821e-18	0	5.56563e-17	0.150948	5.25832e-17	0.0425689	7.78043e-19	0.0250932	0.0478463	0	0	1.68074e-18	0	2.00996e-17	1.41531e-17	0.00786937	3.0391e-18	0.211748	0	0.00498537	4.39488e-18	0	0.00505932	0.016769	0.011225	0.00874336	0.0225784	7.73645e-18	0	0	2.23386e-17	0.477743	0.0176875	0.0855347	0	0.0154378	1.96953e-18	3.15379e-17
GSM746906	1.70228e-18	1.70403e-18	1.69414e-18	0.000728198	0.0754343	0.00948573	0	0	0.00585556	1.86951e-18	0.0205332	5.30349e-19	0	1.17053e-17	7.53775e-19	0	4.70173e-19	0.118028	0	2.46217e-18	1.18634e-19	8.87553e-19	0.0321751	1.04039e-18	8.32585e-18	0	0	0.06245	0.00175689	2.04445e-19	5.12075e-19	0	2.63994e-18	1.60781e-20	0	0	0	7.56813e-19	0	5.05442e-18	0	6.44469e-18	5.65495e-17	0	3.83076e-18	0	0.000160947	6.70607e-19	0
GSM746907	1.19059e-18	0	0	0.00782917	0.030515	0.0100081	0	0	0.0231935	0.0170215	0.0167078	0.0149947	3.80956e-19	0	7.29599e-20	2.17237e-18	0.00616555	0.109751	3.80838e-18	0	3.23155e-19	0	0.0174076	3.15913e-18	4.5336e-18	1.18014e-19	0	0.0128327	0.00968542	7.62187e-21	0	0.000271898	0	0.00175896	0	1.2397e-19	4.74967e-18	8.34651e-20	5.36371e-18	1.53232e-18	0	1.34622e-18	0	0	0	0	0.000467743	0	1.19925e-17
GSM746908	0	6.14336e-19	1.98673e-17	0	0.0706537	0.0209319	0	0	0	3.94171e-18	0.0020306	8.20667e-18	1.16372e-17	0	0	0	0.00013856	0.139536	3.16267e-18	0	2.40367e-18	0	0.017693	5.73934e-19	1.61448e-17	5.26539e-17	0	0.0741872	1.21902e-20	5.54983e-19	3.5985e-19	5.71041e-19	0	0	0	1.45881e-19	4.95212e-19	0	8.35458e-18	0	1.37257e-17	8.51678e-18	3.48625e-17	0	3.98845e-18	5.29246e-19	0	0	0
GSM746910	3.09076e-18	0.00180685	8.67691e-18	0	0.354261	4.98784e-18	0	0	0	1.11395e-17	2.69943e-18	8.17162e-19	9.84007e-18	0	0.0248542	3.01867e-18	0.0554798	0	2.25464e-20	0	0.0220069	0	0.00545176	0	0	0	0.00727857	0.0827951	0.0733207	0	0.00402168	1.56683e-18	0	0.0120075	0.00667092	0.00220015	0.00448847	0	7.93625e-18	0.00460705	1.9112e-17	0	0.269286	0.0265382	0.0290936	4.39065e-18	0.0100361	0.00334531	0
GSM746911	2.77614e-19	0	0	0	0.0794695	0.00624486	0	2.3876e-18	0	6.07734e-18	0.00860818	0	4.72012e-18	1.19016e-17	2.64051e-20	0	0.00148271	0.0842259	0	2.24123e-18	0	0	0.0177709	0	0	0	3.05966e-18	0.0816603	0.00389866	3.38225e-19	0	0	2.34821e-19	9.87097e-20	9.59959e-19	1.76362e-19	6.53662e-19	0	0	0	1.33805e-17	0	2.60048e-17	1.2567e-19	1.37839e-18	0	0.000291997	3.46833e-19	9.3389e-18
GSM746912	0	0	0	0	0.0657027	0.0113482	2.06518e-18	4.52059e-19	0.0207344	0.017987	2.03733e-19	0	2.4735e-18	4.81604e-18	0.00586885	0	0.00652816	0.0543828	2.8248e-18	7.88452e-20	6.53336e-20	0	0.00272379	0	0	0	0	0.0961866	0.0425329	0	0	5.7562e-19	4.10691e-18	0.0010159	0	3.69586e-20	0	0	1.92403e-18	2.40318e-18	0	2.24727e-17	4.57045e-18	0.00252987	1.44672e-18	0	0.00230434	3.16305e-19	0
GSM746913	0.052924	2.64864e-19	5.71372e-17	0.0171196	0.0365373	0.0457605	1.37891e-18	0	0.014495	0.0446909	0.0415085	0.0212563	0.00254653	0	0.0369433	0	0.00784326	0.334349	0	0.00107392	0	1.3031e-18	0.0134507	0	0	1.03215e-17	8.8052e-18	0.0528095	1.78965e-18	0	3.60156e-05	0.0155878	0.00221776	0.00880389	8.85679e-20	0	4.49179e-18	0.0116519	0	0	0	1.31281e-17	0	9.4624e-20	0	0	0.000259727	0	0
GSM746914	2.60625e-18	0	0	0	4.69232e-19	0.031049	1.56458e-18	0	2.69566e-19	0	0.0439745	1.35976e-18	0	0	0.00362679	0	0	0.177893	9.72683e-18	2.26763e-18	3.14363e-18	4.82164e-18	0.00810689	0	0	0	0	0.0659897	0	0	9.83246e-19	0	0	0	0	0.000302543	8.41565e-18	1.71636e-18	2.84419e-19	0	0	1.27997e-17	5.37346e-17	5.03229e-18	4.63862e-18	1.74853e-19	1.79504e-05	0	0
GSM746915	3.73659e-18	0	0	0	0	0.0121649	0	0	0.0109758	2.15257e-18	0.0274087	0.00438915	4.61801e-18	1.11789e-18	0.00358896	0	0.00987322	0.124846	5.91392e-18	0	1.36965e-18	0.0022128	0.0307033	1.47065e-18	1.91031e-17	4.89714e-18	2.9921e-19	0.0534348	0.0168597	0.00083602	1.60873e-19	0	1.41255e-18	0.00682491	0	0	6.27899e-18	6.47189e-20	8.57431e-18	1.23095e-17	0	0	3.48426e-17	1.155e-19	1.36282e-18	1.06254e-18	0.0012202	2.1554e-19	1.05371e-18
GSM746916	0	0	7.00535e-18	2.29727e-19	0.0243942	0.0260608	0	1.73126e-18	1.93007e-18	1.07844e-18	0.0247227	0	4.36751e-19	0	0.000468421	0	0	0.199242	3.2151e-18	0	0	0	0.0116472	7.47981e-18	2.4463e-17	1.1833e-17	0	0.0620707	0	0	1.63504e-18	0	4.26154e-20	0	0	0	0	0	2.08445e-18	0	0	0	3.72134e-17	0	1.0815e-18	1.07912e-18	0	0	0
GSM746918	0	1.58667e-19	1.41112e-17	0	0.14984	1.19962e-18	7.96135e-18	6.71917e-18	0.0107085	8.10317e-18	0	0	0	7.58236e-18	0	0	0.000146712	0.0789388	0	7.06843e-13	0	0	0.0230139	0	2.88026e-18	0	6.95627e-18	0.0427407	0.0167137	0	0	8.85216e-20	4.49374e-19	0.00167862	0	2.26515e-15	0	8.55465e-18	3.88578e-18	8.11244e-18	0	0	1.57881e-17	0	2.0476e-20	0	0.000747562	0	6.93532e-17
[truncated: 20 more columns]

## Sheet: immune_infiltration_GSE32063
	aDC	Adipocytes	Astrocytes	B-cells	Basophils	CD4+ memory T-cells	CD4+ naive T-cells	CD4+ T-cells	CD4+ Tcm	CD4+ Tem	CD8+ naive T-cells	CD8+ T-cells	CD8+ Tcm	CD8+ Tem	cDC	Chondrocytes	Class-switched memory B-cells	CLP	CMP	DC	Endothelial cells	Eosinophils	Epithelial cells	Erythrocytes	Fibroblasts	GMP	Hepatocytes	HSC	iDC	Keratinocytes	ly Endothelial cells	Macrophages	Macrophages M1	Macrophages M2	Mast cells	Megakaryocytes	Melanocytes	Memory B-cells	MEP	Mesangial cells	Monocytes	MPP	MSC	mv Endothelial cells	Myocytes	naive B-cells	Neurons	Neutrophils	NK cells
GSM795125	0	1.50033e-18	0	0	0.0028243	1.511e-20	1.24204e-19	2.13753e-18	5.6541e-19	7.49945e-20	0	0	0.00145592	0	1.1866e-20	0	0	0	0	0	7.50516e-21	0	0.033369	5.42913e-19	9.6741e-19	0	1.10535e-18	0.0400033	0	0.00177162	1.32513e-19	0.00252192	0.00339503	0.00839444	0.00637245	0.00183137	0	1.67581e-18	0.0508058	0.0223548	4.17148e-19	7.40185e-18	0	0.00126288	0.00545149	0.00184833	0.000306692	6.58559e-20	1.03746e-18
GSM795126	0	3.86292e-19	0.0320568	1.83816e-18	0.0311761	4.91634e-20	1.99526e-18	1.95316e-18	0	0.00256327	0.004283	0	0.000574005	1.569e-18	0.00244059	0	4.08873e-18	0	4.33389e-18	0	0.000836711	2.42894e-18	0.00607696	0	0	0	0	0.0426482	0.0165146	0.000717263	0.00152785	0	0	0.000176595	0.00338217	0.00644185	3.84581e-18	8.54193e-19	0.056756	0.0213208	0	0	5.09437e-18	0	0.0086018	1.624e-19	0.000889856	0	4.78855e-20
GSM795127	0.00668811	0.000390667	0.0249616	0	0	0	0	1.54951e-20	0	0.025094	0.00098521	1.55773e-21	0.00880287	0.00438759	0.00830873	0.0200068	0.00139805	6.70104e-22	0	4.50896e-19	0.00120705	7.82181e-20	0.0203845	2.35858e-18	0.011563	0	0	0.055728	0.0286015	0.00247735	7.71163e-20	0.0328816	0.0230063	0.0150996	0.0138569	0.00554474	4.14126e-20	7.60221e-19	0.0800647	0.0128569	0.00641233	1.65501e-18	1.43289e-18	0.00394616	0.00190052	0	8.69664e-05	8.84872e-20	2.97554e-18
GSM795128	0.0396004	6.94622e-19	2.59086e-18	1.94704e-19	0.100501	3.51003e-19	6.10239e-18	6.31615e-19	3.40221e-19	3.32473e-18	0	2.9653e-18	0	2.63584e-19	0	0	0.000328109	6.40723e-19	0	0.000628604	0	0	0.052555	0	1.38693e-18	0	5.11909e-19	0.046735	0.104036	0.00642472	0	0.0214764	0.0201689	0.00683024	0	0.000597028	5.29127e-18	4.47771e-18	0.0415557	0.0205991	0.000298517	0	0	0	0.000488998	2.64389e-18	0.000274699	0	2.80299e-18
GSM795129	0.0723768	0	0.016958	0.0334726	0.0266015	0.00315466	0	0	3.46563e-18	0.0274726	0.00172946	0.0135191	0.0556254	0.00296541	1.89037e-20	0.00227433	0.00861564	0.0238552	0	0.000893635	0	0	0.0149594	1.39015e-18	0.0132402	5.18437e-18	2.21701e-20	0.0519747	0.00302627	6.07851e-23	0	0.0243089	0.0195831	0.00569271	0.00158063	0.00104788	0	0.00681083	0.0775545	0.0100722	0.00952754	0.00645905	0	2.39084e-19	0.001339	0.00895538	0	3.21463e-19	0
GSM795130	2.85923e-18	9.47133e-19	0	0	0	0	0	6.1e-18	0	0.0141195	0.00282878	0.000256905	0.00341453	3.67154e-18	0.0189554	0	0.0122445	0	1.19415e-18	0.000710065	3.21069e-19	0	0.0410505	0	2.67305e-18	1.03443e-18	0	0.142613	0.114303	0.000909717	0.000939361	1.9774e-19	1.16632e-18	0.000575268	1.86387e-18	0.00723368	4.68193e-05	0.0247788	0.0378163	0.00637	9.00941e-18	0	0.0332845	5.63876e-19	0.00184881	2.23195e-19	0.00299129	0	1.05214e-17
GSM795131	0.0770317	0.00041909	0	0.00622648	0.0548898	9.49168e-20	2.58951e-18	0	5.44827e-18	0.0279456	0.00810965	8.44024e-20	0.0175309	3.78698e-18	0.036689	0	0.00740827	0.00263979	0	0.00765771	0	0	0.0708333	1.86473e-18	0.0381207	0	0.000259174	0.0578449	0.134085	0.00708985	0	0.0384537	0.0250189	0.0237877	1.91793e-19	0.00265029	0.00132781	0.00515944	0.0578297	0.0169217	0	7.68949e-19	0.00443851	0	0	0.0014961	0.00103575	2.5623e-19	0
GSM795132	7.12242e-19	1.18963e-20	0.0393852	0.0113072	0.00874949	0	1.411e-18	0	6.70741e-19	0.00296647	0.0103794	0	0.00949791	0	0.0049432	0.0112233	0.00422131	3.40642e-20	1.85413e-20	4.15649e-20	2.02459e-20	0.00357025	0.0186539	0	7.72115e-19	1.90904e-19	0.000843671	0.050322	0.0110643	0.000223529	0	0.00115969	0	0.00601644	0.00137962	0.00570824	1.9466e-19	0.00311813	0.04304	0.0461944	1.38503e-18	0	2.7412e-18	0.00278388	0.00499486	0.000314899	0.00116656	0	1.2793e-18
GSM795133	0.00291159	0	0	0.0163584	0.023283	0	0	3.99898e-19	1.2336e-18	0	0.0157731	0.00119493	0.0165833	0.000645198	0.0064533	1.23102e-18	0.00408382	0.00855941	0	0.000182006	0	3.44657e-19	0.00819903	1.10588e-18	2.71153e-18	0	0	0.0655678	0.0299392	2.62405e-05	0	2.1112e-19	0	0.00824245	0.00103254	0.0037795	2.174e-18	0.00855266	0.0841109	0.00166876	6.00317e-18	1.75664e-18	0	0	0.00841611	0.00012663	0.00231117	1.21487e-19	0
GSM795134	0.00048281	0.00153625	1.00578e-18	0	0.0572456	0	0	0	1.99621e-18	0.00929222	0.00627829	1.40595e-19	0.0169001	0	0.0193362	9.21327e-19	0.00605924	0	0	0.00134612	2.28622e-19	0.00207023	0.0561579	4.30084e-19	0.055616	0	0.00139953	0.0590329	0.036986	0.0342848	0	0.0054324	0.000671651	0.00738404	0	0.00304982	0.00319038	6.80283e-21	0.0483135	0.0106676	1.95307e-18	0	0.0139521	0	0.00178871	0	0.000459867	0	3.89923e-18
GSM795135	0.0830672	3.70217e-19	0	0.0434805	0.016223	1.7168e-18	1.76066e-18	2.77099e-19	1.2457e-18	0.0505814	0.0232822	0.134028	0.170958	0.104528	0.0230394	0	0.00113425	0.00624475	0	0.00401326	0	0	0.0401893	3.32609e-19	0	6.90047e-18	1.42534e-19	0.052992	0.0321194	0.00156472	4.90198e-21	0.0144985	0.0119882	0.0163043	0.00844309	0.00711072	0.000786355	0.0169079	0.0527725	0.0158193	0.00917632	0	0	0.00109221	0.00495532	0	0.000278943	1.04369e-18	6.08499e-19
GSM795136	0.0264864	0.00499764	0	0.0210159	0.0139959	0	3.82958e-18	1.01407e-18	1.833e-18	0.0273241	0.00586764	4.15011e-19	0.00326263	0	0.0209983	0	0.00238431	0.00990727	0	2.93566e-20	0.000379856	0.00129854	7.36764e-05	0	0.00552909	0	0.00109078	0.0700635	0.0112121	0	4.3857e-19	0.018118	0.00474706	0.0227733	0.0101729	0.00200282	0.00104916	0.0131814	0.0654804	0.0119628	0.00035603	0.00389945	0.0175308	0.00185864	0.00569582	8.54255e-19	0.000264837	0	1.06865e-17
GSM795137	0.0282938	0.00161866	0.0419923	0	0.0172851	8.94589e-21	2.90011e-18	0	0	0.0101854	0.00112862	5.1583e-19	0.00219067	1.7709e-18	0.00695551	0.0179323	0	0.00151735	0	0.000751071	0.00681535	0.000986998	0.0323695	7.16878e-20	0.0439091	0	0.00123045	0.0931241	0.0417488	0.000413408	0.000735353	0.0151872	0.0233714	0.00458904	0	0.00715975	4.35055e-20	0	0.0669479	0.0234429	0.00097126	6.72257e-20	9.43334e-19	0.00650155	0.00295339	0	0.000100636	0.000172431	0
GSM795138	0	0	2.74739e-18	0	0.0325492	0	3.23486e-18	0	0	0	0.007629	2.47236e-18	0	5.76689e-18	0.00116238	0.0228787	0	3.12786e-19	0	4.93515e-19	0.00100505	0.00215707	0.000502857	9.12262e-19	6.52491e-18	0	0.00138932	0.102987	0.00292178	6.34416e-20	0	2.19132e-18	0	0.00190234	1.08635e-19	0.00464235	0	0	0.0541427	0.00775345	0	6.68313e-18	6.18195e-18	0.00547464	0.00860565	5.95712e-19	0.00334511	4.55353e-20	9.74903e-18
GSM795139	0	0.00179132	0	7.2932e-19	0.0634732	0	0	3.12334e-19	4.93278e-18	2.18311e-19	2.42971e-21	0	0	0	0.0035153	2.26178e-18	4.75981e-19	1.84813e-18	2.76999e-18	0.000174542	0	8.3604e-19	0.0236418	1.74076e-18	0.0255592	1.07343e-18	0.00187358	0.0268511	0.0373025	0.00426007	4.6555e-20	0.00380372	0.00612176	0.00386532	0.00422605	0.00611277	0.0012372	0	0.0507999	0.0334277	0	1.88653e-18	0	0.00183104	0	0	0.000910465	0	0
GSM795140	0	0	1.04643e-18	0.00520909	4.42821e-19	0	0	0	0.0161029	0	0.00971191	0.0110872	0.0130206	7.66207e-20	0.0167204	0	0.00121191	0.000566027	0.00204217	0.000748236	2.21599e-18	0	0.0111457	0	0.0760128	0	5.51638e-20	0.0901591	0.0715046	0.00139007	1.59386e-19	0.00134389	0.0005642	3.40667e-05	0	0.00406377	2.22089e-19	0	0.022436	0.00523506	1.52346e-19	0	0	0	0.00704236	0.000964408	0.00330143	0	0
GSM795141	0.0611942	1.29236e-21	0.079439	0.0145436	8.10227e-18	3.60341e-18	3.2592e-18	0	2.9567e-18	2.82374e-19	0.0155442	0.0145279	0.060387	6.56269e-18	0.0804372	0.020815	0.00885384	0.000278945	7.06796e-19	0.00796771	2.97752e-22	0.0071257	0.0106163	4.51659e-20	0.0730325	0	1.61742e-19	0.0785399	0.074585	7.42932e-06	0	5.75848e-19	7.80701e-19	0.000708691	2.66282e-19	0.00037276	0.00065126	0.00383395	0.0243721	0.00889475	0	0.0215853	0.0528139	6.5906e-19	0.00382563	0.00656139	0.00459453	0	0
GSM795142	0.031825	0.00234487	0.0562973	0.0156712	0.0665233	6.91393e-19	0.00282986	0	0.00978635	1.09997e-19	0.0100973	0.0247588	0.0645422	2.06248e-20	0.0275856	0.0105263	0.000186599	0.00157162	0	0.0013552	0	0	0.0154525	0	0.0643844	1.50503e-18	0	0.0732822	0.0506826	2.43094e-19	2.024e-05	1.04903e-19	0	0.0132597	0.00107692	0	0.00358585	0.00595516	0.016055	0.032075	0	0.0126855	0.0938138	0	0.00979011	0.00606183	0.00275591	0	1.03037e-17
GSM795143	0.0371575	0	0.0133982	0.000160769	3.68834e-19	0.00516045	1.98639e-18	0.00397686	3.67446e-18	0.058718	1.92303e-20	0.00228603	0.0233473	0.011617	0.0124592	2.18734e-19	0	9.04739e-19	1.36756e-18	0.00834405	0.00234328	0	0.0248523	0	0	2.67874e-18	0	0.0500609	0.142288	0.0033589	0	0.00511104	0.00143925	0.00741446	3.82117e-19	0.00531551	2.37183e-18	0	0.0760677	0.0258011	0.000757986	0	0	0.00197886	0.00565893	1.63197e-19	0.000182635	2.71596e-22	0.0015674
GSM795144	0	5.85114e-21	0	0.0100939	0.0139075	3.49466e-19	0	0	0	0	0.0127063	0	0.0150399	9.73887e-19	0.0756017	3.17095e-18	1.16906e-19	0.00219404	0.00166678	0.00383158	0.00184217	0.00131901	0.00318054	0	0.0563297	6.13011e-19	1.98008e-18	0.124731	0.120947	0.000651718	0.000744044	0.00281891	0.000958125	0.00839279	0.0024239	0.00211671	0	0	0.03713	0.00690181	0.012945	0	2.57233e-18	0.000894672	0.0159399	0.00499793	0.00259247	0	2.05449e-19
GSM795145	2.92207e-18	1.5921e-19	0	7.96504e-19	0.0412777	9.20603e-19	0	3.93935e-18	0.0109164	0	0.00534772	3.18976e-19	0.000127013	2.49824e-18	0.0195546	0.0279784	0.0200385	2.2379e-18	1.98373e-05	3.66376e-21	0.000683479	5.35349e-19	0.00829768	0	0.0404496	0	1.35894e-19	0.110653	0.0584014	4.5192e-20	0.00141031	4.37805e-19	1.92491e-18	0.00936221	0.00579126	0.00835601	0.00136288	2.56611e-18	0.0363099	0.0284345	5.9035e-18	1.4075e-18	0.016041	0.00378029	0.0152512	0	0.00715642	1.26892e-19	0
GSM795146	0.0238626	0	0.0986985	0.0182638	0.0028217	4.4361e-19	5.9574e-20	0	8.59495e-19	0	0.00475019	0	0.0076967	1.67649e-18	0.0508453	0.0111077	0.024416	0	0	0.00197326	0.00423988	0.000544606	0.0203078	0	0.0523645	4.62483e-19	0.000528008	0.0536746	0.0175987	0.000351616	0.000570726	0.00728808	0.00304239	0.00603991	0	0.00186594	0.00223193	0.00207998	0.051888	0.0330837	1.03684e-21	5.46401e-19	0.0309047	0	0.0057887	0	0.00107529	0	0
GSM795147	0.0693752	0	0.0639401	0.0012546	0.0340589	1.41816e-21	0.00157447	6.86613e-19	0	0.0176971	0.0126351	0.00637096	0.0295121	0.00284219	0.0273421	0.0253566	0.00121575	0.0184792	0	0.00218939	0.00315411	0	0.0066429	0	0.0426785	0	0.00113173	0.0323927	0.050182	7.80592e-21	0	0.0360833	0.0252492	0.0203632	0.00108625	0.00310344	9.9513e-19	5.50074e-20	0.0517635	0.0186592	0.00650084	0	0	0.000252521	1.77824e-19	0	1.34054e-05	0	0
GSM795148	0.0140024	0.000312104	0.011578	0.00704856	0.0401485	3.42539e-20	0	5.10304e-21	0.0126787	1.66464e-18	0.00761147	0.00490559	0.0071136	0	0.0217383	0.0146625	0.00284268	0	0.0105318	1.51432e-05	1.22436e-20	4.43791e-19	0.00217209	5.05268e-19	0.0222277	2.57946e-18	9.94996e-20	0.0472746	0.023155	1.39928e-18	0.00115463	0	0.000328447	0.00335949	0.00940779	0.00496788	0.000636016	0.0143761	0.0168603	0.0182531	0	1.97102e-18	5.33657e-18	5.94313e-20	0.00975009	6.40917e-20	0.00212245	2.32186e-19	1.66021e-18
GSM795149	0.140117	0.00787061	0.159256	0.0110827	0.0282471	7.52117e-19	0.0589919	3.29073e-19	0	0	0.033405	0.157864	0.159476	0.0662883	0.075467	0.0965185	1.79746e-19	1.22407e-21	0	0.00987	0.0392628	0.000562439	7.42714e-18	1.24891e-19	0.190836	1.27237e-18	0.00401214	0.278055	0.187412	0	0.0275466	0.00505603	0.0038256	0.0167692	1.23827e-20	0.00630654	0.00433746	0.00844095	1.13877e-18	0.0557628	0.0173229	0	0.00320843	0.0210327	0.00293447	0.00163606	0.00524354	5.71172e-19	0
GSM795150	0.0239869	0	0	1.30784e-18	0.0646195	0	0	7.53769e-18	0.00385719	0.0598046	0.020856	0.0355183	0.0390373	0.0263637	0.0016577	2.65379e-19	0.0153984	0.0011609	1.3067e-18	0.00158964	0	5.33727e-21	0.00655312	2.4066e-19	8.87939e-18	0	0	0.0600232	0.0940484	0	0	0.0175636	0.00917152	0.0169152	0.0032475	0	0	2.52294e-18	0.0674974	5.06375e-18	7.70464e-19	0	8.48016e-18	0.00111848	0.0171737	9.41648e-19	0.00147586	5.3469e-19	7.77849e-18
GSM795151	0.00386584	0.00465087	0.127661	0.000893251	0.0720112	0	0	3.31981e-18	0	0.00787134	0.00346566	7.51825e-20	1.79882e-18	1.93528e-18	0.0164777	0.046107	7.28631e-19	4.28987e-18	0	0	0.00429367	8.43414e-20	0.00256504	0	0.0459991	0	0.00182043	0.0796828	0.0755666	0	0	0.0135349	0.0116041	0.0099616	0.00187504	0.00433217	0.00059581	6.14913e-19	0.0588229	0.0213487	0.000934829	0	0.0115993	0.000520639	0.00335854	1.5469e-18	0.000155133	0	0
GSM795152	0.154959	0	0.0249329	0.0350299	0.0790467	0	0.00744095	0	0	0.0342002	0.00844165	0.0184881	0.0392758	0.00157725	0.034423	0.0229483	0.0256771	0.00990141	0	0.0121555	0.00205568	3.25701e-18	0.0143363	0	0.0282695	5.76467e-19	0.00101185	0.0414683	0.105396	6.11285e-19	0.00134418	0.0463437	0.0393951	0.0346369	0.00335277	0.000795704	0.000170425	0.00395133	0.0460612	0.0192521	0.0318292	4.56924e-20	0.0357871	0.0032568	0.00379892	0	1.51636e-05	1.32523e-19	0
GSM795153	0.116378	0.000250693	0.0279473	0.00631917	0.113573	1.17406e-19	0	1.04862e-18	0	0.0660131	0.00585927	0.0572408	0.133825	0.0484467	0.118409	0.0135742	0.016278	0.0034059	3.54965e-20	0.0212238	0.010462	0	0.00335865	1.12765e-18	0.0427802	1.68158e-18	0.00115687	0.0657807	0.131995	0	0.00305615	0.0646982	0.0430094	0.0253183	0.003341	0.00114638	0.00211033	0.00512653	0.0319426	0.0175706	0.0424732	0	6.54227e-19	0.00694148	0.00236879	1.31662e-19	0.000176341	1.11139e-18	0
GSM795154	0	5.00917e-20	1.66149e-19	5.27864e-19	0.0500965	0	1.81103e-18	0	1.19538e-17	4.62588e-20	0.0132149	4.88811e-19	3.22037e-20	5.96726e-19	0.0048329	0.00337511	0	0.00159002	1.08865e-19	1.17625e-19	0.00752922	1.19755e-18	0.0248925	7.69282e-19	0.0369331	0	0.00223834	0.0822734	0.0569893	0.00128492	0.001575	0	0	0.000646082	0	0.00420584	0	0	0.0595861	0.0320566	0	3.57854e-19	0	0	0.00267383	0	0.00136972	6.51718e-19	0
GSM795155	0.013903	6.39671e-21	4.7616e-19	2.31269e-19	0.064206	1.45105e-19	0	0	0	0.00516682	0.00391281	0	0	0	0.0128704	0.000818729	4.29571e-20	0	6.45472e-18	0.00249021	0	0	0.00766062	1.86405e-19	1.80724e-18	1.64473e-18	0.00173734	0.0419639	0.081904	1.57212e-19	1.98661e-19	0.00933306	0.014724	0.00564427	0.000718528	0.00322346	2.60626e-18	3.52912e-19	0.0560361	0.0334497	3.70267e-18	0	0	9.31172e-22	0.000488864	8.03199e-19	0	2.5502e-20	0
GSM795156	0.0421461	0.00404442	0.104731	5.16094e-20	0.00485393	0	0.000141554	0	0	0.0201182	0.014288	0.00824251	0.00562935	0.00210512	0.00667527	0.0361841	0	0.0166462	0	0.00439073	0.0137432	2.52132e-19	0.0108701	2.01992e-19	0.0682882	0	0	0.0722294	0.0980679	0	0.00220763	0.0402111	0.0301871	0.0241498	0.00166607	0.00743897	0.00199646	0.00215893	0.032582	0.0408922	0.0225941	5.93386e-18	0.0701503	0.00827899	0.00454749	0	0.000451102	0	0
GSM795157	2.36125e-19	0	1.77342e-18	1.85748e-18	8.21261e-19	0	0	2.24016e-18	0.000608307	0	0.0150994	0.0010233	4.39378e-18	0	3.01701e-20	0.0367979	0.00694751	0.00386505	1.74832e-19	0	0.000828843	0	0.00118222	0	0	9.97288e-19	0.000166905	0.0739268	0.0279398	0	0.00610434	0	9.51016e-20	1.40884e-19	0.00601096	0.00420894	5.2972e-19	0.00282772	0.0660298	0.00165309	1.76077e-18	0	2.20038e-18	0.000818327	0.0149234	5.46722e-19	0.00536007	0	0
GSM795158	0.0953296	9.98106e-19	0	0	0.0238877	0	3.10986e-19	0	2.07192e-18	0.0342227	0.0150644	0.0101822	0.04107	0.0267281	0.0123189	0	0.00777608	0.0306725	5.36472e-18	0.00786918	0.00310983	9.19117e-19	0.0400544	3.1292e-19	0	9.00625e-18	1.56198e-19	0.0587944	0.0869117	0.00227636	2.64463e-05	0.0150527	0.0128803	0.00832791	0	0.00450595	0	5.31033e-18	0.0437945	0.0061253	0.0110031	0	7.14943e-18	0.0041216	1.40933e-05	0	0	0	0.0114107
GSM795159	0.035229	8.87701e-05	0.0666612	0.00150749	0.0248531	4.2887e-19	1.42222e-19	0	0	0.0214116	0.00939843	0.0226421	0.0362686	0.0148048	0.00588043	0.0208758	0.010838	0.00348094	1.72441e-18	0.000253562	0.00869137	0	0.0143717	0	0	2.13073e-18	0.000392905	0.0713739	0.0323175	0.000245764	0.00161274	0.0152311	0.0127404	0.0119797	0	0.00512491	0.00164048	0	0.0764344	0.0183564	6.83649e-20	0	0.0730206	0.00952383	0.00505179	0	0.000537825	2.24087e-19	1.14365e-18
GSM795160	0.0843628	0.0115215	0.0842533	0.00463611	0.0350483	4.35064e-19	0.0105006	1.7949e-18	9.0623e-18	0.0407396	0.0140686	0.0328328	0.0441262	0.0342097	0.00387123	0.0341653	0.00249403	0.0156878	0	1.77727e-20	0.0252978	0	0.0130744	9.55935e-20	0.0415151	1.41414e-18	0	0.0895656	0.0960036	0	0.00488861	0.0850648	0.0609231	0.052196	0.00579232	0.00460254	0.00188412	0	0.0437315	0.00397285	0.0241034	0	0.0833198	0.0159537	0.00344607	0	0.000627309	0	6.35045e-19
GSM795161	6.34831e-19	7.80427e-19	0	0	0.0950518	8.04027e-19	6.40157e-20	7.45633e-18	0.00144958	4.65381e-19	1.16479e-18	0	6.36295e-18	0	4.84269e-20	0	0.00233786	2.367e-18	6.37338e-19	0	0.00440598	0	0.0138437	7.26478e-19	3.3095e-18	1.41029e-18	0.00052304	0.0306678	0.0334365	8.45162e-19	0	0	0	2.19588e-20	0.0120597	0.00886815	0	0	0.0368434	0.0311506	7.93095e-18	0	0	0.00223883	0.00751852	0.00104227	4.96417e-05	1.9286e-19	0
GSM795162	0	0	0.0218865	5.67891e-19	0	1.67878e-18	0	5.18646e-18	0	6.6683e-19	0.0125052	3.56642e-18	4.27561e-18	2.52584e-18	0.0064612	0.01539	0	2.87035e-19	0.00225798	0	3.95789e-05	1.03881e-18	0.0109722	2.95358e-20	0.0189001	0	0	0.122818	0.023547	0.000275381	0.00100086	1.69856e-18	1.99173e-20	0.000579721	0	0.00503077	1.75564e-18	0	0.0525078	0.0336459	1.93155e-18	0	0	0.00369216	0.00587286	8.63708e-19	0.00182449	1.96516e-19	0
GSM795163	0.112616	0	0.0161127	0.0407583	0.0448586	0	0	0	0	0.0512437	0.00305877	0.0352718	0.0922364	0.0390466	0.0270069	0	0.0119411	2.00734e-19	0	0.0104564	0	2.54264e-20	0.0181048	0	0.00642391	8.34602e-19	0.000465316	4.727e-18	0.165678	0.00374338	1.27357e-20	0.0292962	0.0230597	0.0149876	0.00180185	2.68952e-21	3.17253e-21	0.00809329	0.026711	0.028336	0.00402548	0.032606	0.000173933	0.000272637	0	0	6.95631e-21	0	6.81653e-19
GSM795164	0.142252	0.00428378	0.206639	0	0.0595275	0	0.0307734	0	3.65232e-19	0.0111156	0.0104739	0.0253492	0.0450095	0.0309799	0.00372904	0.0752036	0.00342321	0.000341523	0	0	0.0397683	7.62721e-19	0.00051441	0	0.083319	1.11044e-19	0	0.0820942	0	5.854e-19	0.0112717	0.0405937	0.0326197	0.0193638	0.00214072	0.00248846	7.1841e-22	0	0.0279263	0.00652908	5.02994e-18	0	0.0722937	0.0245456	0	0	0	0	2.14767e-20
[truncated: 20 more columns]

## Sheet: immune_infiltration_GSE63885
	aDC	Adipocytes	Astrocytes	B-cells	Basophils	CD4+ memory T-cells	CD4+ naive T-cells	CD4+ T-cells	CD4+ Tcm	CD4+ Tem	CD8+ naive T-cells	CD8+ T-cells	CD8+ Tcm	CD8+ Tem	cDC	Chondrocytes	Class-switched memory B-cells	CLP	CMP	DC	Endothelial cells	Eosinophils	Epithelial cells	Erythrocytes	Fibroblasts	GMP	Hepatocytes	HSC	iDC	Keratinocytes	ly Endothelial cells	Macrophages	Macrophages M1	Macrophages M2	Mast cells	Megakaryocytes	Melanocytes	Memory B-cells	MEP	Mesangial cells	Monocytes	MPP	MSC	mv Endothelial cells	Myocytes	naive B-cells	Neurons	Neutrophils	NK cells
GSM1559301	0.101493	1.03751e-20	0.0414902	0.0105871	0.0303024	5.60131e-20	6.46517e-20	0	2.94885e-18	0	0.00116466	2.26355e-19	0.00205569	0	0.00272302	0.00500569	1.55894e-18	0	0	1.42552e-19	6.27652e-19	3.87027e-19	0.0064669	0	0.0351036	0	0	0.0180694	0	0.000273026	7.56698e-19	0.0362188	0.0565688	0.00155396	0	9.47067e-21	0.0025284	0.00272098	7.39595e-19	0.0135932	0	1.13367e-18	0.209935	0	0	6.64393e-19	0.000291807	0	0
GSM1559303	0.000699318	0	0	0.0191283	0.0487735	4.26861e-19	0.00230415	0	0	4.17406e-18	0	5.70788e-19	0.000451367	0	0.0032542	0	0.00267116	0.00384281	0	0	9.16661e-19	0	0.00961225	0	1.14297e-17	2.6217e-18	2.57113e-19	0.0130802	0.00223307	1.00059e-19	0	3.25899e-19	8.75039e-21	4.63968e-20	0.000692131	0	6.00156e-18	2.06447e-18	0.0172107	0.0115094	6.27924e-18	4.09402e-18	0	1.10724e-19	3.25875e-19	1.02242e-19	0.000235084	0	1.07999e-17
GSM1559304	0.0473215	0	0	0	0.0224211	1.9745e-19	0.000822082	0	1.44694e-18	0.0256415	0.00405287	0.00248288	0.000924234	1.52959e-19	0.0327098	0.0752001	0	0	0.00526681	0.00110969	0.015345	0.000138827	0.00684215	9.20584e-21	0.0702191	1.29596e-18	0.00103777	0.0919875	0	0.000921929	0.00317568	0.00378573	0.00550592	0.00581345	0.00280911	0.00405907	0.000930741	9.16937e-19	0.000133588	0.0144703	1.05024e-19	2.90966e-19	0.0656318	0.0113411	0	1.0614e-18	0.000626487	0	0
GSM1559305	0.0303404	0.00108336	0	0.002285	0.0915261	0	0	3.8453e-18	1.70139e-18	0	0	1.00871e-18	0	0	0.00663974	0	0.00268475	4.87312e-19	0	1.09347e-20	0.0125925	0	0.0190646	6.8196e-19	1.45973e-18	0	7.55061e-05	0.0114875	0.0058992	0	0.000426116	4.29268e-22	0.00993042	2.46508e-19	0.00221098	3.86932e-20	0.00546764	0	0.00367567	0.00107792	0	0	0.051287	0.0102309	0.00128476	3.3281e-20	0	0.00100221	1.05427e-18
GSM1559307	0.0179367	3.65585e-19	0.00781542	5.11978e-19	0.0100975	0	0	3.4562e-19	0	1.66636e-19	0.00281181	9.70381e-19	0.00201546	0	0.00855005	0	0	0.0041381	0	1.50101e-18	0.0146076	1.18571e-19	0.00952083	0	1.50349e-18	0	1.35328e-18	0.051802	0.000875857	0.000430759	0.00108554	5.05123e-05	0.00196032	0.000414443	0	0.0010767	3.89589e-19	0	0.021658	0.00754478	1.10834e-19	3.78608e-18	0.230381	0.0125151	2.26897e-20	1.68418e-18	4.1558e-05	0	2.35351e-18
GSM1559308	0.000674014	0.00264419	0	1.7714e-18	0.056117	0	1.71448e-18	0	3.24341e-18	1.19504e-17	0.00235634	0	0.00693911	0	0.0103143	0.0274854	0	0.00299376	0.000952584	0	1.1567e-18	6.49549e-19	0.0101361	0	0.0635391	0	0	0.0828239	0.00366096	0.000412967	1.20086e-20	1.06874e-19	0	0.0013773	0.00682417	0	0.00118318	4.32516e-18	0	0.0172197	0	3.05115e-18	0.049228	0	6.70624e-19	8.81803e-19	0.000457985	4.25288e-19	0
GSM1559311	0.0438062	3.42065e-19	1.19601e-18	6.14749e-19	0.075246	0	1.24887e-18	0	0	0	0.0118936	0	0	1.33519e-18	0.0154618	0.0011383	9.08755e-18	0.0081231	0.00357371	2.02392e-19	0.0108184	6.65624e-19	0.010206	0	0	0	5.02275e-19	0.137316	9.68858e-19	0.000523616	2.80039e-05	0.00882169	0.0182807	0.00830183	0.00389884	0.000625597	0.00283057	0	0.0117389	0	0	7.93743e-18	0.197265	0.0165603	0.00460384	0	0.000738749	0	0
GSM1559312	0.129981	0.00308178	0.110873	0.0285507	0.0484837	0	0.00652633	0	6.54644e-19	0.0115634	0.0264928	0.0453146	0.0245117	0.00183577	0.014676	0.0456914	0	0	2.32472e-19	0.000928101	1.00849e-19	1.9315e-19	4.15551e-19	1.43687e-19	0.0187313	9.47449e-19	2.64516e-19	0.0601206	0	3.21581e-19	5.39891e-21	0.00132046	0.0104666	0.00116078	0	6.05366e-05	0	0	0.00468159	0.0163293	7.9736e-19	0	0.0897661	3.3688e-20	0	0	0.00441706	9.56779e-20	6.77491e-19
GSM1559313	0.044362	9.16584e-21	0	0.00956756	0.040844	1.14415e-19	1.81422e-18	5.04036e-18	8.06475e-18	0.00154686	0.000643281	3.4073e-18	0.00352133	6.89991e-18	0.0274403	0	3.51945e-18	0.0056293	0.0135417	0.00216672	0.00215522	1.2103e-20	0.0182352	0	0.0011817	2.10612e-19	0	0.123078	0	0.00122223	2.3675e-19	0.00812883	0.0139677	0.00330352	0	0.00220541	0.00516225	3.89873e-18	0.0184493	1.58943e-18	1.30091e-17	5.49911e-18	0.114834	0.00588805	2.16315e-19	7.84154e-19	3.3754e-05	0	2.26424e-18
GSM1559317	0.0565563	0.000211405	0	0.0142373	0.050997	2.32821e-20	0.00107719	1.87066e-19	2.9089e-20	0.00536726	0.00344254	0.00141041	0.00381284	0	0.00332639	3.92472e-19	4.46982e-18	3.51107e-21	1.17184e-23	0.000600245	0.0197047	4.40895e-19	0.00632057	0	0.011767	2.95135e-18	0	0.0673431	1.12859e-19	9.03766e-20	0.00166988	1.3428e-18	0.00457283	0.00125769	0.00115937	0	0.0015049	1.81346e-19	0.00517447	0.0101507	0	0	0.03016	0.00565384	0.00461248	0	0.000634111	0	0
GSM1559322	0.13068	0.00559876	0.086348	1.20784e-18	0.0208597	1.05423e-19	0.0160443	1.78962e-18	2.88711e-19	0.0161877	0.00178433	0.0046407	0.0069793	0.00110926	0.0446774	0.0735878	2.37667e-18	0.000435693	0.00491678	0.0065896	0.00168494	0	0.0160657	2.07209e-20	0.0975757	3.10494e-19	0	0.0919604	0.0654176	0.00240393	0	0.0138669	0.0148662	0.00689359	0	0.000933635	0.000543302	6.65495e-18	0.00278461	0.0109618	0.00819347	0	0.124937	0	8.05733e-18	3.49917e-19	0.000349299	0	0
GSM1559323	0.0343292	2.53757e-19	0	6.26738e-19	0.0293271	3.37681e-20	0.0162666	0	6.33488e-19	0.0248176	0.00579053	0.00766455	0.0111882	2.85284e-19	0.012864	0.0242545	0	0.00216187	0.0041123	0	0.000210621	0	0.0284798	0	1.52624e-18	9.43804e-19	0	0.039561	0.0161876	0.00811344	0.000685426	0	5.38993e-19	0.000153168	0.00250173	2.00076e-20	0.000734855	0	4.41076e-19	0.000468095	1.99931e-18	8.72161e-18	0.064784	0.000698164	2.57124e-19	0	0.00154903	0	0
GSM1559326	0.075245	0.000757819	0.0558737	1.23926e-20	0	0	1.5934e-19	0.00481619	4.54723e-18	0.0289076	0.00215587	0.0062261	0.0224475	0.00253289	0.00454108	0.11682	0	0.000367944	0.00328069	0.000451532	0	0	1.24273e-19	1.11215e-20	0.0871557	0	1.01187e-20	0.0891725	0	0	3.667e-19	0.00445702	0.00693645	0.00301148	1.10533e-19	0	0.0019535	1.5985e-18	0.000344802	0.00446616	1.45222e-18	0	0.0524797	1.05754e-18	0	0	0.00185148	0	0
GSM1559329	0.0760174	0.00225362	0.0494016	0.000850324	0.0413525	0	0	2.9697e-19	2.64921e-18	0.0187203	0.00259852	0.000168876	0.0107484	1.71694e-18	0.0105743	0.0187336	6.84114e-19	0.0039802	0	0	2.30267e-19	4.70437e-19	0.00749364	0	0.0135005	0	0	0.0537468	0	0.00135714	0	0.0188706	0.0318873	0.00205952	0.00202908	0	0	0	0	0	0	1.32377e-18	0.113671	2.03434e-19	0	5.8336e-19	0.000144363	2.75077e-19	1.22816e-18
GSM1559330	0.0787566	1.59399e-19	0.0930169	0.00694124	0.0719177	0	0	0	2.17826e-19	0.0116803	0.00319382	7.84038e-19	0	4.45352e-18	0.025819	0.0109464	0	0	0	0.00310136	7.21904e-19	9.15935e-19	0.000722222	3.97231e-19	0	5.45417e-19	1.59106e-19	1.50219e-18	0.0113041	0	0	0.0277845	0.0387831	0	0.000686743	5.83848e-20	0	0	0.0139788	0	0.0189348	2.6446e-18	0.0311853	0	0	0	0.000304101	0	0
GSM1559332	0.0994548	0.000595909	0.115301	0.0235313	0.0217679	0	0	1.10217e-19	4.03508e-18	0.00480883	0.000914004	0.0020784	0.00415949	0	0.0277826	0.0115882	9.53854e-20	0	0.00180613	0.000947689	0.00280607	2.19254e-19	0	6.28871e-20	2.36236e-18	3.30078e-19	5.63182e-19	0.0528775	0.00319435	3.05613e-21	1.69135e-20	0.0152149	0.0162001	0.00377811	0	0.000642805	2.36031e-05	0.00562291	2.44142e-19	0.0140708	0.00081973	1.33888e-18	0.202036	0	3.07634e-18	8.16037e-21	0.000612935	0.000779209	0
GSM1559333	0	0.000403055	0	0.000666583	0.0194258	7.98077e-21	1.71689e-19	6.94993e-19	0	3.90542e-18	0.00210774	9.72856e-20	0	1.96779e-18	3.59039e-05	0.00301797	1.42688e-18	0.00328265	3.69917e-19	5.33464e-19	0.00081721	0	0.0176305	6.91152e-19	0	4.48885e-19	2.63664e-18	0.0142589	3.2599e-05	0.00293448	2.6686e-20	0	0.000622418	0	8.4176e-23	0	0.000421468	9.88463e-19	0.0231224	0.010212	1.6067e-18	6.62811e-20	0.00139917	1.48302e-19	0.00163303	0	0.000231844	0	4.21094e-18
GSM1559334	0.0098429	2.12519e-19	0	0.00320038	0.0346712	0	7.67195e-19	1.68025e-18	0.00251781	2.55428e-18	0.00792947	0.00531231	1.71599e-22	2.97381e-18	0.00889991	2.00145e-18	0	0.00592615	0.00137277	0	0.0119837	2.9014e-18	0.00828022	0	7.66132e-18	0	0	0.0635784	0.00723362	0.00126136	0.00180282	1.92811e-19	1.73028e-19	5.4989e-20	0.00768174	0.00347964	0.000686875	0	0.024968	0	1.20477e-17	6.62139e-18	0.0541661	0.00460569	0.000454223	0	0.000352708	0	2.19859e-19
GSM1559335	0.0808631	3.4206e-19	3.3231e-19	0.00185709	0.00695907	0	0.00587645	0.000966562	0	0.0219327	0.00163855	0.00168848	0.00689377	0.00294628	0.0187755	3.90184e-19	0	0.0133841	1.34274e-19	2.49552e-05	0.00754702	0	0.0333076	0	0	2.15055e-18	0	0.0264477	2.32676e-18	0.00393671	0	0.0160017	0.0203658	0.00478938	0.00233019	0.000818903	1.03325e-20	0	0.000686223	0.00688034	0.00577128	0	0.146298	0.0030707	5.70788e-21	2.51049e-20	0.000107089	6.39473e-20	2.00746e-19
GSM1559338	0.088959	2.79388e-20	0.0064755	0.0116263	0.0659416	9.08699e-20	2.40187e-18	8.1201e-19	9.20782e-19	0.00151123	0	5.27792e-19	0.000513812	0	0.0140357	0.0177209	2.04204e-19	3.04638e-19	6.87321e-20	0.00137561	0	5.52462e-18	0.0229399	0	0.0127582	0	0.00036314	0.0324197	0	0.00127309	3.01334e-19	0.0192231	0.0296493	0	0.00179484	1.43446e-19	0.00134097	0.000387148	0.000925171	0.0159794	0	5.7584e-18	0.0540931	3.09885e-20	0	1.12595e-19	0	0	0
GSM1559341	0.0736816	0.00328179	1.48473e-18	0.0068644	0.0233981	3.54256e-20	0	1.21387e-18	0	0.0111154	2.4118e-20	1.36059e-18	0.00788798	0	0.0160985	0.0537122	1.35087e-18	0.00158494	0.00383614	0.000627398	1.48643e-18	0	0.00932879	1.37044e-20	0.0538382	2.33041e-18	2.76374e-20	0.0339342	0.0169629	0.0014341	6.77626e-21	0.0264101	0.0237504	0.00794356	0.00270599	8.05655e-23	0.00109634	3.65248e-19	0.0127336	0.00232144	0.0102068	0	0.0305352	0.0018193	3.80779e-19	0	0.00102061	0	2.41879e-18
GSM1559343	0.0452683	1.04951e-19	0	0.0145503	0.0704243	0	0.0118141	0	5.06446e-22	0.0358535	0	0.0174565	0.0334806	1.44328e-18	0.0329186	0.000853386	0.00629733	0.00359863	0.00435785	0.000433485	0	0	0.0263363	0	0.0197192	0	2.12538e-19	0.0668201	3.05298e-18	0.00228033	0	0.0164453	0.0182632	0.0126565	0.011371	1.97371e-19	0.00431742	2.83672e-18	0	0	1.7191e-18	1.07441e-18	0.082449	0.00426093	0	1.4544e-18	0.000163671	1.69208e-19	7.87553e-18
GSM1559347	0.00866652	0.00315683	5.59011e-19	0	0.0711328	7.26574e-19	0	1.22679e-19	5.16327e-18	0	0.00630175	0	3.87388e-19	0	0.00012628	0.0111985	9.50729e-20	0	0.000551157	0	3.5275e-19	5.08842e-18	0.0141476	0	0.0385309	0	0	0.0542503	7.57749e-20	0.00115552	4.60349e-20	0	2.6827e-19	0.00378023	0.00216147	0	2.71703e-05	2.84281e-18	0.0132159	0.000335066	0	1.4974e-18	0.0410506	0	0	0	0.000719951	7.42015e-19	1.47246e-18
GSM1559348	0.0286947	1.04158e-22	0	0.0080757	0.0693019	5.01844e-20	4.28097e-19	0	0	0.018806	0.000185263	1.48214e-19	0.00142552	0	0.0211111	0.0038295	0.00805997	0	1.27411e-19	0.00205699	3.09748e-19	4.96812e-18	0.00964717	6.66701e-19	0	0	2.54736e-18	0.0707231	0.00240972	0	0.000309083	0.0045765	0.00397492	0.0116525	0.0034114	0.00238975	0.00254107	6.70631e-18	0.0279352	0	7.49999e-19	0	0.110115	0.00971159	0.00502227	0	0	2.70754e-19	0
GSM1559349	0.124975	0	1.48971e-18	0.024179	0.0430601	0	2.54745e-19	1.94143e-18	5.48086e-18	0.00115119	0.00386698	0.00254236	0.0082833	0	0.0130944	0.000996883	0.00125428	4.57137e-05	0.00833469	0.00268357	6.59148e-23	0	0.0177509	0	2.10323e-19	6.46632e-18	0	0.0444721	0	0	1.46401e-18	0.012986	0.0149145	0.0133728	0.00442782	0.000413352	0.000453021	0	0.00831214	0	0	1.53341e-18	0.150701	0.00766252	0	0	0	1.74737e-19	0
GSM1559351	0	3.53534e-19	1.27465e-18	0.00399705	0.0120718	0	0	2.10918e-19	0	0.00783882	0.000359786	1.62268e-18	0	4.29377e-19	0.00901193	1.54641e-19	1.61527e-19	0.00881692	0	0	0.00121406	0.000350713	0.00671651	0	7.86131e-18	7.03559e-18	0.000924789	0.0168411	0.00131047	0.000186741	0.000697205	0.00135238	0.00277489	0.000960793	0.00387499	0.000743207	0.00447419	1.01992e-19	0.0123098	0.00571074	0	8.34632e-19	1.3053e-18	0.00092551	0.00134781	0	0.000213242	0.000475381	9.01001e-18
GSM1559353	0.118045	0.00228157	0.0652769	0.0226768	0.0621362	7.37075e-21	0	0	0	0.0118151	0.0046719	0.00449899	0.024856	2.16396e-18	0.0140893	0.0556318	0	0.000358233	0.00457546	0.00122809	0.000141371	0	0	0	0.00175918	0	0	0.0459642	0.00420468	0	0	0.00768178	0.0159099	0.00467245	0.00772616	1.68086e-19	0	0	0.00650362	0.00554208	0	0	0.110104	0.00252256	6.62317e-19	7.045e-20	5.03213e-05	0	9.59772e-20
GSM1559355	0.0613175	1.26227e-20	9.05999e-18	0.00909463	0.045381	1.00717e-21	8.13596e-19	0	1.20902e-17	0.0117474	0.00104383	0	0.00565562	1.25892e-18	0.00717744	0.0172821	0	0.00748638	0.00166599	0	4.18542e-21	5.4174e-19	0.0235469	0	0.0172342	0	2.19243e-19	0.0328854	0	0.00339777	0	0.0189181	0.0254468	0.00090293	0.00592874	0	0.000478332	8.96945e-19	0.00367431	1.03184e-20	0	3.20537e-18	0.00078352	0.000108046	0	2.14981e-19	0	0	2.96558e-18
GSM1559360	0.0157769	5.84687e-23	0.027852	1.0383e-19	0.0256474	0	0	6.96339e-19	5.44901e-19	0	0.000540707	5.6843e-20	0.000157396	0	0.0100162	0.0524814	3.0015e-19	0.00561947	2.29597e-19	0	0.00122877	0	0.0264353	0	0.00626164	0	2.05618e-18	0.0307978	0.00466932	0.0138316	0	0.00210609	0.00345652	0.00163224	0.00273576	0	7.62596e-19	1.31329e-18	0.00439928	0.003662	1.51331e-19	0	2.17981e-18	0.000743748	1.03017e-18	0	0.000611705	0	0
GSM1559361	0.049913	1.48627e-18	3.83752e-18	0.00743684	0.0691728	4.84176e-19	0	0	2.15246e-18	0.0142373	0.00845875	1.71177e-19	3.05528e-19	4.00198e-19	0.0371781	0	1.74632e-05	0.00960912	0.00271867	0.00176186	0	0	0.00731199	8.0216e-20	1.48862e-18	3.03909e-19	8.43332e-21	0.0444079	0.0708194	0.00151538	0	0.012836	0.0193086	3.60592e-19	0.00306375	0	0.00129594	0.00441622	8.79468e-20	0.00436433	0	2.88056e-18	0.193819	0.00225556	2.07852e-18	0.000234635	0.000779736	0	0
GSM1559362	0.0232879	1.02294e-19	0.00253565	0.00218057	0	3.50355e-20	0.0119029	0.00380342	2.20859e-18	0.0216001	0.00183036	0.00753102	0.0458889	0	0.0126011	0.0285257	1.38582e-19	1.06606e-22	0.00165925	0.000122944	0.00897989	0	0.00454999	0	0.021479	0.000199522	0	0.0568471	0	0.000119006	0.000229324	0.00100702	0.00178548	0	0.000573883	0.000511283	0.00405005	9.90965e-19	0	0.00450841	0	1.53926e-18	0.0219015	3.31282e-20	4.24993e-19	7.20734e-20	0.00129252	1.7978e-19	1.0285e-21
GSM1559365	0.066994	2.65814e-21	0.0121382	0	0.103515	1.5411e-19	0	0	0	0.0370869	2.70778e-19	0	1.11168e-18	5.24025e-18	0.0327926	0.0120225	0.00888487	2.49269e-19	0.00179535	0.00518077	0.00533772	0	0.0280685	1.07697e-18	0.0146933	0	0.00256507	0.0219931	0.0545392	0.00407894	0	0.0143322	0.0172568	2.66693e-20	7.58211e-21	0.00215125	0.00213223	0	1.83684e-18	0.00292012	0.0698073	8.41304e-18	0.13054	0.00732808	0	1.51565e-18	5.84903e-05	0.00490412	1.69077e-19
GSM1559366	2.52898e-21	6.44296e-20	8.74046e-18	1.38469e-19	0.00994923	0	3.34678e-19	5.4683e-18	4.94605e-18	6.68447e-18	2.56651e-19	2.14634e-19	7.47317e-18	2.31937e-17	1.61087e-20	1.11321e-17	2.24935e-20	0.00158	0	0	0	0	0.023464	0	2.54744e-18	0	0	0.029374	0	0.000172618	0	5.8079e-19	1.36035e-18	0.00397066	0.000289356	0.000253777	0	0	0.0121874	0.0180443	3.28893e-18	2.0756e-18	0.0243922	0	0	0	0.00103041	0.000455073	4.8889e-18
GSM1559368	6.19491e-18	0	2.22526e-17	1.0086e-20	0.00886824	1.47717e-19	0	0	5.18616e-18	2.90682e-17	0.0204869	8.64703e-19	0	0	0.0171394	7.29765e-18	0	0	0.00994881	0	0.0247852	1.40553e-19	9.82938e-05	8.00991e-20	1.2321e-17	1.48829e-18	0	0.0333983	0.039592	0	0.000579894	1.05796e-18	0	1.3114e-20	0.00497188	0.00515844	0.000337544	2.92894e-19	0.0199093	0.00554371	3.09842e-18	0	0.118491	0.0161373	0.0114584	0	0.00212101	0.00142331	2.93294e-18
GSM1559371	0.0289279	0	0.0102176	0.00486365	0.000283311	1.01518e-21	3.21021e-20	0.00122467	0	0.0170206	0.00511905	0.0143841	0.0268973	3.53006e-20	0.00840341	0.0671072	0	0.00493407	0.00131069	0.000775179	0.00873578	0	0.000629469	0	0.0537162	2.35428e-18	0	0.0269857	0.0276011	0	0.000317037	0.00622436	0.0119006	0	0.00211511	0.00032117	0.000631717	0	0.00879544	4.67914e-19	0.0020025	2.21974e-18	0	0.0020252	0.00126529	0	0.000250255	2.2509e-05	7.52112e-19
GSM1559373	0.11748	1.52148e-19	0.112332	0.0103608	0.0340789	0	0.00236758	0	0	0.0220012	0.000739818	0	2.0555e-19	0	0.0109191	0.0157401	0	0	3.47911e-19	2.99418e-20	0.0345017	5.71776e-19	0.00135712	6.40841e-20	0	0	5.0716e-19	0.0555419	1.94861e-19	4.58899e-19	0.00308603	0.02625	0.0450394	0.0124218	0	0.000321812	0.00205992	4.50355e-19	0	0	1.98699e-20	1.82634e-18	0.23381	0.0157645	0	8.28419e-19	4.56023e-05	4.58118e-20	0
[truncated: 20 more columns]
