# Supplementary material for: High expression of RIPK2 is associated with Taxol resistance in serous ovarian cancer
Source: J Ovarian Res. 2022 Apr 27;15:48. doi: 10.1186/s13048-022-00986-2 (PMC9044796; doi:10.1186/s13048-022-00986-2)
Supplement: Supplementary file 9 — Additional file 9: Supplementary Table 9. RIPK2_expression_immune_infiltration. [file 13048_2022_986_MOESM9_ESM.csv]

		TCGA_OV		GSE30161		GSE32063		GSE63885
cell type	abbreviation	correlation	p	correlation	p	correlation	p	correlation	p
Activated dendritic cells	aDC	0.240574109	1.00E-04	0.10140043	0.4976	0.289699008	0.0698	0.11751078	0.4949
Adipocytes	Adipocytes	-0.072940414	0.2467	-0.206323558	0.1641	-0.088531527	0.587	-0.0296392	0.8638
Astrocytes	Astrocytes	-0.005286441	0.9332	0.007137353	0.962	0.057911601	0.7226	-0.02585123	0.881
B-cells	B-cells	0.148513416	0.0179	-0.216429821	0.144	0.076982365	0.6368	0.157569521	0.3587
Basophils	Basophils	0.05745242	0.3618	-0.620952821	0	0.166635394	0.3041	0.160756806	0.349
CD4+ memory T-cells	CD4+ memory T-cells	0.143938142	0.0218	0.562795189	0	-0.023908007	0.8836	0.210320515	0.2182
CD4+ naive T-cells	CD4+ naive T-cells	0.075190384	0.2324	-0.139547562	0.3495	0.005271441	0.9742	-0.139470804	0.4172
CD4+ T-cells	CD4+ T-cells	-0.100088836	0.1115	-0.435939651	0.0022	-0.203297892	0.2083	0.152515085	0.3745
CD4+ central memory T-cells	CD4+ Tcm	-0.095912404	0.1274	-0.32294791	0.0268	-0.145718639	0.3696	0.053372434	0.7572
CD4+ effector memory T-cells	CD4+ Tem	0.056019413	0.374	-0.196093857	0.1865	0.173009453	0.2857	-0.129123819	0.4529
CD8+ naive T-cells	CD8+ naive T-cells	-0.145602851	0.0203	0.738266242	0	-0.118298232	0.4672	-0.22034776	0.1966
CD8+ T-cells	CD8+ T-cells	0.085920689	0.1722	0.017109065	0.9091	0.11772554	0.4694	-0.13208676	0.4425
CD8+ central memory T-cells	CD8+ Tcm	0.155385477	0.0132	-0.265682104	0.0711	0.279399374	0.0808	-0.136988417	0.4256
CD8+ effector memory T-cells	CD8+ Tem	0.037631345	0.5505	-0.189302055	0.2025	0.209626	0.1942	0.016167677	0.9254
Xonventional dendritic cells	cDC	0.073606529	0.2424	-0.232636105	0.1156	0.305065666	0.056	0.002831403	0.9875
Chondrocytes	Chondrocytes	-0.11769233	0.0611	-0.358552971	0.0133	-0.074696003	0.6469	-0.034536111	0.8415
Class-switched memory B-cells	Class-switched memory B-cells	0.135371014	0.031	-0.543122045	1.00E-04	0.370580668	0.0186	0.262499282	0.1219
Common lymphoid progenitors	CLP	0.135478187	0.0309	0.647388842	0	0.102332936	0.5298	0.11206565	0.5152
Common myeloid progenitors	CMP	-0.096089222	0.1267	-0.09954365	0.5056	-0.217850347	0.1769	0.084628579	0.6236
Dendritic cells	DC	0.125873594	0.0451	-0.244607906	0.0975	0.471032484	0.0022	0.212554555	0.2133
Endothelial cells	Endothelial cells	-0.022611631	0.7199	-0.352779424	0.015	0.038479072	0.8136	-0.078866045	0.6475
Eosinophils	Eosinophils	-0.001994748	0.9748	0.032101845	0.8304	0.070483999	0.6656	-0.091420043	0.5959
Epithelial cells	Epithelial cells	0.187532198	0.0027	-0.014570264	0.9226	0.256660413	0.1099	0.154964927	0.3668
Erythrocytes	Erythrocytes	0.091741652	0.1448	0.035255523	0.814	-0.10340459	0.5255	0.103261678	0.549
Fibroblasts	Fibroblasts	0.000491085	0.9938	0.13864735	0.3527	0.190087173	0.2401	-0.027217096	0.8748
Granulocyte-macrophage progenitors	GMP	-0.027141305	0.6668	0.088695441	0.5533	-0.085567765	0.5996	0.054887822	0.7505
Hepatocytes	Hepatocytes	-0.000774512	0.9902	-0.127578808	0.3928	0.084175192	0.6056	-0.056452138	0.7437
Hematopoietic stem cells	HSC	-0.213939936	6.00E-04	0.454340427	0.0013	-0.0369606	0.8205	-0.345173745	0.0398
Immature dendritic cells	iDC	-0.10974483	0.0809	-0.629980941	0	0.309113936	0.0523	0.199498378	0.2434
Keratinocytes	Keratinocytes	0.162886761	0.0093	-0.057994435	0.6986	0.049256366	0.7628	0.051372394	0.766
Lymphatic endothelial cells	ly Endothelial cells	-0.055474171	0.3786	-0.361464404	0.0125	-0.028635738	0.8608	-0.056519703	0.7434
Macrophages	Macrophages	0.233556834	2.00E-04	-0.076605068	0.6088	0.241126867	0.1339	0.263645735	0.1203
Macrophages M1	Macrophages M1	0.272700576	0	0.221309544	0.1349	0.196953279	0.2232	0.291267135	0.0848
Macrophages M2	Macrophages M2	0.121774058	0.0526	-0.207125878	0.1624	0.284803002	0.0751	-0.247165154	0.1461
Mast cells	Mast cells	0.008460412	0.8933	-0.436341986	0.0022	-0.359062356	0.0229	-0.027124951	0.8752
Megakaryocytes	Megakaryocytes	-0.096066751	0.1268	-0.240246398	0.1038	-0.250386979	0.1192	-0.046831965	0.7862
Melanocytes	Melanocytes	0.256481295	0	-0.451518585	0.0014	0.177812655	0.2723	0.361340506	0.0304
Memory B-cells	Memory B-cells	-0.084469499	0.1796	-0.144878857	0.3312	0.229364172	0.1545	0.062739849	0.7162
Megakaryocyte–erythroid progenitors	MEP	-0.164243547	0.0087	-0.413495188	0.0039	-0.032457786	0.8421	0.130927944	0.4466
Mesangial cells	Mesangial cells	0.022064053	0.7264	-0.077801956	0.6032	0.126266417	0.4361	-0.269413917	0.1121
Monocytes	Monocytes	0.148252257	0.0181	0.016951264	0.91	0.212000152	0.1891	0.035680802	0.8363
Multipotent rogenitors	MPP	0.04553137	0.47	0.215854186	0.1451	0.175564623	0.2785	0.227699719	0.1817
Mesenchymal stem cells	MSC	-0.020803513	0.7414	-0.534978697	1.00E-04	0.260967029	0.1038	-0.098333226	0.5683
Microvascular endothelial cells	mv Endothelial cells	-0.02817329	0.655	-0.525970666	1.00E-04	-0.106228117	0.5141	-0.135366424	0.4312
Myocytes	Myocytes	-0.135228531	0.0312	-0.335677356	0.0211	-0.131581432	0.4183	0.070433107	0.6831
naive B-cells	naive B-cells	0.047864848	0.4475	-0.076691682	0.6084	-0.127006931	0.4348	0.016597091	0.9235
Neurons	Neurons	-0.368929368	0	-0.627253845	0	-0.135429391	0.4047	-0.362113703	0.03
Neutrophils	Neutrophils	-0.083245629	0.186	-0.040826061	0.7853	0.059160602	0.7169	-0.138211569	0.4215
NK cells	NK cells	-0.047672101	0.4494	-0.249613372	0.0906	0.00591606	0.9711	0.009431145	0.9565
Natural killer T-cells	NKT	0.037235856	0.5547	-0.500766687	3.00E-04	-0.014977117	0.9269	-0.180577901	0.2919
Osteoblasts	Osteoblast	-0.169427315	0.0068	0.158390908	0.2876	0.026841861	0.8694	0.092508377	0.5915
Plasmacytoid dendritic cells	pDC	0.250548359	1.00E-04	-0.355342116	0.0142	0.23344701	0.1471	0.237356526	0.1634
Pericytes	Pericytes	-0.003361319	0.9575	-0.4526499	0.0014	-0.061887784	0.7044	-0.299854666	0.0756
Plasma cells	Plasma cells	-0.118715864	0.0588	-0.421533483	0.0032	-0.267404771	0.0953	-0.129763135	0.4507
Platelets	Platelets	-0.001748765	0.9779	0.147620688	0.3221	0.112179549	0.4907	-0.053328358	0.7574
Preadipocytes	Preadipocytes	0.059593574	0.3442	-0.016858921	0.9104	0.181901066	0.2613	0.168341969	0.3264
pro B-cells	pro B-cells	-0.081092255	0.1977	-0.491365777	5.00E-04	0.153862595	0.3432	0.215166862	0.2076
Sebocytes	Sebocytes	0.185674799	0.003	-0.080046624	0.5928	0.127692701	0.4323	0.296134267	0.0795
Gamma delta T-cells	Tgd cells	0.053837496	0.3929	-0.247066228	0.0941	0.215533914	0.1817	0.040683244	0.8138
Type 1 T-helper cells	Th1 cells	0.004171559	0.9473	-0.170686015	0.2513	0.048780488	0.7644	-0.057984456	0.7369
Type 2 T-helper cells	Th2 cells	0.209507499	8.00E-04	0.156011324	0.295	0.274090105	0.087	0.178120978	0.2974
Regulatory T-cells	Tregs	0.087630881	0.1638	0.055045768	0.7133	-0.053344814	0.7437	0.022835535	0.8948
